# Supplementary material for: Chemical Proteomics and Phenotypic Profiling Identifies the Aryl Hydrocarbon Receptor as a Molecular Target of the Utrophin Modulator Ezutromid
Source: PubMed Central journal article supplement (PMC7003794; doi:10.1002/anie.201912392), 2020-01-03
Supplement: ANIE-59-2420-s001.pdf [file ANIE-59-2420-s001.pdf]

## Supporting Information

### **Chemical Proteomics and Phenotypic Profiling Identifies the Aryl Hydrocarbon Receptor as a Molecular Target of the Utrophin Modulator Ezutromid**

*Isabel V. L. Wilkinson, Kelly J. Perkins, Hannah Dugdale, Lee Moir, Aini Vuorinen, Maria Chatzopoulou, Sarah E. Squire, Sebastian Monecke, Alexander Lomow, Marcus Geese, Philip D. Charles, Peter Burch, Jonathan M. Tinsley, Graham M. Wynne, Stephen G. Davies, Francis X. Wilson, Fraydoon Rastinejad, Shabaz Mohammed, Kay E. Davies, and Angela J. Russell\**

anie\_201912392\_sm\_miscellaneous\_information.pdf

|                                                                                 |    |
|---------------------------------------------------------------------------------|----|
| Supporting information                                                          |    |
| Experimental section                                                            |    |
| Materials                                                                       | 2  |
| Cell Culture                                                                    | 2  |
| Utrophin Fluc reporter gene assay                                               | 2  |
| Utrophin Western blot assay                                                     | 2  |
| DMD myoblast differentiation and fusion assay                                   | 3  |
| Chemoproteomics workflow of intact cell labelling followed by LC-MS/MS analysis | 3  |
| Chemoproteomics followed by AhR immunoblotting                                  | 4  |
| AhR:ARNT expression                                                             | 5  |
| AhR:ARNT fluorescence quenching assay                                           | 5  |
| RT-qPCR                                                                         | 5  |
| AhR localisation immunofluorescence                                             | 6  |
| Statistics                                                                      | 6  |
| General and analytical procedures                                               | 7  |
| Experimental procedures and data for the synthesis of probes 2, 3, 4 and 7      | 7  |
| Chiral purification of probe 7                                                  | 20 |
| Selected spectra                                                                | 22 |
| Supplementary figures S1-8                                                      | 29 |
| References                                                                      | 37 |

## Experimental section

### Materials

The following materials were obtained from commercial sources: biotin azide (Sigma #762024), TAMRA-biotin-azide (DC Biosciences #CCR-1048), TBTA (Cayman Chemical #18816), TCEP (Sigma #C4706), CH-223191 (Selleckchem #S7711), GNF351 (Sigma #182707), ITE (R&D systems #1803/10) and heregulin (Recombinant Human NRG1-beta 1/HRG1-beta 1 EGF Domain Protein, R&D systems #396-HB-050). Ezutromid was provided by Summit Therapeutics PLC.

Analytical procedures and chemical synthesis of **2**, **3**, **4**, and SMT022332 are described in the supplementary information.

### Cell culture

H2K-*mdx*<sup>11</sup> and H2K-*mdx* utrA-luc cells<sup>2,31</sup> were maintained in DMEM (Life Technologies) supplemented with 20% Fetal Bovine Serum (Life Technologies), 2% CEE (SLI), 2 mM L-Glutamine (Life Technologies), 1% Penicillin Streptomycin (Life Technologies) and 2 µg/500 ml Mouse Interferon-γ (Roche). Cells were maintained at 10% CO<sub>2</sub> at 33 °C.

Immortalised DMD myoblasts isolated from the Fascia lata muscle of a 10 year old male, del 52 DMD (KM571DMD10FL) were acquired through collaboration with Professor Vincent Mouly (Insitut de Myologie, Paris). These were cultured in Skeletal Muscle Cell Growth Medium and Supplement (PromoCell C-23060), 20% Fetal Bovine Serum (Life Technologies) and 1% Penicillin Streptomycin (Life Technologies). Cells were maintained at 5% CO<sub>2</sub> at 37 °C.

### Utrophin FLuc reporter gene assay

White flat bottomed 96 well plates (Corning) were seeded with 5000 H2K *mdx* utrA-luc cells. After 24 h, cells were dosed with compound in triplicate, in the following concentration series: 0.01, 0.03, 0.1, 0.3, 1.0, 3.0, 10.0 µM from 10 mM solution stocks in DMSO (final DMSO concentration was 0.3%). The cells were incubated for a further 24 h, (10% CO<sub>2</sub>, 33 °C). Relative luminescence readout after using the Luciferase Assay System (Promega, E1500) reagents was measured using a FLUOstar Optima plate reader (BMG Labtech). The means from the biological triplicates were fitted with a four parameter logistic function with least squares regression (Levenberg-Marquardt algorithm) to calculate EC<sub>50</sub> values.

### Utrophin Western blot assay

6 well plates were seeded with H2K *mdx* cells ( $1 \times 10^5$ ) per well. After 24 h (10% CO<sub>2</sub>, 33 °C), the cells were dosed with query compounds in three concentrations from 10 mM solution stocks in DMSO (0.3% final DMSO concentration) in triplicate. Heregulin at 30 nM was used as a positive control. After 24 h, the cells were harvested (TrypLE Express, Gibco), washed (PBS) and lysed (RIPA buffer and protease inhibitors, Sigma #P8340). Protein content was quantified by a bicinchoninic acid protein assay (Thermo Scientific Pierce). For the Western blot, 30 µg lysate was separated by NuPAGE™ 3-8% Tris-Acetate protein gel electrophoresis

and transferred to a PVDF membrane (GE Healthcare). Utrophin protein was detected using Mancho-3 antibody (1: 50, kind gift from G.E. Morris, Oswestry, UK) and an AlexaFluor™ 680 anti-mouse antibody (1:10,000, Invitrogen). Blots were imaged with a Licor Odyssey system and relative protein quantitation was performed using Image Studio Lite. REVERT™ total protein stain (Licor) was used as a loading control, along with  $\beta$ -actin detected with anti- $\beta$ -actin antibody (1: 20,000, Cell Signaling Technology #3700S) and an AlexaFluor™ 680 anti-mouse antibody (1:10,000, Invitrogen). Experiments were carried out at least three times.

### **DMD myoblast differentiation and fusion assay**

Human DMD cells were seeded in black 384 well  $\mu$ clear cell culture plates and cultured in a differentiation medium containing DMEM/F-12 (Life Technologies), 5% KnockOut™ Serum Replacement (Life Technologies), 1  $\mu$ M dexamethasone and 1% Penicillin Streptomycin (Life Technologies). The cells were dosed with compound ( $n = 4$ , 0.1 % final DMSO concentration) in differentiation medium on days 0 and 3. On day 5, the cells were fixed (4% paraformaldehyde in PBS, 15 min), permeabilised (0.5% Triton X-100 in PBS), blocked (5% FCS, 0.1% Tween-20 in PBS, 30 min) and stained with CellMask blue (Thermo Fisher). The cells were probed with anti-myosin heavy chain antibody (1:800, R&D #MAB4470), anti-mouse AlexaFluor™ 647 (1:500, Thermo Fisher #A21242) and DAPI. The cells were imaged using a Perkin Elmer Operetta high-content analysis system using a 10  $\times$  objective. The % fusion index was calculated from nuclei detected in MHC positive area divided by all detected nuclei in four image fields per well.

### **Chemoproteomics workflow of intact cell labelling followed by LC-MS/MS analysis**

H2K *mdx* cells were seeded in 12  $\times$  10 cm diameter dishes and grown to 80% confluency. Cells were treated with 3  $\mu$ M probe **3** (with and without 100  $\mu$ M competitor **7**), 3  $\mu$ M probe **4** and the DMSO vehicle, in triplicate for each condition, to a final DMSO concentration of 0.3% in serum-free media, for 2 h at 33 °C and 10% CO<sub>2</sub>. The cells were then washed with 1  $\times$  PBS and irradiated (3 min, 5 cm distance, 365 nm 100W lamp, VWR 36595-021) in serum-free media. The cells were washed with 1  $\times$  PBS then lysed for 10 min at 4 °C with 300  $\mu$ L of a buffer containing 1% SDS, 1% triton X-100 and protease inhibitors (Sigma #P8340) in 1  $\times$  PBS. The dishes were scraped to collect the lysate, which was sonicated (4  $\times$  2 s on, 3 s off, 20% amplitude) and the total protein concentration determined by a bicinchoninic acid protein assay (Thermo Scientific Pierce). 350  $\mu$ g of lysate at 0.8 mg/mL concentration per sample was then Clicked to biotin-azide (FAC of 0.1 mM from 10 mM in DMSO stock) with CuSO<sub>4</sub> (FAC of 1 mM, from 50 mM in H<sub>2</sub>O stock), TCEP (FAC of 1 mM, from 50 mM in H<sub>2</sub>O stock) and TBTA (FAC of 0.1 mM, from 10 mM in DMSO stock) for 1 h at rt, 1000 rpm shaking<sup>[5]</sup>. Excess Click reagents were removed by protein precipitation (MeOH/CHCl<sub>3</sub>) and washing of the protein pellet (MeOH  $\times$  4). The proteins were then solubilized with 2% SDS in PBS before dilution to 0.5 mg/mL protein, 0.5% SDS using 1  $\times$  PBS. Streptavidin beads (15  $\mu$ L per sample, Dynabeads™ MyOne™ T1, Invitrogen) were washed twice (1  $\times$  PBS) then added to the labelled lysate samples. After 16 h rocking (65 rpm) at 4 °C, the beads were washed (3  $\times$

1% SDS, 1% triton X-100 in PBS,  $3 \times 4$  M urea in 50 mM ammonium bicarbonate buffer (AB),  $3 \times 6$  M urea in 50 mM AB).

On-bead digestion of pulled down proteins was achieved using a Filter Aided Sample Preparation (FASP) protocol<sup>[6]</sup>. Briefly, Vivacon 500 filters (Sartorius, VN01H02 10 kDa/VNCT01) were washed with 0.1% trifluoroacetic acid in 50% acetonitrile. The beads were loaded on the filter in 8 M urea in 100 mM AB for 30 minutes at rt. On-bead proteins were reduced (10 mM TCEP, 30 minutes, rt), alkylated (50 mM chloroacetamide, 30 min, rt in the dark) and washed ( $2 \times 1$  M urea in 50 mM AB). The proteins were subjected to tryptic digestion (0.2  $\mu$ g enzyme, Promega, 1 M urea in 50 mM AB) overnight at 37°C. Trypsinised peptides collected from the filtrate were dried and resuspended in 50  $\mu$ L 5% formic acid and 5% DMSO.

LC-MS/MS analysis was carried out on an Ultimate 3000 ultra-HPLC system (Thermo Fisher) coupled to a QExactive mass spectrometer (Thermo Fisher). The peptides were trapped on a C18 PepMap100 pre-column (300  $\mu$ m i.d.  $\times$  5 mm, 100 Å, Thermo Fisher) using solvent A (0.1% formic acid in water) at a pressure of 500 bar, then separated on an in-house packed analytical column (75  $\mu$ m i.d. packed with ReproSil-Pur 120 C18-AQ, 1.9  $\mu$ m, 120 Å, Dr. Maisch GmbH) using a linear gradient (length: 60 minutes, 15% to 35% solvent B (0.1% formic acid in acetonitrile), flow rate: 200 nl/min). Data were acquired in a data-dependent mode (DDA). Full scan MS spectra were acquired in the Orbitrap (scan range 350-1500  $m/z$ , resolution 70000, AGC target  $3 \times 10^6$ , maximum injection time 50 ms). The 10 most intense peaks were selected for HCD fragmentation at 30% of normalised collision energy (resolution 17500, AGC target  $5 \times 10^4$ , maximum injection time 120 ms) with first fixed mass at 180  $m/z$ .

Peptide identification and quantification were performed by MaxQuant (version 1.5.0.35i)<sup>[7]</sup>. MS spectra were searched against the *Mus musculus* UniProt Reference proteome (retrieved 12/01/17) alongside a list of common contaminants. The search results were filtered to a 1% false discovery rate (FDR) for proteins, peptides and peptide-spectrum matches (PSM). Protein intensity distributions were log<sub>2</sub> transformed using Perseus (version 1.5.5.3) and missing values were imputed with an estimated background noise value. The three replicates for each condition were grouped and Student's *t*-test ( $s_0 = 0$ , FDR = 0.05) performed between the active probe samples and the two controls (inactive probe and competitor). Results of this analysis were plotted using Python plotting library Matplotlib.

### Chemoproteomics followed by AhR immunoblotting

Human DMD cells were seeded in 10 cm diameter dishes and grown to 80% confluency. Cells were treated with 3  $\mu$ M probe **3** (with and without 100  $\mu$ M competitor **7**), 3  $\mu$ M probe **4** and the DMSO vehicle, in duplicate for each condition, to a final DMSO concentration of 1% in serum-free media, for 2 h at 37 °C and 5% CO<sub>2</sub>. The cells were then irradiated and lysed as above. 500  $\mu$ g of lysate at 1 mg/mL concentration per sample was then Clicked to TAMRA-biotin-azide (FAC of 0.1 mM from 10 mM in DMSO stock) as above. Excess Click reagents were removed by protein precipitation (MeOH/CHCl<sub>3</sub>) and washing of the protein pellet (MeOH  $\times$  4). The proteins were then solubilized with 2% SDS in PBS before dilution to 1

mg/mL protein, 0.2% SDS using 1 × PBS. Streptavidin beads (30 µL per sample, Dynabeads™ MyOne™ T1, Invitrogen) were washed twice (1 × PBS) then added to the labelled lysate samples. After 16 h rocking (65 rpm) at 4 °C, the beads were washed as above. Proteins were eluted from the beads by heating at 95 °C for 5 min in 1 × Laemmli buffer, 50 mM DTT, 8 M urea in 50 mM AB. The eluted proteins were separated by NuPAGE™ 4-12% Bis-Tris protein gel electrophoresis and transferred to a PVDF membrane (Roche). AhR protein was detected with an anti-AhR antibody (1:5000 in 2% BLOT-QuickBlocker™ (#WB57) solution in PBST, Enzo BML-SA210) followed by an IRDye® 800CW anti-rabbit antibody (1: 5000, Licor). Blots were imaged with a Licor Odyssey system.

### **AhR:ARNT expression**

The mAHR (residues 25-433) and mARNT (residues 82-464) proteins were co-expressed in *E. coli*, using an expression and purification strategy similar to the purification of related ARNT heterodimers (HIF-ARNT, NPAS1-ARNT, NPAS3-ARNT) described previously<sup>[8,9]</sup>. For AHR-ARNT, the ARNT protein construct was expressed using a pMKH vector which did not provide any affinity tag while the AHR protein was expressed simultaneously in the same cells (BL21-CodonPlus DE3-RIL competent cells, from Agilent Technologies, Santa Clara, CA, #230245) using the PSJ2 vector which produced a C-terminal histidine tagged protein. Bacterial cultures were grown at 37°C, induced at 16°C overnight using 0.2 mM IPTG. Cells were then harvested, lysed using sonication, centrifuged to remove the pellet, and the supernatant applied to a Ni-NTA resin following the manufacturer's recommended procedure. After extensive washing with buffer, the protein complex was eluted using buffer containing 250 mM imidazole, and the heterodimer further purified using a 1-meter Superdex-200) gel filtration column, which eluted at the expected position of the heterodimer. SDS-PAGE gels stained with coomassie blue showed both subunits were co-purified in 1:1 stoichiometric amounts.

### **AhR:ARNT fluorescence quenching assay**

Fluorescence quenching of ezutromid upon binding recombinant AhR:ARNT was monitored using a fluorescence microplate reader (Tecan Spark, 313 nm excitation/390 nm emission). 100 nM compound was incubated with AhR:ARNT (various concentrations ranging 0 – 10 µM) for 18 h (4 °C) in black 96 well plates, with a buffer containing 20 mM Tris pH 8, 200 mM NaCl and 1% DMSO. Fluorescence emission was measured and the  $K_D$  calculated by fitting the curve with a four parameter logistic function.

### **RT-qPCR**

For assessment of mouse and human total utrophin, AhR, AhRR and Cyp1b1 transcript levels, two separate vials of H2K *mdx* and human DMD cells (KM571DMD10FL) were seeded in duplicate at a density of 350,000 per 150 mm dish. After 24 h, cells were dosed with 3 µM ezutromid (final concentration 0.3% DMSO) with non-treated controls supplemented with 0.3% DMSO. RNA was extracted using TRIzol™ Reagent (Invitrogen) according to the manufacturer's instructions. 500 ng of RNA from each sample was used to generate cDNA with the QuantiTect Reverse Transcription kit (Qiagen). All RT-qPCR reactions were

amplified using the StepOne™ Real-Time Polymerase chain reaction system (Applied Biosystems) with Fast SYBR™ Green Master Mix (Thermo Fisher). Amplification was performed in n=3 using cDNA synthesised from individual dishes (n = 2) and an RNA mix (n = 3 total) using the following primers: Utrophin exon 7-9 (mouse: forward 5'-GGACCGATGGACTCG CGTTC-3' reverse 5'- CTTGTCAGGGAGATGCACAGCAAC-3', human: forward 5'-GAAGGCC TCACAGGAACATCACTG-3' reverse 5'-TCCATCCACAATGTCAGTTCCCC3'), AhR (mouse: forward 5'-GCTACTCCACTTCAGCCACCCTCC-3' 5'-GAACTGGTACCCCGATCCTCTTG-3', human: forward primer 5'- GATAGCTACTCCACTTCAGCCACCATCC-3' reverse 5'-CTCTCGTGCACAGCTCTGCTTCAG-3'), AhRR (mouse: forward 5'-CATGTGGATGACCGGCA GGAC-3' reverse 5'-GCAAGCCCTTGCCCTCCTTCTTG-3', human: forward 5'-GGAGTGCACGTA CGCGGGCCGGAAG-3', human reverse 5'-CAGCTTGAGATGATGTCAGGCG-3'), Cyp1b1 (mouse forward 5'-GCCAGCCAGGACACCCTTTC-3', mouse reverse primer 5'-GGCAGGTTGGGCTGGTCACT-3', human forward primer 5'-GGAGAACGTACCGGCCACTAT CAC-3', human reverse 5'-CACGACCTGATCCAATTCTGCC-3') and S13 (mouse: forward 5'-CCCGAGGATCTCTACCATT-3' reverse 5'-GCCACTAGACAGAGGCTGT-3, human: forward 5'- CTGATCTTCCTGAAGATCTCTACC, reverse 5'-GGCAGAGGCTGTAGATGATTCA-3'). Values obtained according to the 2- $\Delta\Delta$ CT method<sup>[4]</sup> were subject to tailed t-tests and P-values using Prism7 (GraphPad, La Jolla, USA).

### AhR localisation immunofluorescence

Human DMD cells ( $3 \times 10^4$ ) were seeded on 18 mm coverslips. After 24 h (10% CO<sub>2</sub>, 33 °C), the cells were dosed with ezutromid (3  $\mu$ M), ITE (1  $\mu$ M) or both (from 10 mM solution stocks in DMSO, 1% final DMSO concentration) in serum-free media alongside a vehicle control. After 2 h, the cells were fixed (4% paraformaldehyde in PBS, 15 min), permeabilised (0.1% Triton X-100 in PBS) and blocked (10% FBS, 0.1% Tween-20 in PBS, 1 h). The cells were probed with anti-AhR antibody (1:200, Invitrogen, #MA1-514), anti-mouse AlexaFluor™ 488 (1:2000, #A-11059, Invitrogen) and Hoescht 33342 (10  $\mu$ M, Sigma # 14533). The coverslips were mounted onto slides with FluorSave™ reagent. The cells were imaged using an Evos fluorescence microscope with a 40  $\times$  objective. Immunofluorescence experiments were performed on different cell populations three times.

### Statistics

Differences between group means were calculated by unpaired, two-tailed t-tests where *p* values  $\leq 0.05$  were considered statistically significant.

## Chemistry Experimental

### General Procedures:

Reactions were carried out under inert conditions using an atmosphere of nitrogen, anhydrous solvents and oven dried glassware, unless aqueous reagents were used or otherwise stated. Microwave reactions were carried out using a Biotage<sup>®</sup> Initiator Classic microwave synthesiser.

Anhydrous solvents were dried by passing over an activated alumina column, under an inert atmosphere, using a solvent purification system. Water was purified by an Elix<sup>®</sup> UV-10 system. All other solvents and reagents were used as supplied (analytical or HPLC grade) without prior purification. PE refers to the fraction of petroleum ether boiling in the range 30-40 °C. rt refers to room temperature. Aqueous solutions of ammonium chloride (NH<sub>4</sub>Cl) and sodium bicarbonate (NaHCO<sub>3</sub>) were saturated. Concentration of solvents *in vacuo* was achieved by rotary evaporation using a diaphragm pump. Purification by flash column chromatography was carried out using Kieselgel 60 and a positive solvent pressure.

### Analytical procedures:

TLC was carried out using Merck Kieselgel 60 F254 plates which were visualised using UV light (254 nm). Melting points were recorded on a EZ-Melt automated melting point apparatus. Fourier transform IR spectroscopy was carried out using a Bruker Tensor 27 FT-IR spectrometer as neat samples or thin films. Wavelengths of peak absorption are given in wavenumbers (cm<sup>-1</sup>), with broad (br) signals indicated.

NMR spectra were recorded using Bruker Advance spectrometers (AVII 400 or AVII 500). <sup>1</sup>H NMR spectra were recorded at 298 K, locked to the relevant solvent standard. <sup>1</sup>H NMR and <sup>13</sup>C NMR data were recorded at 298 K, locked to the relevant solvent standard. NMR data are presented as: chemical shift  $\delta$  (in ppm,  $\delta_{\text{TMS}} = 0$ ), multiplicity (s = singlet, d = doublet, t = triplet, q = quartet, m = multiplet, br = broad, obs = obscured), coupling constants ( $J$  in Hz) and integration. Proton peak assignments were based on 1D data and COSY analysis and carbon peak assignments were based on 1D data and HSQC and HMBC analysis. Low resolution mass spectroscopy was carried out on an Agilent 6120 mass spectrometer. Accurate mass measurements were run on either a Bruker MicroTOF internally calibrated with polyalanine, or a Micromass GCT instrument fitted with a Scientific Glass Instruments BPX5 column (15 m  $\times$  0.25 mm) using amyl acetate as a lock mass. HR ESI and APCI were run on a Waters Acquity Ultraperformance LC system coupled to a Thermo Orbitrap Exactive MS. Optical rotations were recorded on a Perkin-Elmer PE241 polarimeter with a water-jacketed 1 cm cell. Specific rotations are reported in 10<sup>-1</sup> deg cm<sup>2</sup> g<sup>-1</sup> and concentrations in g/100 mL.

### Chemical Experimental Procedures and Data:

#### General Procedure A:

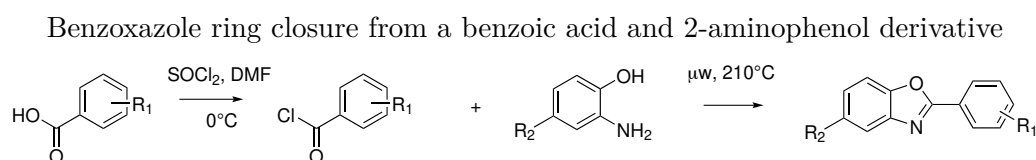

To a suspension of the benzoic acid derivative (1 eq.) in CH<sub>2</sub>Cl<sub>2</sub> at 0 °C was added thionyl chloride (3 eq.) and dimethylformamide (cat.) The reaction mixture was warmed to rt and stirred for 16 h. When the reaction was complete, the reaction mixture was concentrated *in vacuo*, dissolved in Et<sub>2</sub>O and filtered. The filtrate was concentrated *in vacuo* to yield the acid chloride, which was used immediately without further purification.

To a suspension of the 2-aminophenol derivative (1 eq.) in 1,4-dioxane was added a solution of the prepared acid chloride (1 eq.) in 1,4-dioxane at rt. The reaction vessel was heated under microwave activation at 210 °C for 15 min, then cooled to rt. The reaction mixture was poured into NaOH solution (1 M aq.), and extracted with EtOAc three times. The combined organic fractions were dried (Na<sub>2</sub>SO<sub>4</sub>) and concentrated *in vacuo* to yield the crude benzoxazole product.



## General procedure B:

### Formation of benzoxazole carboxamides

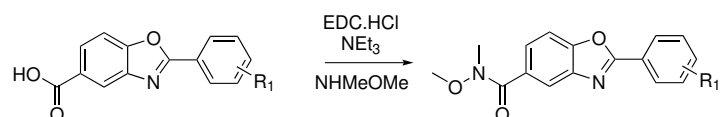

Acid benzoxazole derivatives were obtained by following General Procedure A, with no further purification. To a solution of the crude acid (1 eq.) in DMF was added EDC hydrochloride (2 eq.), *N,O*-dimethylhydroxylamine hydrochloride (2 eq.) and NEt<sub>3</sub> (2 eq.). The reaction mixture was stirred at rt for 16 h, then concentrated *in vacuo*. The residue was dissolved in EtOAc, then washed with citric acid solution (10% aq.), NaHCO<sub>3</sub> solution (10% aq.) and brine. The organic layer was concentrated *in vacuo* to yield the crude carboxamide product.

## General procedure C:

### Formation of trifluoromethylketone oximes from carboxamides

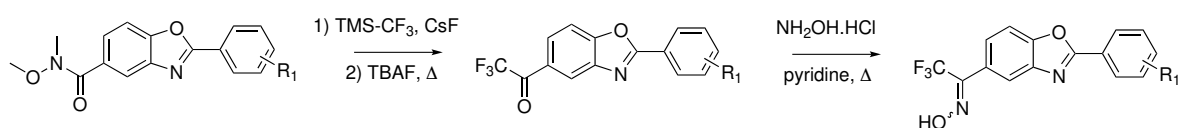

Adapting a known procedure,<sup>[10]</sup> caesium fluoride (0.2 eq.) and trifluoromethyltrimethylsilane (2 eq.) were added to a solution of Weinreb amide derivative (1 eq.) in toluene. The reaction mixture was stirred at rt with further equivalents of caesium fluoride and trifluoromethyltrimethylsilane added every 24 h until the reaction was complete by TLC. At this point, the reaction was concentrated *in vacuo* and the residue dissolved in THF. TBAF (1.2 eq., 1 M in THF) was added dropwise and the reaction stirred at rt for 3 h at 50 °C. The reaction was cooled to rt, diluted with Et<sub>2</sub>O and washed with water and brine. The organic layer was dried (Na<sub>2</sub>SO<sub>4</sub>) and concentrated *in vacuo* to yield the crude trifluoromethyl ketone product. The crude was filtered through a silica plug, eluting with PE : EtOAc (2:1), and concentrated *in vacuo*.

To a solution of the prepared crude trifluoromethylketone derivative (1 eq.) in pyridine (excess) and ethanol over molecular sieves (3 Å) was added hydroxylammonium chloride (3 eq.). The reaction mixture was heated under reflux for 16 h, then concentrated *in vacuo*. The residue was dissolved in EtOAc, washed with brine/water (1:1), dried (Na<sub>2</sub>SO<sub>4</sub>) and concentrated *in vacuo* to yield the crude oxime product.

## General procedure D:

### Formation of trifluoromethylketone tosyl oximes

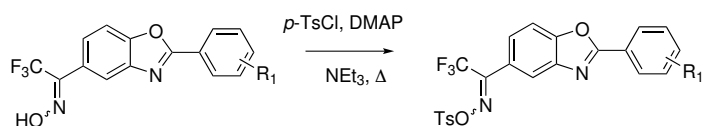

To a solution of oxime (1 eq.), 4-dimethylaminopyridine (0.1 eq.) and triethylamine (3 eq.) in CH<sub>2</sub>Cl<sub>2</sub> was added *p*-toluenesulfonyl chloride (2 eq., recrystallised from PE) portionwise. The reaction mixture was stirred at 40 °C for 16 h, then cooled to rt. The mixture was diluted with CH<sub>2</sub>Cl<sub>2</sub>, washed with water then brine, dried (Na<sub>2</sub>SO<sub>4</sub>) and concentrated *in vacuo* to yield the crude tosyl oxime products in a mixture of E/Z isomers.

### General procedure E:

#### Formation of the diaziridine

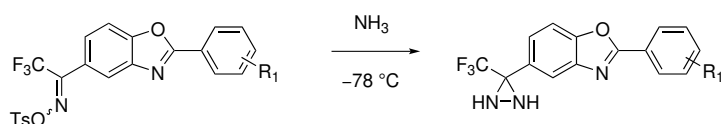

NH<sub>3</sub> (excess) was condensed into a solution of tosyl oxime (1 eq.) in CH<sub>2</sub>Cl<sub>2</sub> at -78 °C. The reaction mixture was stirred and warmed to rt over 6 h, then concentrated *in vacuo* to yield the crude diaziridine product.

### General procedure F:

#### Formation of the diazirine

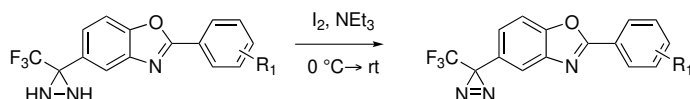

To a solution of diaziridine (1 eq.) and triethylamine (3 eq.) in CH<sub>2</sub>Cl<sub>2</sub> was added iodine (1.2 eq.) portionwise. The reaction mixture was covered in foil to exclude light and stirred for 15 min at rt. The mixture was then concentrated *in vacuo* to yield the crude diazirine product.

### General procedure G:

#### Sonogashira coupling of aryl halide with TMS-acetylene

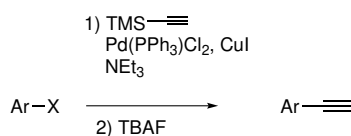

To a solution of aryl halide (1 eq.), bis(triphenylphosphine)palladium(II) dichloride (0.15 eq.) and copper (I) iodide (0.1 eq.) in THF was added NEt<sub>3</sub> (excess) and trimethylsilylacetylene (1 eq.) dropwise. The reaction mixture was degassed, put under a N<sub>2</sub> atmosphere, and stirred at 70 °C until the reaction was complete by TLC. The solvent was removed *in vacuo* and the residue purified by flash column chromatography. The isolated TMS-alkyne intermediate was dissolved in THF and TBAF (1.5 eq., 1 M in THF) was added dropwise. The reaction was stirred at rt until completion. The reaction mixture was diluted with EtOAc, washed with water and the phases separated. The organic layer was dried (Na<sub>2</sub>SO<sub>4</sub>) and concentrated *in vacuo* to yield the crude alkyne product.

## 2-(3-Iodophenyl)-*N*-methoxy-*N*-methylbenzo[*d*]oxazole-5-carboxamide **9**

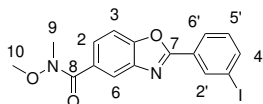

Carboxamide **9** was obtained according to General Procedure B, using 3-iodobenzoic acid (486 mg, 1.96 mmol), thionyl chloride (0.43 mL, 5.88 mmol) and DMF (0.10 mL) in CH<sub>2</sub>Cl<sub>2</sub> (20 mL). The acid chloride intermediate formed was reacted with 3-amino-4-hydroxybenzoic acid (300 mg, 1.96 mmol) in 1,4-dioxane (5 mL). Amide coupling was performed on the crude product using EDC hydrochloride (752 mg, 3.92 mmol), *N,O*-dimethylhydroxylamine hydrochloride (382 mg, 3.92 mmol) and NEt<sub>3</sub> (0.60 mL, 4.31 mmol) in DMF (25 mL). The crude product was purified by flash column chromatography (PE : EtOAc, 7:3) to yield carboxamide **9** (392 mg, 0.960 mmol, 49%) as a white solid.

**R<sub>f</sub>** 0.21 (PE : EtOAc, 7:3); **v<sub>max</sub>** (cm<sup>-1</sup>) 1635 ((C=O)NH), 1450, 1107 (C-N), 1085; **mp** 113-115 °C; **<sup>1</sup>HNMR** (400 MHz, CDCl<sub>3</sub>) δ<sub>H</sub> 8.62 (1H, dd, *J* = 1.3, 1.3 Hz, H<sub>2'</sub>), 8.22 (1H, ddd, *J* = 7.8, 1.3, 1.3 Hz, H<sub>6'</sub>), 8.15 (1H, d, *J* = 1.7 Hz, H<sub>6</sub>), 7.88 (1H, 1H, ddd, *J* = 7.8, 1.3, 1.3 Hz, H<sub>4'</sub>), 7.77 (1H, dd, *J* = 8.5, 1.7 Hz, H<sub>2</sub>), 7.61 (1H, d, *J* = 8.5 Hz, H<sub>3</sub>), 7.27 (1H, dd, *J* = 7.8, 7.8 Hz, H<sub>5'</sub>), 3.57 (3H, s, H<sub>10</sub>), 3.41 (3H, s, H<sub>9</sub>); **<sup>13</sup>CNMR** (125 MHz, CDCl<sub>3</sub>) δ<sub>C</sub> 169.2 (C<sub>8</sub>), 162.5 (C<sub>7</sub>), 152.1 (C<sub>4</sub>), 141.6 (C<sub>4'</sub>), 140.8 (C<sub>5</sub>), 136.6 (C<sub>2'</sub>), 131.0 (C<sub>1</sub>), 130.7 (C<sub>5'</sub>), 128.8 (C<sub>1'</sub>), 126.9 (C<sub>6'</sub>), 126.6 (C<sub>2</sub>), 120.8 (C<sub>6</sub>), 110.5 (C<sub>3</sub>), 94.5 (C<sub>3'</sub>), 61.3 (C<sub>10</sub>), 33.9 (C<sub>9</sub>); **HRMS** (APCI<sup>+</sup>) Calc. for C<sub>16</sub>H<sub>14</sub>IN<sub>2</sub>O<sub>3</sub> [M+H]<sup>+</sup> 409.0043, found 409.0035.

## 2,2,2-Trifluoro-1-(2-(3-iodophenyl)benzo[*d*]oxazol-5-yl)ethan-1-one oxime **10**

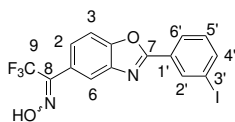

Oxime **10** was obtained according to General Procedure C, using carboxamide **9** (1.45 g, 3.55 mmol), trifluoromethyltrimethylsilane (1.05 mL, 7.10 mmol) and caesium fluoride (108 mg, 0.710 mmol) in toluene (40 mL). The reaction was stirred for three days, with further trifluoromethyltrimethylsilane (1.05 mL, 7.10 mmol) and caesium fluoride (108 mg, 0.710 mmol) added every 24 h. TBAF (4.26 mL, 1 M in THF) was used for desilylation of the intermediate formed. The crude trifluoromethylketone product was dissolved in pyridine (5 mL) and ethanol (25 mL) and refluxed with hydroxylammonium chloride (740 mg, 10.7 mmol). The crude product was purified by flash column chromatography (PE : EtOAc, 9:1) to yield oxime **10** (358 mg, 0.828 mmol, 23%) as a white solid.

**R<sub>f</sub>** 0.28 (PE : EtOAc, 9:1); **v<sub>max</sub>** (cm<sup>-1</sup>) 1547, 1471, 1250 (C-F), 1151 (C-F), 973 (N-O); **mp** 182-184 °C; **<sup>1</sup>HNMR** (500 MHz, CD<sub>3</sub>OD) δ<sub>H</sub> 8.60 (1H, dd, *J* = 1.6, 1.6 Hz, H<sub>2'</sub>), 8.25 (1H, ddd, *J* = 7.8, 1.6, 1.0 Hz, H<sub>6'</sub>), 7.97 (1H, ddd, *J* = 7.8, 1.6, 1.0 Hz, H<sub>4'</sub>), 7.86 (1H, s, H<sub>6</sub>), 7.80 (1H, d, *J* = 8.5 Hz, H<sub>3</sub>), 7.53 (1H, dd, *J* = 8.5, 1.3 Hz, H<sub>2</sub>), 7.36 (1H, dd, *J* = 7.8, 7.8 Hz, H<sub>5'</sub>); **<sup>13</sup>CNMR** (125 MHz, CDCl<sub>3</sub>) δ<sub>C</sub> 163.8 (C<sub>7</sub>), 152.7 (C<sub>4</sub>), 146.5 (q, <sup>2</sup>*J*<sub>C-F</sub> = 32.6 Hz, C<sub>8</sub>), 142.9 (C<sub>5</sub>), 142.2 (C<sub>4'</sub>), 137.5 (C<sub>2'</sub>), 132.0 (C<sub>5'</sub>), 129.7 (C<sub>1'</sub>), 127.9 (C<sub>6'</sub>), 127.8 (C<sub>2</sub>), 125.5 (C<sub>1</sub>), 122.5 (q, <sup>1</sup>*J*<sub>C-F</sub> = 272.5 Hz, C<sub>9</sub>), 121.8 (C<sub>6</sub>), 112.1 (C<sub>3</sub>), 95.1 (C<sub>3'</sub>); **<sup>19</sup>FNMR** (376 MHz, CDCl<sub>3</sub>) δ<sub>F</sub> -66.5 (s); **HRMS** (ES<sup>+</sup>) Calc. for C<sub>15</sub>H<sub>7</sub>F<sub>3</sub>IN<sub>2</sub>O<sub>2</sub> [M-H]<sup>-</sup> 430.9510, found 430.9513.

## 2,2,2-Trifluoro-1-(2-(3-iodophenyl)benzo[*d*]oxazol-5-yl)ethan-1-one *O*-tosyl oxime **11**

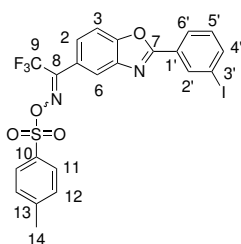

Tosyl oxime **11** was obtained according to General Procedure D, using oxime **10** (358 mg, 0.828 mmol), *p*-toluenesulfonyl chloride (316 mg, 1.66 mmol), 4-dimethylaminopyridine (10.1 mg, 82.8  $\mu$ mol) and NEt<sub>3</sub> (0.35 mL, 2.48 mmol) in CH<sub>2</sub>Cl<sub>2</sub> (20 mL). The crude product was purified by flash column chromatography (PE : EtOAc, 37:3) to yield tosyl oxime **11** (402 mg, 0.685 mmol, 83%) as a pale yellow solid in a mixture of isomers (7:1).

**R<sub>f</sub>** 0.24 (PE : EtOAc, 9:1); **v<sub>max</sub>** (cm<sup>-1</sup>) 2932 (C-H), 1622 (C=N-O), 1391 (S=O), 1250 (C-F), 1181 (S=O), 1149; **mp** 229-231 °C; **<sup>1</sup>HNMR** (500 MHz, CDCl<sub>3</sub>)  $\delta$ <sub>H</sub> 8.64 (1H, dd, *J* = 1.6, 1.6 Hz, H<sub>2'</sub>), 8.25 (1H, ddd, *J* = 7.9, 1.6, 1.0 Hz, H<sub>6'</sub>), 7.94 (1H, ddd, *J* = 7.9, 1.6, 1.0 Hz, H<sub>4'</sub>), 7.93 (2H, d, *J* = 8.4 Hz, H<sub>11</sub>), 7.82 (1H, d, *J* = 1.7 Hz, H<sub>6</sub>), 7.72 (1H, d, *J* = 8.5 Hz, H<sub>3</sub>), 7.46 (1H, dd, *J* = 8.5, 1.7 Hz, H<sub>2</sub>), 7.43 (2H, d, *J* = 8.4 Hz, H<sub>12</sub>), 7.32 (1H, dd, *J* = 7.9, 7.9 Hz, H<sub>5'</sub>), 2.52 (3H, s, H<sub>14</sub>); **<sup>13</sup>CNMR** (125 MHz, CDCl<sub>3</sub>)  $\delta$ <sub>C</sub> 162.9 (C<sub>7</sub>), 153.5 (q, <sup>2</sup>J<sub>C-F</sub> = 33.7 Hz, C<sub>8</sub>), 152.3 (C<sub>4</sub>), 146.3 (C<sub>13</sub>), 142.2 (C<sub>5</sub>), 141.0 (C<sub>4'</sub>), 136.6 (C<sub>2'</sub>), 131.1 (C<sub>10</sub>), 130.7 (C<sub>5'</sub>), 129.9 (C<sub>12</sub>), 129.3 (C<sub>11</sub>), 128.2 (C<sub>1'</sub>), 127.0 (C<sub>6'</sub>), 126.0 (C<sub>2</sub>), 121.2 (C<sub>1</sub>), 121.0 (C<sub>6</sub>), 119.6 (q, <sup>1</sup>J<sub>C-F</sub> = 277.6 Hz, C<sub>9</sub>), 111.5 (C<sub>3</sub>), 94.4 (C<sub>3'</sub>), 21.8 (C<sub>14</sub>); **<sup>19</sup>FNMR** (376 MHz, CDCl<sub>3</sub>)  $\delta$ <sub>F</sub> -66.7 (s); **HRMS** (CI<sup>+</sup>) Calc. for C<sub>22</sub>H<sub>15</sub>F<sub>3</sub>IN<sub>2</sub>O<sub>4</sub> [M+H]<sup>+</sup> 586.9744, found 586.9759.

## 2-(3-Iodophenyl)-5-(3-(trifluoromethyl)diaziridin-3-yl)benzo[d]oxazole **12**

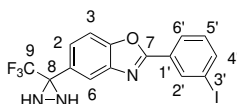

Diaziridine **12** was obtained according to General Procedure E, using tosyl oxime **11** (375 mg, 0.640 mmol) and NH<sub>3</sub> (5 mL) in CH<sub>2</sub>Cl<sub>2</sub> (5 mL). The crude product was purified by flash column chromatography (PE : EtOAc, 4:1) to yield diaziridine **12** (270 mg, 0.626 mmol, 98%) as a white solid.

**R<sub>f</sub>** 0.16 (PE : EtOAc, 9:1); **v<sub>max</sub>** (cm<sup>-1</sup>) 3243 (N-H), 1570 (N-H), 1216 (C-F), 1150; **mp** 128-130 °C; **<sup>1</sup>HNMR** (500 MHz, CDCl<sub>3</sub>)  $\delta$ <sub>H</sub> 8.62 (1H, dd, *J* = 1.7, 1.7 Hz, H<sub>2'</sub>), 8.22 (1H, ddd, *J* = 7.9, 1.7, 1.1 Hz, H<sub>6'</sub>), 8.06 (1H, d, *J* = 1.6 Hz, H<sub>6</sub>), 7.90 (1H, ddd, *J* = 7.9, 1.7, 1.1 Hz, H<sub>4'</sub>), 7.66 (1H, dd, *J* = 8.5, 1.6 Hz, H<sub>2</sub>), 7.63 (1H, d, *J* = 8.5 Hz, H<sub>3</sub>), 7.28 (1H, dd, *J* = 7.9, 7.9 Hz, H<sub>5'</sub>), 2.89 (1H, d, *J* = 8.7 Hz, -NH), 2.32 (1H, d, *J* = 8.7 Hz, -NH); **<sup>13</sup>CNMR** (125 MHz, CDCl<sub>3</sub>)  $\delta$ <sub>C</sub> 162.6 (C<sub>7</sub>), 151.6 (C<sub>4</sub>), 142.2 (C<sub>5</sub>), 140.8 (C<sub>4'</sub>), 136.5 (C<sub>2'</sub>), 130.6 (C<sub>5'</sub>), 128.7 (C<sub>1</sub>), 128.5 (C<sub>1'</sub>), 126.9 (C<sub>6'</sub>), 125.5 (C<sub>2</sub>), 123.5 (q, <sup>1</sup>J<sub>C-F</sub> = 278.2 Hz, C<sub>9</sub>), 120.6 (C<sub>6</sub>), 111.1 (C<sub>3</sub>), 94.4 (C<sub>3'</sub>), 58.2 (q, <sup>2</sup>J<sub>C-F</sub> = 36.2 Hz, C<sub>8</sub>); **<sup>19</sup>FNMR** (376 MHz, CDCl<sub>3</sub>)  $\delta$ <sub>F</sub> -75.5 (s); **HRMS** (ES<sup>+</sup>) Calc. for C<sub>15</sub>H<sub>10</sub>F<sub>3</sub>IN<sub>3</sub>O [M+H]<sup>+</sup> 431.9815, found 431.9815.

## 2-(3-Iodophenyl)-5-(3-(trifluoromethyl)-3H-diazirin-3-yl)benzo[d]oxazole **13**

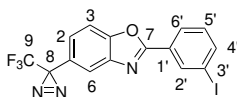

Diazirine **13** was obtained according to General Procedure F, using diaziridine **12** (250 mg, 0.580 mmol), iodine (176 mg, 0.696 mmol) and NEt<sub>3</sub> (0.24 mL, 1.74 mmol) in CH<sub>2</sub>Cl<sub>2</sub> (15 mL). The crude product was purified by flash column chromatography (PE : EtOAc, 19:1 → 9:1) to yield diazirene **13** (242 mg, 0.564 mmol, 97%) as a white solid.

**R<sub>f</sub>** 0.81 (PE : EtOAc, 9:1); **v<sub>max</sub>** (cm<sup>-1</sup>) 1547, 1254 (C-F), 1194, 1154 (C-F), 723; **mp** 101-103 °C; **<sup>1</sup>HNMR** (500 MHz, CDCl<sub>3</sub>)  $\delta$ <sub>H</sub> 8.60 (1H, t, *J* = 1.7 Hz, H<sub>2'</sub>), 8.21 (1H, ddd, *J* = 7.9, 1.7, 1.0 Hz, H<sub>6'</sub>), 7.90 (1H, ddd, *J* = 7.9, 1.7, 1.0 Hz, H<sub>4'</sub>), 7.72 (1H, d, *J* = 1.8 Hz, H<sub>6</sub>), 7.61 (1H, d, *J* = 8.6 Hz, H<sub>3</sub>), 7.28 (1H, t, *J* = 7.9 Hz, H<sub>5'</sub>), 7.20 (1H, dd, *J* = 8.6, 1.8 Hz, H<sub>2</sub>); **<sup>13</sup>CNMR** (125 MHz, CDCl<sub>3</sub>)  $\delta$ <sub>C</sub> 162.9 (C<sub>7</sub>), 151.5 (C<sub>4</sub>), 142.6 (C<sub>5</sub>), 141.0 (C<sub>4'</sub>), 136.7 (C<sub>2'</sub>), 130.8 (C<sub>5'</sub>), 128.5 (C<sub>1'</sub>), 127.0 (C<sub>6'</sub>), 126.0 (C<sub>1</sub>), 124.1 (C<sub>2</sub>), 122.3 (q, <sup>1</sup>J<sub>C-F</sub> = 274.7 Hz, C<sub>9</sub>), 119.5 (C<sub>6</sub>), 111.5 (C<sub>3</sub>), 94.6 (C<sub>3'</sub>), 28.7 (q, <sup>2</sup>J<sub>C-F</sub> = 40.6 Hz, C<sub>8</sub>); **<sup>19</sup>FNMR** (376 MHz, CD<sub>3</sub>OD)  $\delta$ <sub>F</sub> -67.4 (s); **HRMS** (ES<sup>+</sup>) Calc. for C<sub>15</sub>H<sub>8</sub>F<sub>3</sub>IN<sub>3</sub>O [M+H]<sup>+</sup> 429.9659, found 429.9655.

## 2-(3-Ethynylphenyl)-5-(3-(trifluoromethyl)-3*H*-diazirin-3-yl)benzo[*d*]oxazole **2**

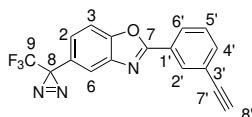

Diazirine **2** was obtained according to General Procedure G, using diazirine **13** (100 mg, 0.233 mmol), bis(triphenylphosphine)palladium(II) dichloride (24.5 mg, 35.0  $\mu$ mol), copper(I) iodide (4.44 mg, 23.3  $\mu$ mol),  $\text{NEt}_3$  (0.70 mL) and trimethylsilylacetylene (40  $\mu$ L, 0.280 mmol) in THF (10 mL). The reaction was complete after 1 h. The TMS-protected alkyne intermediate formed was purified by flash column chromatography (PE : EtOAc, 1:0  $\rightarrow$  99:1), then deprotected with TBAF (0.70 mL, 1 M in THF) in THF (5 mL). The reaction was complete after 30 min. The crude product was purified by flash column chromatography (PE : EtOAc, 1:0  $\rightarrow$  49:1) to yield alkyne **2** (53.2 mg, 0.163 mmol, 70%) as a white solid.

$R_f$  0.62 (PE : EtOAc, 49:1);  $\nu_{\text{max}}$  ( $\text{cm}^{-1}$ ) 3310 (sharp, alkyne C-H), 1556, 1259 (C-F), 1197, 1154, 803;  $\text{mp}$  105-107  $^{\circ}\text{C}$ ;  $^1\text{HNMR}$  (500 MHz,  $\text{CDCl}_3$ )  $\delta_{\text{H}}$  8.40 (1H, dd,  $J = 1.7, 1.7$  Hz,  $\text{H}_{2'}$ ), 8.25 (1H, ddd,  $J = 7.9, 1.4, 1.4$  Hz,  $\text{H}_{6'}$ ), 7.75 (1H, d,  $J = 1.3$  Hz,  $\text{H}_6$ ), 7.70 (1H, ddd,  $J = 7.9, 1.4, 1.4$  Hz,  $\text{H}_{4'}$ ), 7.64 (1H, d,  $J = 8.6$  Hz,  $\text{H}_3$ ), 7.54 (1H, dd,  $J = 7.9, 7.9$  Hz,  $\text{H}_{5'}$ ), 7.24 (1H, dd,  $J = 8.6, 1.3$  Hz,  $\text{H}_2$ ), 3.20 (1H, s,  $\text{H}_{8'}$ );  $^{13}\text{CNMR}$  (125 MHz,  $\text{CDCl}_3$ )  $\delta_{\text{C}}$  163.6 ( $\text{C}_7$ ), 151.4 ( $\text{C}_4$ ), 142.6 ( $\text{C}_5$ ), 135.4 ( $\text{C}_{4'}$ ), 131.4 ( $\text{C}_{2'}$ ), 129.1 ( $\text{C}_{5'}$ ), 127.9 ( $\text{C}_{6'}$ ), 126.9 ( $\text{C}_{1'}$ ), 125.8 ( $\text{C}_1$ ), 123.9 ( $\text{C}_2$ ), 123.3 ( $\text{C}_{3'}$ ), 122.2 (q,  $^1J_{\text{C-F}} = 274.7$  Hz,  $\text{C}_9$ ), 119.3 ( $\text{C}_6$ ), 111.3 ( $\text{C}_3$ ), 82.4 ( $\text{C}_{7'}$ ), 78.6 ( $\text{C}_{8'}$ ), 28.7 (q,  $^2J_{\text{C-F}} = 40.7$  Hz,  $\text{C}_8$ );  $^{19}\text{FNMR}$  (376 MHz,  $\text{CD}_3\text{OD}$ )  $\delta_{\text{F}}$  -67.4 (s);  $\text{HRMS}$  ( $\text{ES}^+$ ) Calc. for  $\text{C}_{17}\text{H}_9\text{F}_3\text{N}_3\text{O}$   $[\text{M}+\text{H}]^+$  328.0692, found 328.0691.

## 2-(4-Iodophenyl)-*N*-methoxy-*N*-methylbenzo[*d*]oxazole-5-carboxamide **14**

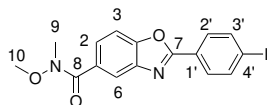

Carboxamide **14** was obtained according to General Procedure B, using 4-iodobenzoic acid (500 mg, 2.01 mmol), thionyl chloride (0.44 mL, 6.03 mmol) and DMF (0.10 mL) in  $\text{CH}_2\text{Cl}_2$  (20 mL). The acid chloride intermediate formed was added to a solution of 3-amino-4-hydroxybenzoic acid (277 mg, 1.81 mmol, 0.9 eq.) in 1,4-dioxane (5 mL). Amide coupling was performed on the crude product using EDC hydrochloride (769 mg, 4.02 mmol), *N,O*-dimethylhydroxylamine hydrochloride (392 mg, 4.02 mmol) and  $\text{NEt}_3$  (0.56 mL, 4.01 mmol) in DMF (25 mL). The crude product was purified by flash column chromatography (PE : EtOAc, 3:1) to yield carboxamide **14** (281 mg, 0.688 mmol, 38%) as a white solid.

$R_f$  0.11 (PE : EtOAc, 9:1);  $\nu_{\text{max}}$  ( $\text{cm}^{-1}$ ) 2980 (C-H), 1636 ((C=O)NH), 1396, 1261, 1060;  $\text{mp}$  143-144  $^{\circ}\text{C}$ ;  $^1\text{HNMR}$  (400 MHz,  $\text{CDCl}_3$ )  $\delta_{\text{H}}$  8.13 (1H, d,  $J = 1.6$  Hz,  $\text{H}_6$ ), 7.95 (2H, m,  $\text{H}_{2'}$ ), 7.87 (2H, m,  $\text{H}_{3'}$ ), 7.75 (1H, dd,  $J = 1.6, 8.6$  Hz,  $\text{H}_2$ ), 7.58 (1H, d,  $J = 8.6$  Hz,  $\text{H}_3$ ), 3.55 (3H, s,  $\text{H}_{10}$ ), 3.39 (3H, s,  $\text{H}_9$ );  $^{13}\text{CNMR}$  (125 MHz,  $\text{CDCl}_3$ )  $\delta_{\text{C}}$  169.2 ( $\text{C}_8$ ), 163.4 ( $\text{C}_7$ ), 152.1 ( $\text{C}_4$ ), 141.7 ( $\text{C}_5$ ), 138.4 ( $\text{C}_{3'}$ ), 130.9 ( $\text{C}_1$ ), 129.2 ( $\text{C}_{2'}$ ), 126.5 ( $\text{C}_2$ ), 126.3 ( $\text{C}_{1'}$ ), 120.7 ( $\text{C}_6$ ), 110.4 ( $\text{C}_3$ ), 99.1 ( $\text{C}_{4'}$ ), 61.2 ( $\text{C}_{10}$ ), 33.9 ( $\text{C}_9$ );  $\text{HRMS}$  ( $\text{ES}^+$ ) Calc. for  $\text{C}_{16}\text{H}_{14}\text{IN}_2\text{O}_3$   $[\text{M}+\text{H}]^+$  409.0043, found 409.0041.

## 2,2,2-Trifluoro-1-(2-(4-iodophenyl)benzo[*d*]oxazol-5-yl)ethan-1-one oxime **15**

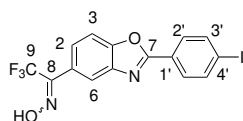

Oxime **15** was obtained according to General Procedure C, using carboxamide **14** (1.55 g, 3.81 mmol), trifluoromethyltrimethylsilane (1.13 mL, 7.62 mmol) and caesium fluoride (116 mg, 0.762

mmol) in toluene (50 mL). The reaction was stirred for three days, with further trifluoromethyltrimethylsilane (1.13 mL, 7.62 mmol) and caesium fluoride (116 mg, 0.762 mmol) added every 24 h. TBAF (4.57 mL, 1 M in THF) was used for desilylation of the intermediate formed. The crude trifluoromethylketone product was dissolved in pyridine (5 mL) and ethanol (25 mL) and refluxed after addition of hydroxylammonium chloride (794 mg, 11.4 mmol). The crude product was purified by flash column chromatography (PE : EtOAc, 9:1 → 4:1) to yield oxime **15** (527 mg, 1.22 mmol, 32%) as a pale green solid.

**R<sub>f</sub>** 0.69 (PE : EtOAc, 4:1); **v<sub>max</sub>** (cm<sup>-1</sup>) 1476 (aromatic C=C), 1259 (C-F), 1151 (C-F), 970 (N-O); **mp** 197-199 °C; **<sup>1</sup>HNMR** (400 MHz, CDCl<sub>3</sub>) δ<sub>H</sub> 7.97 (2H, m, H<sub>3'</sub>), 7.95 (1H, d, *J* = 1.2 Hz, H<sub>6</sub>), 7.91 (2H, m, H<sub>2'</sub>), 7.68 (1H, d, *J* = 8.4 Hz, H<sub>3</sub>), 7.51 (1H, dd, *J* = 8.4, 1.2 Hz, H<sub>2</sub>); **<sup>13</sup>CNMR** (125 MHz, CDCl<sub>3</sub>) δ<sub>C</sub> 165.1 (C<sub>7</sub>), 152.9 (C<sub>4</sub>), 145.1 (q, <sup>2</sup>*J*<sub>C-F</sub> = 32.6 Hz, C<sub>8</sub>), 143.3 (C<sub>5</sub>), 139.9 (C<sub>3'</sub>), 130.4 (C<sub>2'</sub>), 128.0 (C<sub>1</sub>), 127.5 (C<sub>2</sub>), 125.8 (C<sub>1'</sub>), 121.9 (C<sub>6</sub>), 120.9 (q, <sup>1</sup>*J*<sub>C-F</sub> = 271.9 Hz, C<sub>9</sub>), 112.3 (C<sub>3</sub>), 100.3 (C<sub>4'</sub>); **<sup>19</sup>FNMR** (376 MHz, CDCl<sub>3</sub>) δ<sub>F</sub> -67.5 (s); **HRMS** (ES<sup>+</sup>) Calc. for C<sub>15</sub>H<sub>7</sub>F<sub>3</sub>IN<sub>2</sub>O<sub>2</sub> [M-H]<sup>-</sup> 430.9510, found 430.9513.

## 2,2,2-Trifluoro-1-(2-(4-iodophenyl)benzo[d]oxazol-5-yl)ethan-1-one *O*-tosyl oxime **16**

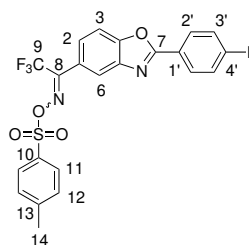

Tosyl oxime **16** was obtained according to General Procedure D, using oxime **15** (1.80 g, 4.17 mmol), *p*-toluenesulfonyl chloride (1.59 g, 8.33 mmol), 4-dimethylaminopyridine (50.9 mg, 0.417 mmol) and NEt<sub>3</sub> (1.73 mL, 12.5 mmol) in CH<sub>2</sub>Cl<sub>2</sub> (50 mL). The crude product was purified by flash column chromatography (PE : EtOAc, 19:1 → 4:1) to yield tosyl oxime **16** (1.35 g, 2.30 mmol, 55%) as a pale yellow solid in a mixture of isomers (2:1).

**v<sub>max</sub>** (cm<sup>-1</sup>) 2981 (C-H), 1622 (C=N-O), 1394 (S=O), 1245 (C-F), 1194 (S=O), 1159; **mp** 171-173 °C;

Major isomer: **R<sub>f</sub>** 0.45 (PE : EtOAc, 17:3); **<sup>1</sup>HNMR** (500 MHz, CDCl<sub>3</sub>) δ<sub>H</sub> 7.97 (2H, m, H<sub>3'</sub>), 7.92 (2H, m, H<sub>2'</sub>), 7.90 (2H, d, *J* = 8.1 Hz, H<sub>11</sub>), 7.81 (1H, d, *J* = 1.6 Hz, H<sub>6</sub>), 7.68 (1H, d, *J* = 8.5 Hz, H<sub>3</sub>), 7.42 (1H, dd, *J* = 8.5, 1.6 Hz, H<sub>2</sub>), 7.40 (2H, d, *J* = 8.1 Hz, H<sub>12</sub>), 2.49 (3H, s, H<sub>14</sub>). **<sup>13</sup>CNMR** (125 MHz, CDCl<sub>3</sub>) δ<sub>C</sub> 163.9 (C<sub>7</sub>), 153.6 (q, <sup>2</sup>*J*<sub>C-F</sub> = 33.5 Hz, C<sub>8</sub>), 152.3 (C<sub>4</sub>), 146.3 (C<sub>13</sub>), 142.3 (C<sub>5</sub>), 138.4 (C<sub>3'</sub>), 131.1 (C<sub>10</sub>), 129.9 (C<sub>12</sub>), 129.3 (C<sub>11</sub>), 129.2 (C<sub>2'</sub>), 125.9 (C<sub>2</sub>), 125.8 (C<sub>10</sub>), 121.1 (C<sub>1</sub>), 120.9 (C<sub>6</sub>), 119.6 (q, <sup>1</sup>*J*<sub>C-F</sub> = 281.3 Hz, C<sub>9</sub>), 111.4 (C<sub>3</sub>), 99.4 (C<sub>4'</sub>), 21.8 (C<sub>14</sub>); **<sup>19</sup>FNMR** (376 MHz, CDCl<sub>3</sub>) δ<sub>F</sub> -66.7 (s).

Minor isomer: **R<sub>f</sub>** 0.39 (PE : EtOAc, 17:3); **<sup>1</sup>HNMR** (500 MHz, CDCl<sub>3</sub>) δ<sub>H</sub> 7.96 (2H, m, H<sub>3'</sub>), 7.91 (2H, m, H<sub>2'</sub>), 7.89 (2H, d, *J* = 8.1 Hz, H<sub>11</sub>), 7.85 (1H, d, *J* = 1.6 Hz, H<sub>6</sub>), 7.63 (1H, d, *J* = 8.5 Hz, H<sub>3</sub>), 7.48 (1H, dd, *J* = 8.5, 1.6 Hz, H<sub>2</sub>), 7.39 (2H, d, *J* = 8.1 Hz, H<sub>12</sub>), 2.48 (3H, s, H<sub>14</sub>). **<sup>13</sup>CNMR** (125 MHz, CDCl<sub>3</sub>) δ<sub>C</sub> 163.9 (C<sub>7</sub>), 153.6 (q, <sup>2</sup>*J*<sub>C-F</sub> = 33.5 Hz, C<sub>8</sub>), 152.7 (C<sub>4</sub>), 146.1 (C<sub>13</sub>), 142.3 (C<sub>5</sub>), 138.4 (C<sub>3'</sub>), 131.4 (C<sub>10</sub>), 123.0 (C<sub>12</sub>), 129.3 (C<sub>11</sub>), 129.1 (C<sub>2'</sub>), 125.9 (C<sub>2</sub>), 125.8 (C<sub>10</sub>), 121.2 (C<sub>1</sub>), 120.9 (C<sub>6</sub>), 119.6 (q, <sup>1</sup>*J*<sub>C-F</sub> = 281.3 Hz, C<sub>9</sub>), 111.1 (C<sub>3</sub>), 99.5 (C<sub>4'</sub>), 21.8 (C<sub>14</sub>); **<sup>19</sup>FNMR** (376 MHz, CDCl<sub>3</sub>) δ<sub>F</sub> -66.7 (s);

**HRMS** (ES<sup>+</sup>) Calc. for C<sub>22</sub>H<sub>15</sub>F<sub>3</sub>IN<sub>2</sub>O<sub>4</sub>S [M+H]<sup>+</sup> 586.9744, found 586.9741.

## 2-(4-Iodophenyl)-5-(3-(trifluoromethyl)diaziridin-3-yl)benzo[d]oxazole **17**

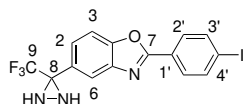

Diaziridine **17** was obtained according to General Procedure E, using tosyl oxime **16** (1.82 g, 3.11 mmol) and NH<sub>3</sub> (5 mL) in CH<sub>2</sub>Cl<sub>2</sub> (25 mL). The crude product was purified by flash column chromatography (PE : EtOAc, 4:1) to yield diaziridine **17** (1.05 g, 2.43 mmol, 78%) as a pale yellow solid.

**R<sub>f</sub>** 0.39 (PE : EtOAc, 4:1); **v<sub>max</sub>** (cm<sup>-1</sup>) 1593 (N-H), 1479, 1397, 1216 (C-F), 1150; **mp** 152-154 °C; **<sup>1</sup>HNMR** (500 MHz, CDCl<sub>3</sub>) δ<sub>H</sub> 8.05 (1H, d, *J* = 1.5 Hz, H<sub>6</sub>), 7.97 (2H, m, H<sub>3'</sub>), 7.90 (2H, m, H<sub>2'</sub>), 7.66 (1H, dd, *J* = 8.5, 1.5 Hz, H<sub>2</sub>), 7.62 (1H, d, *J* = 8.5 Hz, H<sub>3</sub>), 2.89 (1H, d, *J* = 8.9 Hz, -NH), 2.32 (1H, d, *J* = 8.9 Hz, -NH); **<sup>13</sup>CNMR** (125 MHz, CDCl<sub>3</sub>) δ<sub>C</sub> 164.0 (C<sub>7</sub>), 152.0 (C<sub>4</sub>), 142.7 (C<sub>5</sub>), 138.7 (C<sub>2'</sub>), 129.5 (C<sub>3'</sub>), 129.0 (C<sub>1</sub>), 126.5 (C<sub>1'</sub>), 125.8 (C<sub>2</sub>), 123.5 (q, <sup>1</sup>*J*<sub>C-F</sub> = 277.6 Hz, C<sub>9</sub>), 120.9 (C<sub>6</sub>), 111.4 (C<sub>3</sub>), 99.5 (C<sub>4'</sub>), 58.2 (q, <sup>2</sup>*J*<sub>C-F</sub> = 36.2 Hz, C<sub>8</sub>); **<sup>19</sup>FNMR** (376 MHz, CDCl<sub>3</sub>) δ<sub>F</sub> -75.5 (s); **HRMS** (ES<sup>+</sup>) Calc. for C<sub>15</sub>H<sub>10</sub>F<sub>3</sub>IN<sub>3</sub>O [M+H]<sup>+</sup> 431.9815, found 431.9815.

## 2-(4-Iodophenyl)-5-(3-(trifluoromethyl)-3*H*-diazirin-3-yl)benzo[*d*]oxazole **18**

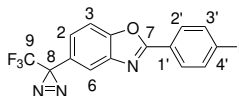

Diazirine **18** was obtained according to General Procedure F, using diaziridine **17** (580 mg, 1.35 mmol), iodine (409 mg, 1.61 mmol) and NEt<sub>3</sub> (0.56 mL, 4.04 mmol) in CH<sub>2</sub>Cl<sub>2</sub> (25 mL). The crude product was purified by flash column chromatography (PE : EtOAc, 19:1 → 9:1) to yield diazirine **18** (564 mg, 1.31 mmol, 98%) as a white solid.

**R<sub>f</sub>** 0.84 (PE : EtOAc, 9:1); **v<sub>max</sub>** (cm<sup>-1</sup>) 1478, 1397, 1252 (C-F), 1150, 810; **mp** 117-119 °C; **<sup>1</sup>HNMR** (500 MHz, CDCl<sub>3</sub>) δ<sub>H</sub> 7.95 (2H, m, H<sub>3'</sub>), 7.89 (2H, m, H<sub>2'</sub>), 7.71 (1H, d, *J* = 1.8 Hz, H<sub>6</sub>), 7.59 (1H, d, *J* = 8.5 Hz, H<sub>3</sub>), 7.20 (1H, dd, *J* = 8.5, 1.8 Hz, H<sub>2</sub>); **<sup>13</sup>CNMR** (125 MHz, CDCl<sub>3</sub>) δ<sub>C</sub> 164.0 (C<sub>7</sub>), 151.5 (C<sub>4</sub>), 142.7 (C<sub>5</sub>), 138.5 (C<sub>2'</sub>), 129.3 (C<sub>3'</sub>), 126.1 (C<sub>1'</sub>), 125.9 (C<sub>1</sub>), 124.0 (C<sub>2</sub>), 122.2 (q, <sup>1</sup>*J*<sub>C-F</sub> = 274.7 Hz, C<sub>9</sub>), 119.3 (C<sub>6</sub>), 111.4 (C<sub>3</sub>), 99.4 (C<sub>4'</sub>). 28.7 (q, <sup>2</sup>*J*<sub>C-F</sub> = 40.7 Hz, C<sub>8</sub>); **<sup>19</sup>FNMR** (376 MHz, CD<sub>3</sub>OD) δ<sub>F</sub> -67.4 (s); **HRMS** (ES<sup>+</sup>) Calc. for C<sub>15</sub>H<sub>8</sub>F<sub>3</sub>IN<sub>3</sub>O [M+H]<sup>+</sup> 429.9659, found 429.9655.

## 2-(4-Ethynylphenyl)-5-(3-(trifluoromethyl)-3*H*-diazirin-3-yl)benzo[*d*]oxazole **3**

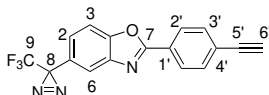

Diazirine **3** was obtained according to General Procedure G, using diazirine **18** (100 mg, 0.233 mmol), bis(triphenylphosphine)palladium(II) dichloride (24.5 mg, 35.0 μmol), copper(I) iodide (4.44 mg, 23.3 μmol), NEt<sub>3</sub> (0.70 mL) and trimethylsilylacetylene (39 μL, 0.280 mmol) in THF (10 mL). The reaction was complete after 1 h. The TMS-protected alkyne intermediate formed was purified by flash column chromatography (PE : EtOAc, 1:0 → 49:1), then deprotected with TBAF (0.70 mL, 1 M in THF) in THF (5 mL). The reaction was complete after 30 min. The crude product was purified by flash column chromatography (PE : EtOAc, 1:0 → 49:1) to yield alkyne **3** (38.2 mg, 0.117 mmol, 50%) as a white solid.

**R<sub>f</sub>** 0.69 (PE : EtOAc, 49:1); **v<sub>max</sub>** (cm<sup>-1</sup>) 3311 (sharp, alkyne C-H), 1262 (C-F), 1149, 810, 740; **mp** 125-127 °C; **<sup>1</sup>HNMR** (500 MHz, CDCl<sub>3</sub>) δ<sub>H</sub> 8.20 (2H, m, H<sub>2'</sub>), 7.72 (1H, d, *J* = 1.8 Hz, H<sub>6</sub>), 7.64 (2H, m, H<sub>3'</sub>), 7.60 (1H, d, *J* = 8.6 Hz, H<sub>3</sub>), 7.20 (1H, dd, *J* = 8.6, 1.8 Hz, H<sub>2</sub>), 3.26 (1H, s, H<sub>6'</sub>); **<sup>13</sup>CNMR** (125 MHz, CDCl<sub>3</sub>) δ<sub>C</sub> 163.9 (C<sub>7</sub>), 151.5 (C<sub>4</sub>), 142.8 (C<sub>5</sub>), 132.9 (C<sub>3'</sub>), 127.8 (C<sub>2'</sub>), 126.7 (C<sub>4'</sub>), 126.0 (C<sub>1'</sub>), 125.9 (C<sub>1</sub>), 124.0 (C<sub>2</sub>), 122.3 (q, <sup>1</sup>*J*<sub>C-F</sub> = 274.7 Hz, C<sub>9</sub>), 119.4 (C<sub>6</sub>), 111.4 (C<sub>3</sub>), 82.9 (C<sub>5'</sub>), 80.4 (C<sub>6'</sub>), 28.8 (q, <sup>2</sup>*J*<sub>C-F</sub> = 40.6 Hz, C<sub>8</sub>); **<sup>19</sup>FNMR** (376 MHz, CD<sub>3</sub>OD) δ<sub>F</sub> -67.4 (s); **HRMS** (ES<sup>+</sup>) Calc. for C<sub>17</sub>H<sub>9</sub>F<sub>3</sub>N<sub>3</sub>O [M+H]<sup>+</sup> 328.0692, found 328.0691.

## 2-(5-Bromonaphthalen-1-yl)-*N*-methoxy-*N*-methylbenzo[*d*]oxazole-5-carboxamide **19**

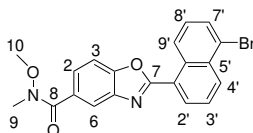

Carboxamide **19** was obtained by a procedure based on General Procedure B except with the addition of 1-hydroxybenzotriazole in the amide coupling. 5-Bromonaphthoic acid (502 mg, 2.00 mmol), thionyl chloride (0.44 mL, 6.00 mmol) and DMF (0.10 mL) were used in CH<sub>2</sub>Cl<sub>2</sub> (20 mL). The acid chloride intermediate formed was reacted with 3-amino-4-hydroxybenzoic acid (277 mg, 1.80 mmol, 0.9 eq.) in 1,4-dioxane (5 mL). Amide coupling was performed on the crude product using EDC hydrochloride (575 mg, 3.00 mmol, 1.5 eq.), *N,O*-dimethylhydroxylamine hydrochloride (293 mg, 3.00 mmol, 1.5 eq.), 1-hydroxybenzotriazole (135 mg, 1.00 mmol, 0.5 eq.) and NEt<sub>3</sub> (0.42 mL, 3.00 mmol, 1.5 eq.) in DMF (25 mL). The crude product was purified by flash column chromatography (PE : EtOAc, 1:1) to yield carboxamide **20** (459 mg, 1.12 mmol, 62%) as a white solid.

**R<sub>f</sub>** 0.54 (PE : EtOAc, 1:1); **v<sub>max</sub>** (cm<sup>-1</sup>) 2930 (C-H), 1679 ((C=O)NH), 1460, 1251; **mp** 137-138 °C; **<sup>1</sup>HNMR** (500 MHz, CDCl<sub>3</sub>) δ<sub>H</sub> 9.48 (1H, ddd, *J* = 8.7, 1.0, 1.0 Hz, H<sub>9'</sub>), 8.48 (1H, ddd, *J* = 8.6, 1.1, 1.1 Hz, H<sub>4'</sub>), 8.43 (1H, dd, *J* = 7.3, 1.1 Hz, H<sub>2'</sub>), 8.24 (1H, d, *J* = 1.6 Hz, H<sub>6</sub>), 7.87 (1H, dd, *J* = 7.4, 1.1 Hz, H<sub>7'</sub>), 7.80 (1H, dd, *J* = 8.4, 1.6 Hz, H<sub>2</sub>), 7.67 (1H, dd, *J* = 8.5, 7.3 Hz, H<sub>3'</sub>), 7.64 (1H, d, *J* = 8.4 Hz, H<sub>3</sub>), 7.50 (1H, dd, *J* = 8.7, 7.4 Hz, H<sub>8'</sub>), 3.59 (3H, s, H<sub>10</sub>), 3.42 (3H, s, H<sub>9</sub>); **<sup>13</sup>CNMR** (125 MHz, CDCl<sub>3</sub>) δ<sub>C</sub> 169.2 (C<sub>8</sub>), 163.2 (C<sub>7</sub>), 151.4 (C<sub>4</sub>), 141.8 (C<sub>5</sub>), 132.4 (C<sub>5'</sub>), 132.0 (C<sub>10'</sub>), 131.6 (C<sub>4'</sub>), 130.9 (C<sub>7'</sub>), 130.7 (C<sub>1</sub>), 130.2 (C<sub>2'</sub>), 128.2 (C<sub>8'</sub>), 126.5 (C<sub>2</sub>), 126.3 (C<sub>3'</sub>), 126.2 (C<sub>9</sub>), 123.6 (C<sub>1'</sub> or C<sub>6'</sub>), 123.5 (C<sub>1'</sub> or C<sub>6'</sub>), 120.8 (C<sub>6</sub>), 110.2 (C<sub>3</sub>), 61.1 (C<sub>10</sub>), 33.9 (C<sub>9</sub>); **HRMS** (ES<sup>+</sup>) Calc. for C<sub>20</sub>H<sub>16</sub><sup>79</sup>BrN<sub>2</sub>O<sub>3</sub> [M+H]<sup>+</sup> 411.0339, found 411.0339.

## 1-(2-(5-Bromonaphthalen-1-yl)benzo[*d*]oxazol-5-yl)-2,2,2-trifluoroethan-1-one oxime **21**

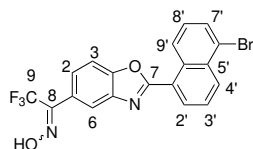

Oxime **21** was obtained according to General Procedure C, using carboxamide **22** (1.18 g, 2.87 mmol), trifluoromethyltrimethylsilane (0.85 mL, 5.74 mmol) and caesium fluoride (87.2 mg, 0.574 mmol) in toluene (40 mL). The reaction was stirred for three days, with further trifluoromethyltrimethylsilane (0.85 mL, 5.74 mmol) and caesium fluoride (87.2 mg, 0.574 mmol) added every 24 h. TBAF (3.44 mL, 1 M in THF) was used for desilylation of the intermediate formed. The crude trifluoromethylketone product was dissolved in pyridine (5 mL) and ethanol (25 mL) and refluxed with hydroxylammonium chloride (598 mg, 8.61 mmol). The crude product was purified by flash column chromatography (PE : EtOAc, 9:1) to yield oxime **21** (699 mg, 1.61 mmol, 56%) as a yellow solid.

**R<sub>f</sub>** 0.31 (PE : EtOAc, 9:1); **v<sub>max</sub>** (cm<sup>-1</sup>) 3223 (-OH), 2981 (C-H), 1696 (C=N-OH), 1253 (C-F), 1154; **mp** 182-183 °C; **<sup>1</sup>HNMR** (500 MHz, (CD<sub>3</sub>)<sub>2</sub>CO) δ<sub>H</sub> 11.96 (1H, *br s*, -OH), 9.63 (1H, ddd, *J* = 8.7, 1.1, 1.1 Hz, H<sub>9'</sub>), 8.61 (1H, dd, *J* = 7.4, 1.1 Hz, H<sub>2'</sub>), 8.57 (1H, ddd, *J* = 8.6, 1.1, 1.1 Hz, H<sub>4'</sub>), 8.06 (1H, s, H<sub>6</sub>), 8.05 (1H, *obs m*, H<sub>7'</sub>), 7.81 (1H, d, *J* = 8.4 Hz, H<sub>3</sub>), 7.76 (1H, dd, *J* = 8.6, 7.4 Hz, H<sub>3'</sub>), 7.67 (1H, dd, *J* = 8.7, 7.6 Hz, H<sub>8'</sub>), 7.65 (1H, dd, *J* = 8.4, 1.6 Hz, H<sub>2</sub>); **<sup>13</sup>CNMR** (125 MHz, CDCl<sub>3</sub>) δ<sub>C</sub> 163.8 (C<sub>7</sub>), 151.9 (C<sub>8</sub>), 151.7 (C<sub>4</sub>), 143.1 (C<sub>5</sub>), 133.1 (C<sub>1</sub>), 132.8 (C<sub>5'</sub>), 132.2 (C<sub>10'</sub>), 132.0 (C<sub>4'</sub>), 131.5 (C<sub>7'</sub>), 131.4 (C<sub>2'</sub>), 129.3 (C<sub>8'</sub>), 127.8 (C<sub>3'</sub>), 127.5 (C<sub>2</sub>), 127.4 (C<sub>9'</sub>), 124.6 (C<sub>1'</sub>), 123.7 (C<sub>6'</sub>), 122.2 (q, <sup>1</sup>*J*<sub>C-F</sub> = 273.1 Hz, C<sub>9</sub>), 121.9 (C<sub>6</sub>), 111.8 (C<sub>3</sub>); **<sup>19</sup>FNMR** (376 MHz, CDCl<sub>3</sub>) δ<sub>F</sub> -67.6 (s); **HRMS** (ES<sup>+</sup>) Calc. for C<sub>19</sub>H<sub>11</sub>F<sub>3</sub><sup>79</sup>BrN<sub>2</sub>O<sub>2</sub> [M+H]<sup>+</sup> 434.9951, found 434.9951.



**1-(2-(5-Bromonaphthalen-1-yl)benzo[*d*]oxazol-5-yl)-2,2,2-trifluoroethan-1-one *O*-tosyl oxime **23****

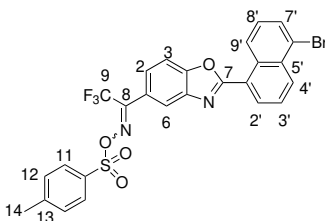

Tosyl oxime **23** was obtained according to General Procedure D, using oxime **24** (818 mg, 1.88 mmol), *p*-toluenesulfonyl chloride (717 mg, 3.76 mmol), 4-dimethylaminopyridine (23.0 mg, 0.188 mmol) and NEt<sub>3</sub> (0.78 mL, 5.64 mmol) in CH<sub>2</sub>Cl<sub>2</sub> (30 mL). The crude product was purified by flash column chromatography (PE : EtOAc, 19:1) to yield tosyl oxime **23** (820 mg, 1.39 mmol, 74%) as a pale yellow solid in a mixture of isomers (50:50).

**v**<sub>max</sub> (cm<sup>-1</sup>) 2980 (C-H), 1334 (S=O), 1255 (C-F), 1196 (S=O), 1154; **mp** 148-150 °C;

Minor isomer: **R**<sub>f</sub> (0.35, PE : EtOAc, 19:1); <sup>1</sup>HNMR (500 MHz, CDCl<sub>3</sub>) δ<sub>H</sub> 9.48 (1H, ddd, *J* = 8.8, 1.0, 1.0 Hz, H<sub>9'</sub>), 8.54 (1H, ddd, *J* = 8.6, 1.1, 1.1 Hz, H<sub>4'</sub>), 8.46 (1H, dd, *J* = 7.3, 1.2 Hz, H<sub>2'</sub>), 7.94-7.89 (4H, m, H<sub>6</sub>, H<sub>7'</sub> and H<sub>11</sub>), 7.73 (1H, d, *J* = 8.4 Hz, H<sub>3</sub>), 7.71 (1H, dd, *J* = 8.6, 7.3 Hz, H<sub>3'</sub>), 7.54 (1H, dd, *J* = 8.8, 7.4 Hz, H<sub>8'</sub>), 7.47 (1H, dd, *J* = 8.5, 1.7 Hz, H<sub>2</sub>), 7.41 (2H, m, H<sub>12</sub>), 2.49 (3H, s, H<sub>14</sub>); <sup>13</sup>CNMR (125 MHz, CDCl<sub>3</sub>) δ<sub>C</sub> 163.8 (C<sub>7</sub>), 153.7 (q, <sup>2</sup>*J*<sub>C-F</sub> = 34.1 Hz, C<sub>8</sub>), 151.8 (C<sub>4</sub>), 146.2 (C<sub>14</sub>), 142.6 (C<sub>5</sub>), 132.6 (C<sub>5'</sub>), 132.2 (C<sub>10'</sub>), 132.1 (C<sub>4'</sub>), 131.3 (C<sub>1'</sub>), 131.1 (C<sub>7'</sub>), 130.6 (C<sub>2'</sub>), 130.1 (C<sub>12</sub>), 129.5 (C<sub>10</sub>), 129.3 (C<sub>11</sub>), 128.5 (C<sub>8'</sub>), 126.4 (C<sub>3'</sub>), 126.2 (C<sub>2</sub>), 126.2 (C<sub>9'</sub>), 123.7 (C<sub>6'</sub>), 123.4 (C<sub>1</sub>), 121.3 (C<sub>6</sub>), 119.8 (q, <sup>1</sup>*J*<sub>C-F</sub> = 277.5 Hz, C<sub>9</sub>), 111.2 (C<sub>3</sub>), 22.0 (C<sub>14</sub>); <sup>19</sup>FNMR (376 MHz, CDCl<sub>3</sub>) δ<sub>F</sub> -66.6 (s);

Major isomer: **R**<sub>f</sub> (0.28, PE : EtOAc, 19:1); <sup>1</sup>HNMR (500 MHz, CDCl<sub>3</sub>) δ<sub>H</sub> 9.49 (1H, ddd, *J* = 8.8, 1.0, 1.0 Hz, H<sub>9'</sub>), 8.54 (1H, ddd, *J* = 8.6, 1.1, 1.1 Hz, H<sub>4'</sub>), 8.46 (1H, dd, *J* = 7.3, 1.2 Hz, H<sub>2'</sub>), 7.96-7.91 (4H, m, H<sub>6</sub>, H<sub>7'</sub> and H<sub>11</sub>), 7.71 (1H, dd, *J* = 8.6, 7.3 Hz, H<sub>3'</sub>), 7.68 (1H, d, *J* = 8.4 Hz, H<sub>3</sub>), 7.55 (1H, dd, *J* = 8.8, 7.4 Hz, H<sub>8'</sub>), 7.52 (1H, dd, *J* = 8.5, 1.7 Hz, H<sub>2</sub>), 7.40 (2H, m, H<sub>12</sub>), 2.47 (3H, s, H<sub>14</sub>); <sup>13</sup>CNMR (125 MHz, CDCl<sub>3</sub>) δ<sub>C</sub> 163.9 (C<sub>7</sub>), 153.9 (q, <sup>2</sup>*J*<sub>C-F</sub> = 32.9 Hz, C<sub>8</sub>), 152.2 (C<sub>4</sub>), 146.4 (C<sub>13</sub>), 142.7 (C<sub>5</sub>), 132.6 (C<sub>5'</sub>), 132.2 (C<sub>10'</sub>), 132.1 (C<sub>4'</sub>), 131.3 (C<sub>1'</sub>), 131.1 (C<sub>7'</sub>), 130.6 (C<sub>2'</sub>), 130.1 (C<sub>12</sub>), 129.5 (C<sub>10</sub>), 129.3 (C<sub>11</sub>), 128.5 (C<sub>8'</sub>), 126.4 (C<sub>3'</sub>), 126.3 (C<sub>2</sub>), 126.2 (C<sub>9'</sub>), 123.7 (C<sub>6'</sub>), 123.6 (C<sub>1</sub>), 121.6 (C<sub>6</sub>), 119.8 (q, <sup>1</sup>*J*<sub>C-F</sub> = 277.5 Hz, C<sub>9</sub>), 111.5 (C<sub>3</sub>), 22.0 (C<sub>14</sub>); <sup>19</sup>FNMR (376 MHz, CDCl<sub>3</sub>) δ<sub>F</sub> -66.6 (s);

**HRMS** (ES<sup>+</sup>) Calc. for C<sub>26</sub>H<sub>17</sub>F<sub>3</sub><sup>79</sup>BrN<sub>2</sub>O<sub>4</sub>S [M+H]<sup>+</sup> 589.0039, found 589.0035.

**2-(5-Bromonaphthalen-1-yl)-5-(3-(trifluoromethyl)diaziridin-3-yl)benzo[*d*]oxazole **25****

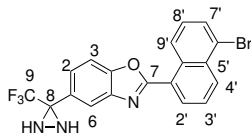

Diaziridine **25** was obtained according to General Procedure E, using tosyl oxime **23** (630 mg, 1.07 mmol) and NH<sub>3</sub> (5 mL) in CH<sub>2</sub>Cl<sub>2</sub> (10 mL). The crude product was used without further purification, yielding diaziridine **25** (469 mg, 1.07 mmol, quant.) as a white solid.

**R**<sub>f</sub> (0.67, PE : EtOAc, 4:1); **v**<sub>max</sub> (cm<sup>-1</sup>) 2981 (C-H), 1457, 1157, 1036; **mp** 149-150 °C; <sup>1</sup>HNMR (500 MHz, CDCl<sub>3</sub>) δ<sub>H</sub> 9.51 (1H, ddd, *J* = 8.5, 1.1, 1.1 Hz, H<sub>9'</sub>), 8.55 (1H, ddd, *J* = 8.6, 1.1, 1.1 Hz, H<sub>4'</sub>), 8.49 (1H, dd, *J* = 7.4, 1.1 Hz, H<sub>2'</sub>), 8.17 (1H, s, H<sub>6</sub>), 7.92 (1H, dd, *J* = 7.4, 1.1 Hz, H<sub>7'</sub>), 7.73 (1H, dd, *J* = 8.6, 7.4 Hz, H<sub>3'</sub>), 7.70 (2H, s, H<sub>2</sub> and H<sub>3</sub>), 7.55 (1H, dd, *J* = 8.5, 7.4 Hz, H<sub>8'</sub>), 2.91 (1H, d, *J* = 8.9 Hz, -NH), 2.34 (1H, d, *J* = 8.9 Hz, -NH); <sup>13</sup>CNMR (125 MHz, CDCl<sub>3</sub>) δ<sub>C</sub> 163.5 (C<sub>7</sub>), 151.0 (C<sub>4</sub>), 142.5 (C<sub>5</sub>), 132.5 (C<sub>5'</sub>), 132.0 (C<sub>10'</sub>), 131.9 (C<sub>4'</sub>), 130.9 (C<sub>7'</sub>), 130.3 (C<sub>2'</sub>), 129.7 (C<sub>1</sub>), 128.3 (C<sub>8'</sub>), 127.2 (C<sub>1'</sub>), 126.3 (C<sub>3'</sub> or C<sub>9'</sub>), 126.2 (C<sub>3'</sub> or C<sub>9'</sub>), 125.6 (C<sub>2</sub>), 124.5 (q, <sup>1</sup>*J*<sub>C-F</sub> = 276.6 Hz, C<sub>9</sub>),

123.6 (C<sub>6'</sub>), 120.8 (C<sub>6</sub>), 110.9 (C<sub>3</sub>), 58.3 (q, <sup>2</sup>J<sub>C-F</sub> = 36.1 Hz, C<sub>8</sub>); <sup>19</sup>FNMR (376 MHz, CDCl<sub>3</sub>) δ<sub>F</sub> -75.5 (s); HRMS (ES<sup>+</sup>) Calc. for C<sub>19</sub>H<sub>12</sub><sup>79</sup>BrF<sub>3</sub>N<sub>3</sub>O [M+H]<sup>+</sup> 434.0105, found 434.0110.

## 2-(5-Bromonaphthalen-1-yl)-5-(3-(trifluoromethyl)-3H-diazirin-3-yl)benzo[d]oxazole **26**

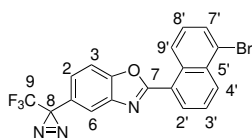

Diazirine **26** was obtained according to General Procedure F, using diaziridine **25** (439 mg, 1.01 mmol), iodine (308 mg, 1.21 mmol) and NEt<sub>3</sub> (0.42 mL, 3.03 mmol) in CH<sub>2</sub>Cl<sub>2</sub> (20 mL). The crude product was purified by flash column chromatography (PE : EtOAc, 49:1 → 19:1) to yield diazirine **26** (407 mg, 0.945 mmol, 94%) as a white solid.

**R<sub>f</sub>** (0.53, PE : EtOAc, 49:1); **v<sub>max</sub>** (cm<sup>-1</sup>) 2981 (C-H), 1258 (C-F), 1154, 773; **mp** 104-106 °C; <sup>1</sup>HNMR (500 MHz, CDCl<sub>3</sub>) δ<sub>H</sub> 9.50 (1H, ddd, *J* = 8.7, 1.1, 1.1 Hz, H<sub>9'</sub>), 8.54 (1H, ddd, *J* = 8.6, 1.1, 1.1 Hz, H<sub>4'</sub>), 8.47 (1H, dd, *J* = 7.3, 1.1 Hz, H<sub>2'</sub>), 7.92 (1H, dd, *J* = 7.4, 1.0 Hz, H<sub>7'</sub>), 7.83 (1H, dd, *J* = 1.8, 0.6 Hz, H<sub>6</sub>), 7.72 (1H, dd, *J* = 8.6, 7.3 Hz, H<sub>3'</sub>), 7.66 (1H, d, *J* = 8.6, 0.6 Hz, H<sub>3</sub>), 7.54 (1H, dd, *J* = 8.7, 7.4 Hz, H<sub>8'</sub>), 7.24 (1H, dd, *J* = 8.6, 1.8 Hz, H<sub>2</sub>); <sup>13</sup>CNMR (125 MHz, CDCl<sub>3</sub>) δ<sub>C</sub> 163.6 (C<sub>7</sub>), 150.7 (C<sub>4</sub>), 142.8 (C<sub>5</sub>), 132.4 (C<sub>5'</sub>), 132.1 (C<sub>10'</sub>), 132.0 (C<sub>4'</sub>), 131.0 (C<sub>7'</sub>), 130.4 (C<sub>2'</sub>), 128.3 (C<sub>8'</sub>), 126.3 (C<sub>3'</sub>), 126.1 (C<sub>9'</sub>), 125.6 (C<sub>1</sub>), 124.0 (C<sub>2</sub>), 123.6 (C<sub>1'</sub> or C<sub>6'</sub>), 123.4 (C<sub>1'</sub> or C<sub>6'</sub>), 122.3 (q, <sup>1</sup>J<sub>C-F</sub> = 274.7 Hz, C<sub>9</sub>), 119.5 (C<sub>6</sub>), 111.2 (C<sub>3</sub>), 28.8 (q, <sup>2</sup>J<sub>C-F</sub> = 40.6 Hz, C<sub>8</sub>); <sup>19</sup>FNMR (376 MHz, CDCl<sub>3</sub>) δ<sub>F</sub> -65.4 (s); HRMS (ES<sup>+</sup>) Calc. for C<sub>19</sub>H<sub>10</sub><sup>79</sup>BrF<sub>3</sub>N<sub>3</sub>O [M+H]<sup>+</sup> 431.9954, found 431.9950.

## 2-(5-Ethynynaphthalen-1-yl)-5-(3-(trifluoromethyl)-3H-diazirin-3-yl)benzo[d]oxazole **4**

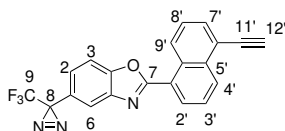

Diazirine **4** was obtained according to General Procedure G, using diazirine **26** (200 mg, 0.465 mmol), bis(triphenylphosphine)palladium(II) dichloride (48.9 mg, 69.7 μmol), copper(I) iodide (8.86 mg, 46.5 μmol), NEt<sub>3</sub> (1.50 mL) and trimethylsilylacetylene (78.2 μL, 0.558 mmol) in THF (10 mL). The reaction was worked up after 6 h, although starting material was still present. The TMS-protected alkyne intermediate formed was purified by flash column chromatography (PE : EtOAc, 1:0 → 99:1), then deprotected with TBAF (0.93 mL, 1 M in THF) in THF (5 mL). The reaction was complete after 30 min. The crude product was purified by flash column chromatography (pentane : toluene, 19:1) to yield alkyne **4** (58.9 mg, 0.156 mmol, 34%) as an off-white solid.

**R<sub>f</sub>** (0.16, pentane : toluene, 19:1); **v<sub>max</sub>** (cm<sup>-1</sup>) 2981 (C-H), 1256 (C-F), 1154, 773; **mp** 87-89 °C; <sup>1</sup>HNMR (500 MHz, CDCl<sub>3</sub>) δ<sub>H</sub> 9.52 (1H, ddd, *J* = 8.6, 1.0, 1.0 Hz, H<sub>9'</sub>), 8.64 (1H, ddd, *J* = 8.4, 1.1, 1.1 Hz, H<sub>4'</sub>), 8.46 (1H, dd, *J* = 7.3, 1.3 Hz, H<sub>2'</sub>), 7.85 (1H, dd, *J* = 7.1, 1.2 Hz, H<sub>7'</sub>), 7.82 (1H, d, *J* = 1.7 Hz, H<sub>6</sub>), 7.70 (1H, dd, *J* = 8.4, 7.3 Hz, H<sub>3'</sub>), 7.65 (1H, dd, *J* = 8.7, 7.1 Hz, H<sub>8'</sub>), 7.64 (1H, d, *J* = 8.7 Hz, H<sub>3</sub>), 7.24 (1H, dd, *J* = 8.4, 1.9 Hz, H<sub>2</sub>), 3.53 (1H, s, H<sub>12'</sub>); <sup>13</sup>CNMR (125 MHz, CDCl<sub>3</sub>) δ<sub>C</sub> 163.9 (C<sub>7</sub>), 150.7 (C<sub>4</sub>), 142.8 (C<sub>5</sub>), 134.0 (C<sub>5'</sub>), 131.9 (C<sub>7'</sub>), 130.9 (C<sub>4'</sub>), 130.5 (C<sub>2'</sub>), 130.2 (C<sub>10'</sub>), 127.4 (C<sub>9'</sub>), 127.3 (C<sub>8'</sub>), 125.9 (C<sub>3'</sub>), 125.6 (C<sub>1</sub>), 123.9 (C<sub>2</sub>), 123.2 (C<sub>1'</sub>), 122.3 (q, <sup>1</sup>J<sub>C-F</sub> = 274.7 Hz, C<sub>9</sub>), 120.6 (C<sub>6'</sub>), 119.4 (C<sub>6</sub>), 111.1 (C<sub>3</sub>), 82.7 (C<sub>12'</sub>), 81.5 (C<sub>11'</sub>), 28.8 (q, <sup>2</sup>J<sub>C-F</sub> = 40.6 Hz, C<sub>8</sub>); <sup>19</sup>FNMR (376 MHz, CD<sub>3</sub>OD) δ<sub>F</sub> -65.4 (s); HRMS (CI<sup>+</sup>) Calc. for C<sub>21</sub>H<sub>10</sub>F<sub>3</sub>N<sub>3</sub>O [M<sup>+</sup>] 377.0770 found 377.0778.

## 5-bromo-2-(4-fluorophenyl)benzo[d]oxazole **27**

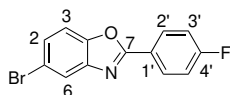

4-fluorobenzoyl chloride (18.6 g, 0.12 mol) was added to a suspension of 2-amino-4-bromophenol (20.0 g, 0.11 mol) in xylenes (100 mL) and refluxed for 1 h. Then methanesulfonic acid (2.0 g, 0.02 mol) was added and the mixture was refluxed for a further 1 h. The reaction was cooled to RT, diluted with EtOAc (500 mL) and washed with water, sat. aq. NaHCO<sub>3</sub> and brine. The combined organic layers were dried over Na<sub>2</sub>SO<sub>4</sub>, filtered and concentrated *in vacuo*. The residue was recrystallized from petroleum ether/EtOAc (2:1) and filtered to afford the title compound (20.0 g, 90%).

**mp** 149-151 °C; **<sup>1</sup>H NMR** (500 MHz, CDCl<sub>3</sub>) δ 8.27 - 8.21 (2H, m, H<sub>2'</sub>), 7.89 (1H, d, *J* = 1.6 Hz, H<sub>6</sub>), 7.47 (1H, dd, *J* = 8.6, 1.7 Hz, H<sub>2</sub>), 7.45 (1H, d, *J* = 8.5 Hz, H<sub>3</sub>), 7.25 - 7.20 (2H, m, H<sub>3'</sub>); **<sup>13</sup>C NMR** (125 MHz, CDCl<sub>3</sub>) δ 165.20 (d, <sup>1</sup>*J*<sub>C-F</sub> = 253.6 Hz, C<sub>4'</sub>), 163.4 (C<sub>7</sub>), 149.9 (C<sub>4</sub>), 143.9 (C<sub>5</sub>), 130.2 (d, <sup>3</sup>*J*<sub>C-F</sub> = 9.0 Hz, C<sub>2'</sub>), 128.3 (C<sub>2</sub>), 123.2 (C<sub>1'</sub>), 123.1 (C<sub>6</sub>), 117.5 (C<sub>1</sub>), 116.5 (d, <sup>2</sup>*J*<sub>C-F</sub> = 22.2 Hz, C<sub>3'</sub>), 111.9 (C<sub>3</sub>); **<sup>19</sup>F NMR** (376 MHz, CDCl<sub>3</sub>) xx; **HRMS** (ES<sup>+</sup>) Calc. for C<sub>13</sub>H<sub>8</sub><sup>79</sup>BrFNO [M + H]<sup>+</sup> 291.9768, found 291.9769.

### methyl ethyl(2-(4-fluorophenyl)benzo[*d*]oxazol-5-yl)phosphinate (SMT021256) 8

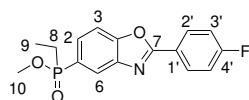

To a degassed solution of 5-bromo-2-(4-fluorophenyl)benzo[*d*]oxazole (20.0 g, 0.07 mol), ethylphosphinic acid (14.8 g, 0.14 mol) and DIPEA (25 mL, 0.14 mol) in DME (100 mL) and toluene (300 mL) Pd(OAc)<sub>2</sub> (0.92 g, 0.004 mol) and XantPhos (2.27 g, 0.004 mol) were added under N<sub>2</sub> and the reaction was stirred at 90°C for 2 h. The solvents were removed *in vacuo* and the residue partitioned between EtOAc and NaOH (1M). The aqueous layer was extracted into EtOAc, acidified with 1M HCl (pH 3) and extracted with EtOAc. The combined organic layers were washed with brine, dried over Na<sub>2</sub>SO<sub>4</sub>, and the desired product was obtained by column chromatography (5% MeOH/DCM) as an off-white solid (18.9 g, 86%).

**mp** 90-2 °C; **<sup>1</sup>H NMR** (500 MHz, (CD<sub>3</sub>)<sub>2</sub>SO) δ 8.32 - 8.25 (2H, m, H<sub>2'</sub>), 8.16 - 8.10 (1H, m, H<sub>6</sub>), 7.97 (1H, dd, *J* = 8.3, 2.3 Hz, H<sub>3</sub>), 7.79 (1H, ddd, *J* = 10.8, 8.3, 1.4 Hz, H<sub>2</sub>), 7.53 - 7.44 (2H, m, H<sub>3'</sub>), 3.53 (3H, d, *J* = 10.9 Hz, H<sub>10</sub>), 2.09 - 1.91 (2H, m, H<sub>8</sub>), 0.97 (3H, dt, *J* = 18.9, 7.6 Hz, H<sub>9</sub>); **<sup>13</sup>C NMR** (125 MHz, (CD<sub>3</sub>)<sub>2</sub>SO) δ 164.5 (d, <sup>1</sup>*J*<sub>C-F</sub> = 250.8 Hz, C<sub>4'</sub>), 162.7 (C<sub>7</sub>), 152.7 (d, <sup>4</sup>*J*<sub>C-P</sub> = 3.4 Hz, C<sub>4</sub>), 141.8 (d, <sup>3</sup>*J*<sub>C-P</sub> = 16.4 Hz, C<sub>5</sub>), 130.3 (d, <sup>3</sup>*J*<sub>C-F</sub> = 9.4 Hz, C<sub>2'</sub>), 128.9 (d, <sup>2</sup>*J*<sub>C-P</sub> = 11.3 Hz, C<sub>2</sub>), 126.9 (d, <sup>1</sup>*J*<sub>C-P</sub> = 121.1 Hz, C<sub>1</sub>), 123.4 (d, <sup>4</sup>*J*<sub>C-F</sub> = 11.1 Hz, C<sub>1'</sub>), 122.7 (d, <sup>2</sup>*J*<sub>C-P</sub> = 3.4 Hz, C<sub>6</sub>), 116.7 (d, <sup>2</sup>*J*<sub>C-F</sub> = 22.1 Hz, C<sub>3'</sub>), 111.7 (d, <sup>3</sup>*J*<sub>C-P</sub> = 13.5 Hz, C<sub>3</sub>), 50.8 (d, <sup>2</sup>*J*<sub>C-P</sub> = 6.6 Hz, C<sub>10</sub>), 21.2 (d, <sup>1</sup>*J*<sub>C-P</sub> = 101.3 Hz, C<sub>8</sub>), 5.8 (d, <sup>2</sup>*J*<sub>C-P</sub> = 4.7 Hz, C<sub>9</sub>); **<sup>31</sup>P NMR {H}** (162 MHz, (CD<sub>3</sub>)<sub>2</sub>SO) δ 46.8 (s); **<sup>19</sup>F NMR** (376 MHz, (CD<sub>3</sub>)<sub>2</sub>SO) δ -106.8 (m); **LC-MS** (254 nm, 100%) R<sub>T</sub> 2.34 min, MS (ES<sup>+</sup>) Calc. for C<sub>16</sub>H<sub>15</sub>FNO<sub>3</sub>P [M + H]<sup>+</sup> 320.1, found 320.1; **HRMS** (ES<sup>+</sup>) Calc. for C<sub>16</sub>H<sub>15</sub>FNO<sub>3</sub>P [M + H]<sup>+</sup> 320.0846, found 320.0843.

The two enantiomers were isolated by chiral separation. SMT021256 was dissolved in MeOH (100 mg/mL) and then purified by supercritical flash chromatography with a Lux C4 column (21.2 mm x 250 mm, 5 μm) and isocratic MeOH/CO<sub>2</sub> (35:65). From 10076.2 mg racemic mixture, 3647.3 mg of the first eluting enantiomer (R<sub>T</sub> 1.85 min, 49.8%) were collected and assigned the name SMT022331 and 4962.1 mg of the second enantiomer (R<sub>T</sub> 3.15 min, 50.2%) were collected and assigned the name SMT022332.

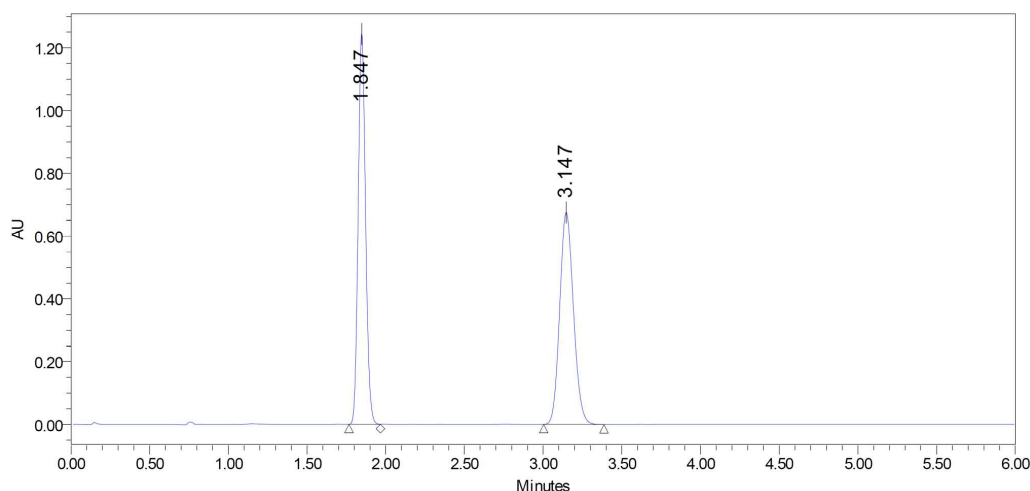

**methyl (-)-ethyl(2-(4-fluorophenyl)benzo[d]oxazol-5-yl)phosphinate (SMT022331) 28**

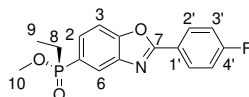

**mp** 88 °C. **<sup>1</sup>H NMR** (500 MHz, (CD<sub>3</sub>)<sub>2</sub>SO) δ 8.32 - 8.25 (2H, m, H<sub>2'</sub>), 8.16 - 8.10 (1H, m, H<sub>6</sub>), 7.97 (1H, dd, *J* = 8.3, 2.3 Hz, H<sub>3</sub>), 7.79 (1H, ddd, *J* = 10.8, 8.3, 1.4 Hz, H<sub>2</sub>), 7.53 - 7.44 (2H, m, H<sub>3'</sub>), 3.53 (3H, d, *J* = 10.9 Hz, H<sub>10</sub>), 2.09 - 1.91 (2H, m, H<sub>8</sub>), 0.97 (3H, dt, *J* = 18.9, 7.6 Hz, H<sub>9</sub>); **<sup>13</sup>C NMR** (125 MHz, (CD<sub>3</sub>)<sub>2</sub>SO) δ 164.5 (d, <sup>1</sup>*J*<sub>C-F</sub> = 250.8 Hz, C<sub>4'</sub>), 162.7 (C<sub>7</sub>), 152.7 (d, <sup>4</sup>*J*<sub>C-P</sub> = 3.4 Hz, C<sub>4</sub>), 141.8 (d, <sup>3</sup>*J*<sub>C-P</sub> = 17.2 Hz, C<sub>5</sub>), 130.3 (d, <sup>3</sup>*J*<sub>C-F</sub> = 9.7 Hz, C<sub>2'</sub>), 128.9 (d, <sup>2</sup>*J*<sub>C-P</sub> = 11.2 Hz, C<sub>2</sub>), 126.9 (d, <sup>1</sup>*J*<sub>C-P</sub> = 120.9 Hz, C<sub>1</sub>), 123.4 (d, <sup>4</sup>*J*<sub>C-F</sub> = 11.0 Hz, C<sub>1'</sub>), 122.7 (d, <sup>2</sup>*J*<sub>C-P</sub> = 3.1 Hz, C<sub>6</sub>), 116.7 (d, <sup>2</sup>*J*<sub>C-F</sub> = 22.1 Hz, C<sub>3'</sub>), 111.7 (d, <sup>3</sup>*J*<sub>C-P</sub> = 13.7 Hz, C<sub>3</sub>), 50.8 (d, <sup>2</sup>*J*<sub>C-P</sub> = 6.5 Hz, C<sub>10</sub>), 21.2 (d, <sup>1</sup>*J*<sub>C-P</sub> = 101.7 Hz, C<sub>8</sub>), 5.8 (d, <sup>2</sup>*J*<sub>C-P</sub> = 4.6 Hz, C<sub>9</sub>); **<sup>31</sup>P NMR {H}** (162 MHz, (CD<sub>3</sub>)<sub>2</sub>SO) δ 46.8. **<sup>19</sup>F NMR** (376 MHz, (CD<sub>3</sub>)<sub>2</sub>SO) δ -106.7 (m); **HRMS** (ES<sup>+</sup>) Calc. for C<sub>16</sub>H<sub>15</sub>FNO<sub>3</sub>P [M + H]<sup>+</sup> 320.0846, found 320.0845; [α<sub>D</sub><sup>25</sup>] - 40.7[c1.00, THF].

**methyl (+)-ethyl(2-(4-fluorophenyl)benzo[d]oxazol-5-yl)phosphinate (SMT022332) 7**

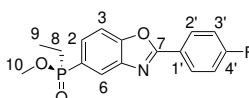

**mp** 86-7 °C; **<sup>1</sup>H NMR** (500 MHz, (CD<sub>3</sub>)<sub>2</sub>SO) δ 8.31 - 8.25 (2H, m, H<sub>2'</sub>), 8.13 (1H, dd, *J* = 11.6, 1.4 Hz, H<sub>6</sub>), 7.97 (1H, dd, *J* = 8.3, 2.3 Hz, H<sub>3</sub>), 7.79 (1H, ddd, *J* = 10.8, 8.3, 1.4 Hz, H<sub>2</sub>), 7.53 - 7.44 (2H, m, H<sub>3'</sub>), 3.53 (3H, d, *J* = 10.9 Hz, H<sub>10</sub>), 2.09 - 1.91 (2H, m, H<sub>8</sub>), 0.97 (3H, dt, *J* = 18.9, 7.6 Hz, H<sub>9</sub>); **<sup>13</sup>C NMR** (125 MHz, (CD<sub>3</sub>)<sub>2</sub>SO) δ 164.5 (d, <sup>1</sup>*J*<sub>C-F</sub> = 251.5 Hz, C<sub>4'</sub>), 162.7 (C<sub>7</sub>), 152.7 (d, <sup>4</sup>*J*<sub>C-P</sub> = 3.4 Hz, C<sub>4</sub>), 141.8 (d, <sup>3</sup>*J*<sub>C-P</sub> = 17.0 Hz, C<sub>5</sub>), 130.3 (d, <sup>3</sup>*J*<sub>C-F</sub> = 9.3 Hz, C<sub>2'</sub>), 128.9 (d, <sup>2</sup>*J*<sub>C-P</sub> = 11.0 Hz, C<sub>2</sub>), 126.9 (d, <sup>1</sup>*J*<sub>C-P</sub> = 121.6 Hz, C<sub>1</sub>), 123.4 (d, <sup>4</sup>*J*<sub>C-F</sub> = 11.0 Hz, C<sub>1'</sub>), 122.7 (d, <sup>2</sup>*J*<sub>C-P</sub> = 3.3 Hz, C<sub>6</sub>), 116.7 (d, <sup>2</sup>*J*<sub>C-F</sub> = 22.0 Hz, C<sub>3'</sub>), 111.7 (d, <sup>3</sup>*J*<sub>C-P</sub> = 13.6 Hz, C<sub>3</sub>), 50.8 (d, <sup>2</sup>*J*<sub>C-P</sub> = 6.4 Hz, C<sub>10</sub>), 21.2 (d, <sup>1</sup>*J*<sub>C-P</sub> = 101.6 Hz, C<sub>8</sub>), 5.8 (d, <sup>2</sup>*J*<sub>C-P</sub> = 4.6 Hz, C<sub>9</sub>); **<sup>31</sup>P NMR {H}** (162 MHz, (CD<sub>3</sub>)<sub>2</sub>SO) δ 46.8; **<sup>19</sup>F NMR** (376 MHz, (CD<sub>3</sub>)<sub>2</sub>SO) δ -106.8 (m); **HRMS** (ES<sup>+</sup>) Calc. for C<sub>16</sub>H<sub>15</sub>FNO<sub>3</sub>P [M + H]<sup>+</sup> 320.0846, found 320.0846; [α<sub>D</sub><sup>25</sup>] + 40.7[c1.00, THF].

## Chemical and chiral purity of SMT022331 and SMT022332

### Chemical purity analysis conditions

|                     |                                            |    |     |
|---------------------|--------------------------------------------|----|-----|
| Column Details      | XSelect CSH C18 (50 x 2.1 mm, 1.7 $\mu$ m) |    |     |
| Column Temperature  | 40 °C                                      |    |     |
| Flow Rate           | 0.6 mL/minute                              |    |     |
| Detector Wavelength | 240 nm                                     |    |     |
| Injection Volume    | 1.0 $\mu$ L                                |    |     |
| Mobile Phase A      | Water (0.1% v/v TFA)                       |    |     |
| Mobile Phase B      | MeCN (0.1% v/v TFA)                        |    |     |
| Gradient Profile    | Time (min)                                 | %A | %B  |
|                     | 0                                          | 97 | 3   |
|                     | 4                                          | 3  | 97  |
|                     | 4.02                                       | 0  | 100 |
|                     | 4.5                                        | 0  | 100 |
|                     | 4.52                                       | 97 | 3   |
|                     | 6                                          | 97 | 3   |

### Chiral purity analysis conditions

|                      |                                     |
|----------------------|-------------------------------------|
| Column Details       | Lux C4 (4.6 mm x 250 mm, 5 $\mu$ m) |
| Column Temperature   | 40 °C                               |
| Flow Rate            | 4 mL/minute                         |
| Detector Wavelength  | 210-240 nm                          |
| Injection Volume     | 1.0 $\mu$ L                         |
| Isocratic conditions | 36:65 MeOH/CO <sub>2</sub>          |

### **methyl (-)-ethyl(2-(4-fluorophenyl)benzo[d]oxazol-5-yl)phosphinate (SMT022331)** Chemical purity (100%)

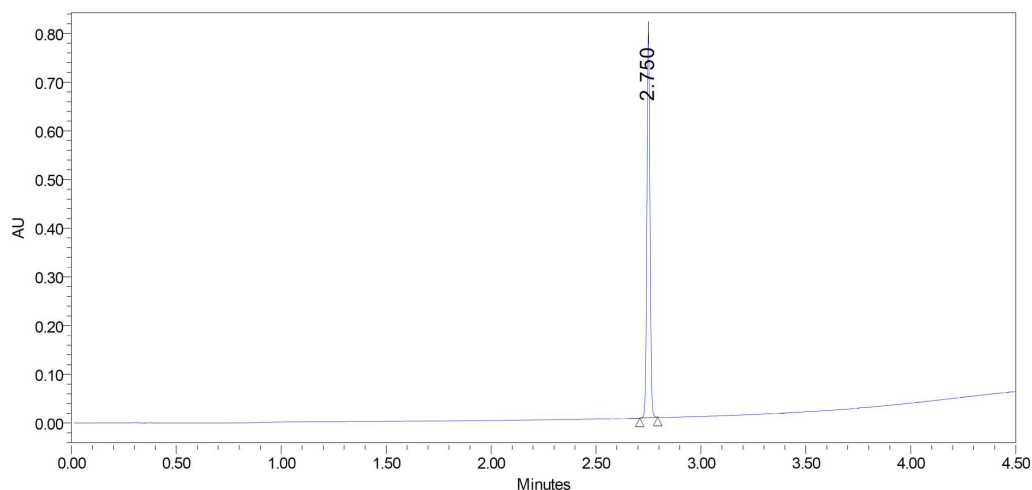

### Chiral purity (100%)

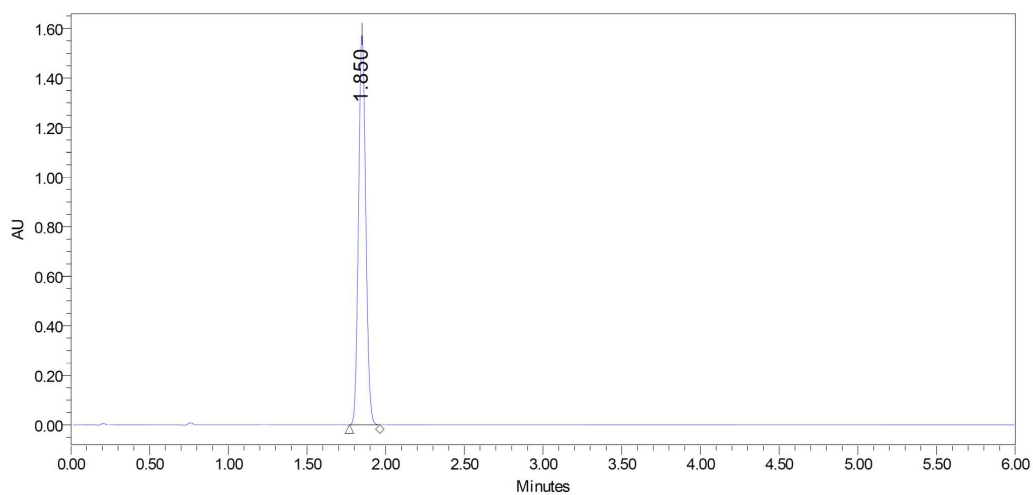

**methyl (+)-ethyl(2-(4-fluorophenyl)benzo[d]oxazol-5-yl)phosphinate (SMT022332)**  
Chemical purity (99.7%)

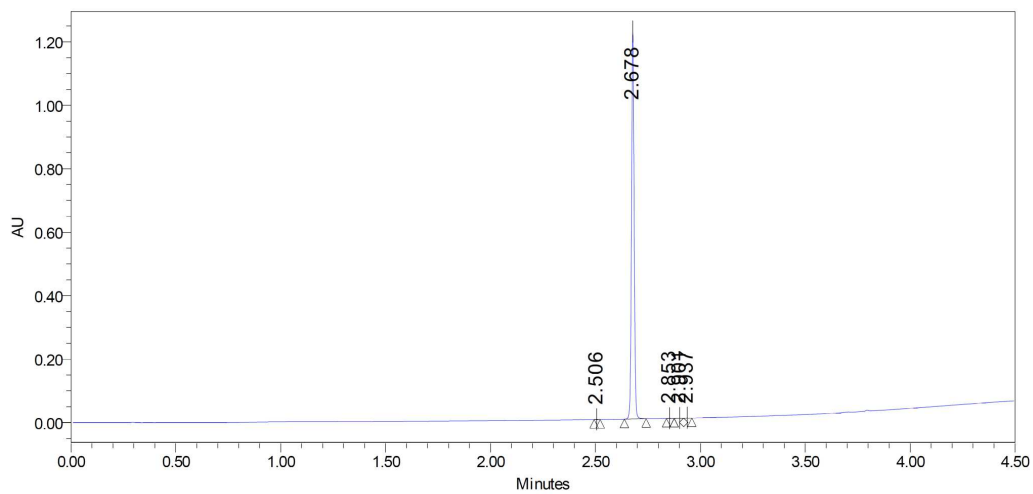

Chiral purity (99.9%)

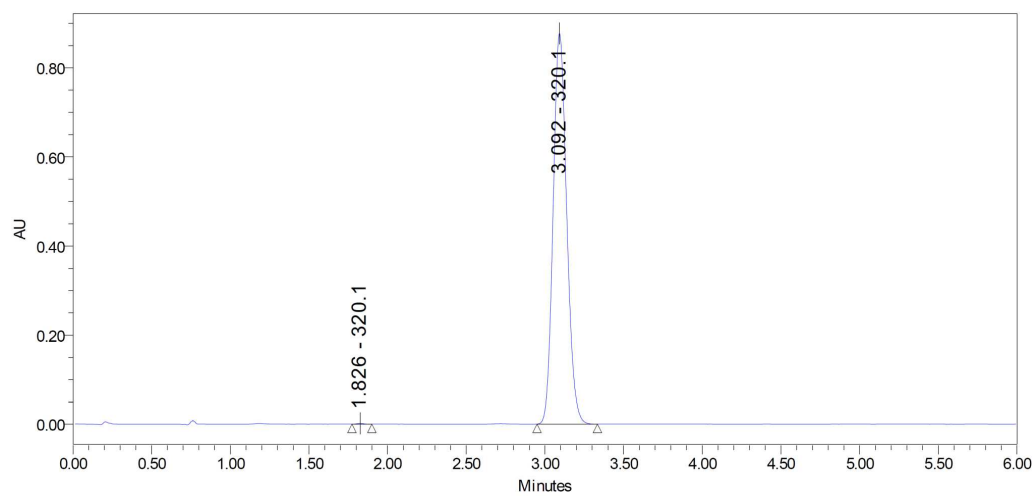

# Spectra:

## 2-(4-ethynylphenyl)-5-(3-(trifluoromethyl)-3H-diazirin-3-yl)benzo[d]oxazole 3

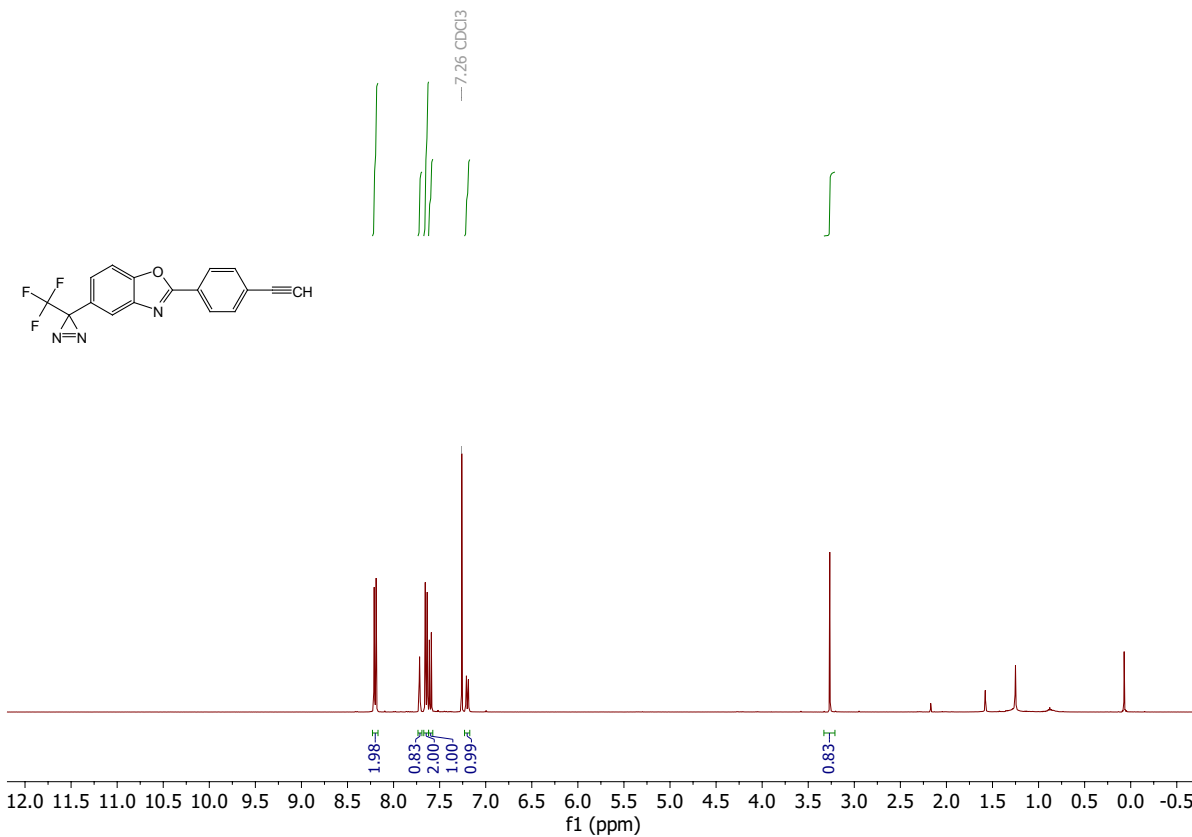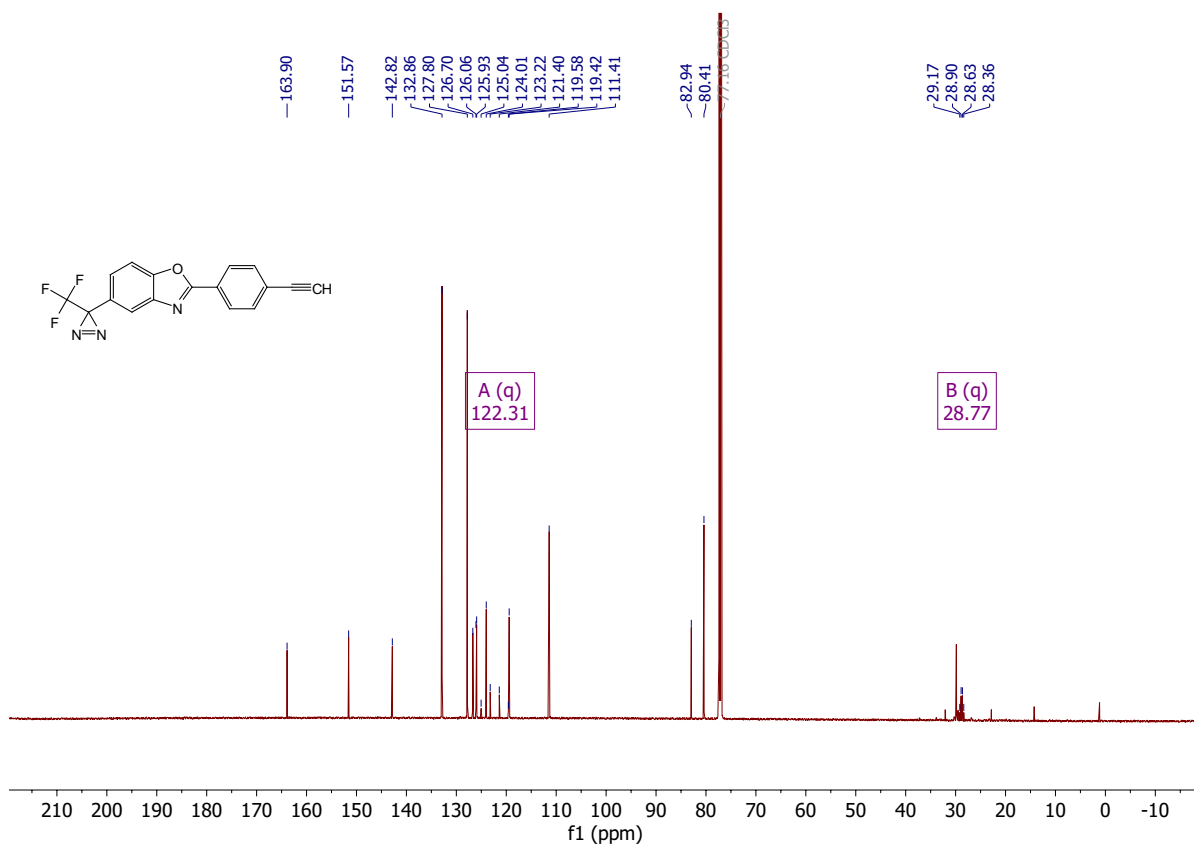

-67.35

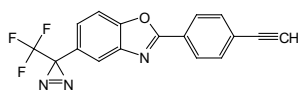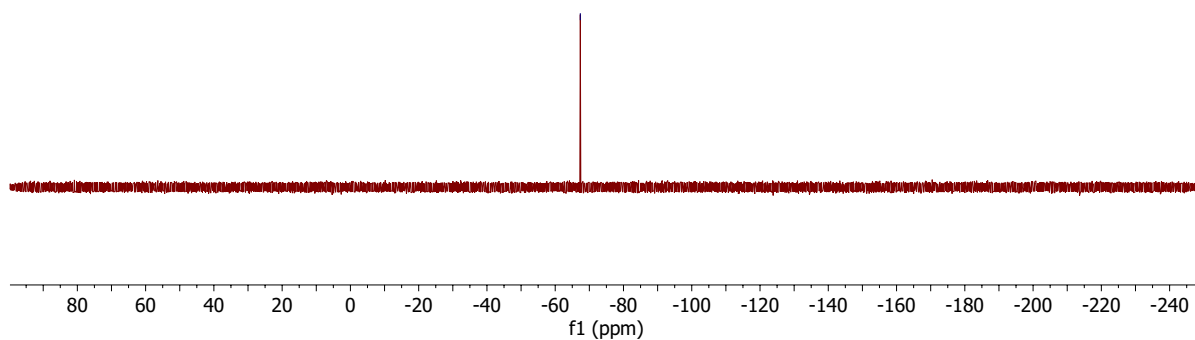

2-(3-ethynylphenyl)-5-(3-(trifluoromethyl)-3H-diazirin-3-yl)benzo[d]oxazole 2

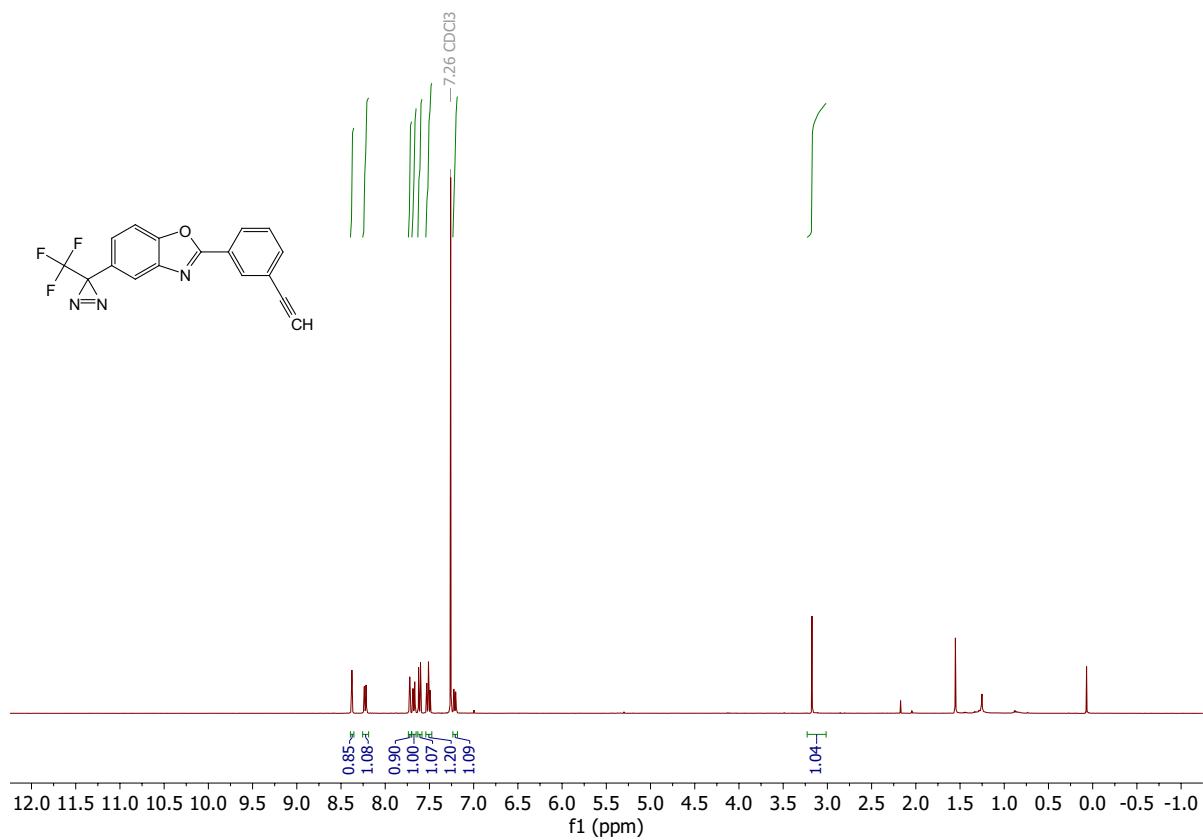



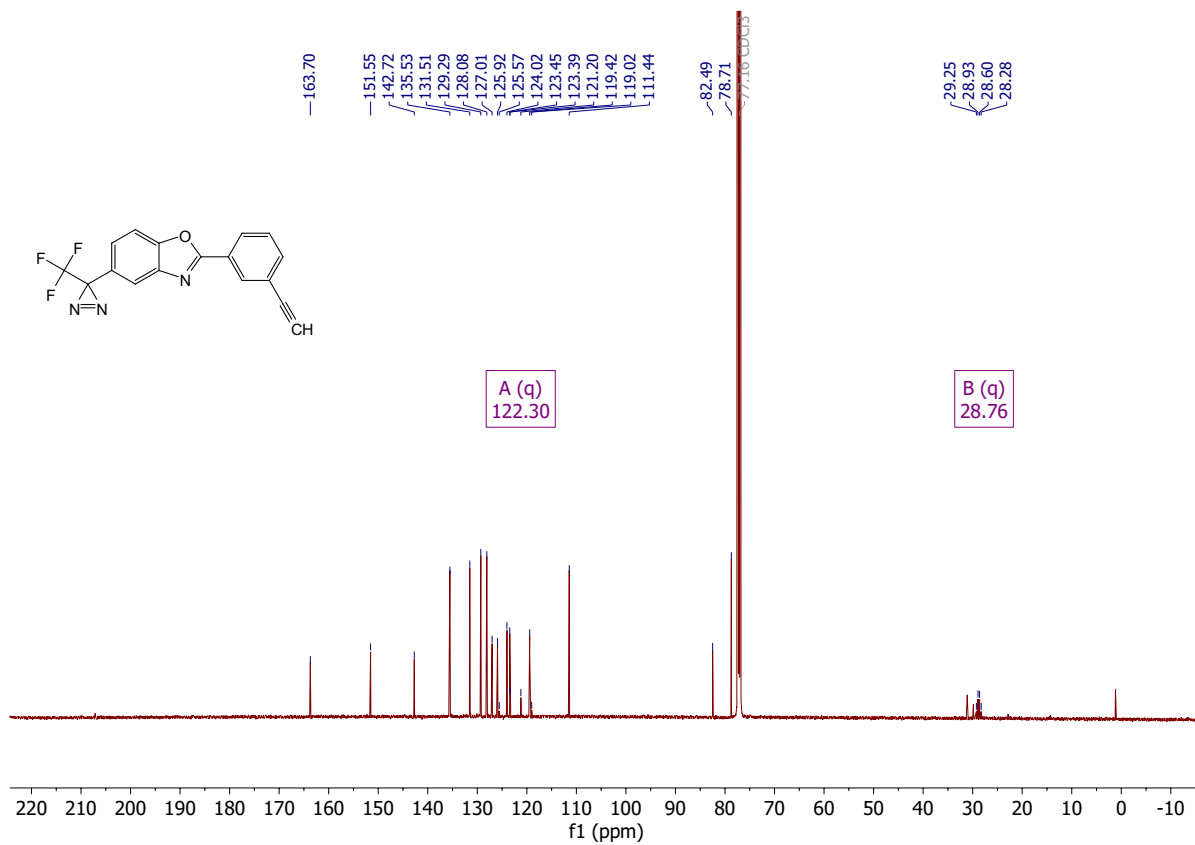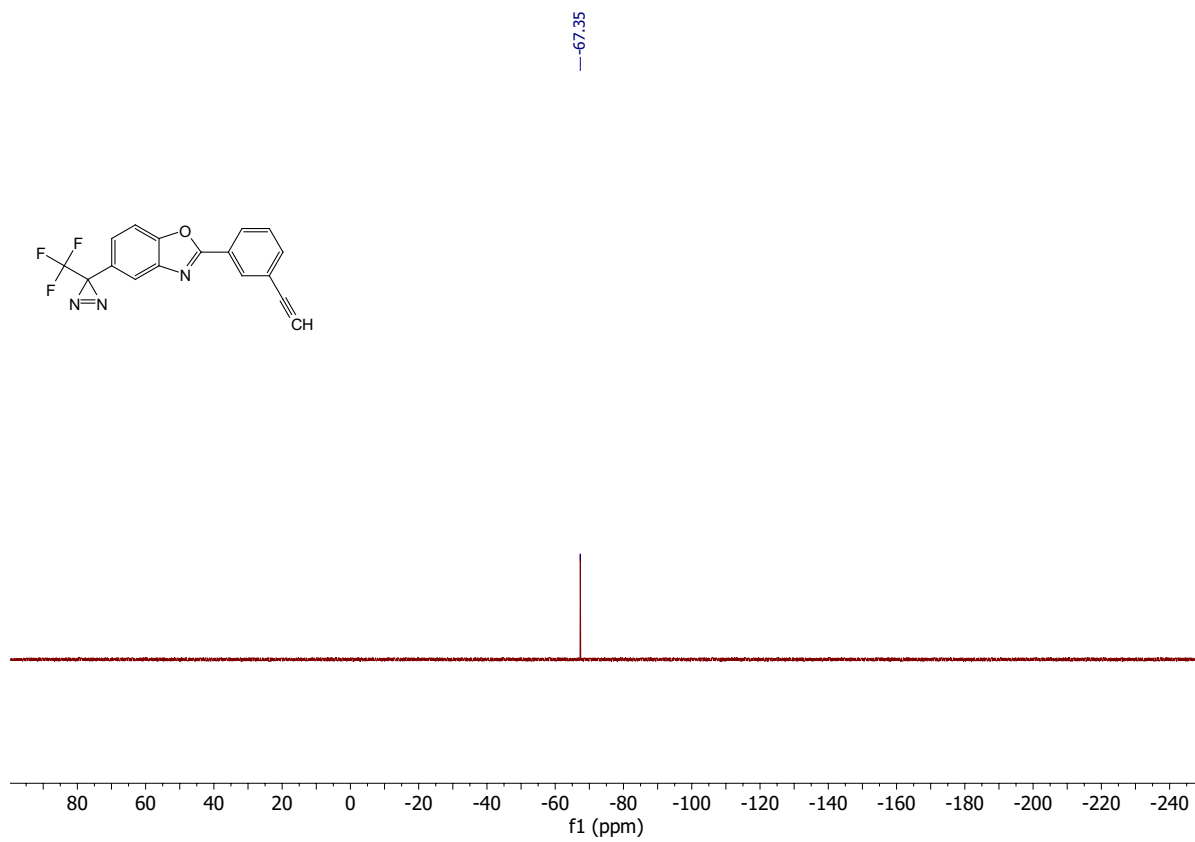

2-(5-ethynyl-naphthalen-1-yl)-5-(3-(trifluoromethyl)-3H-diazirin-3-yl)benzo[d]oxazole 4

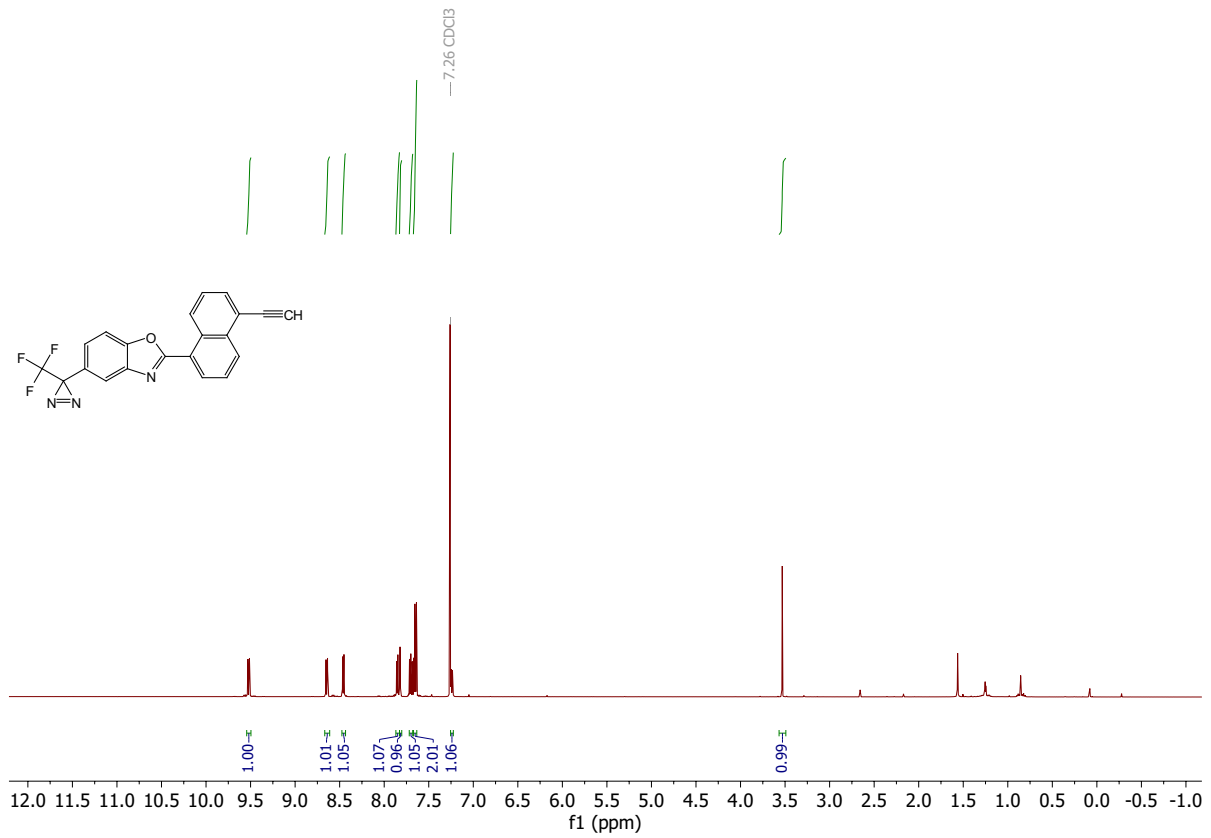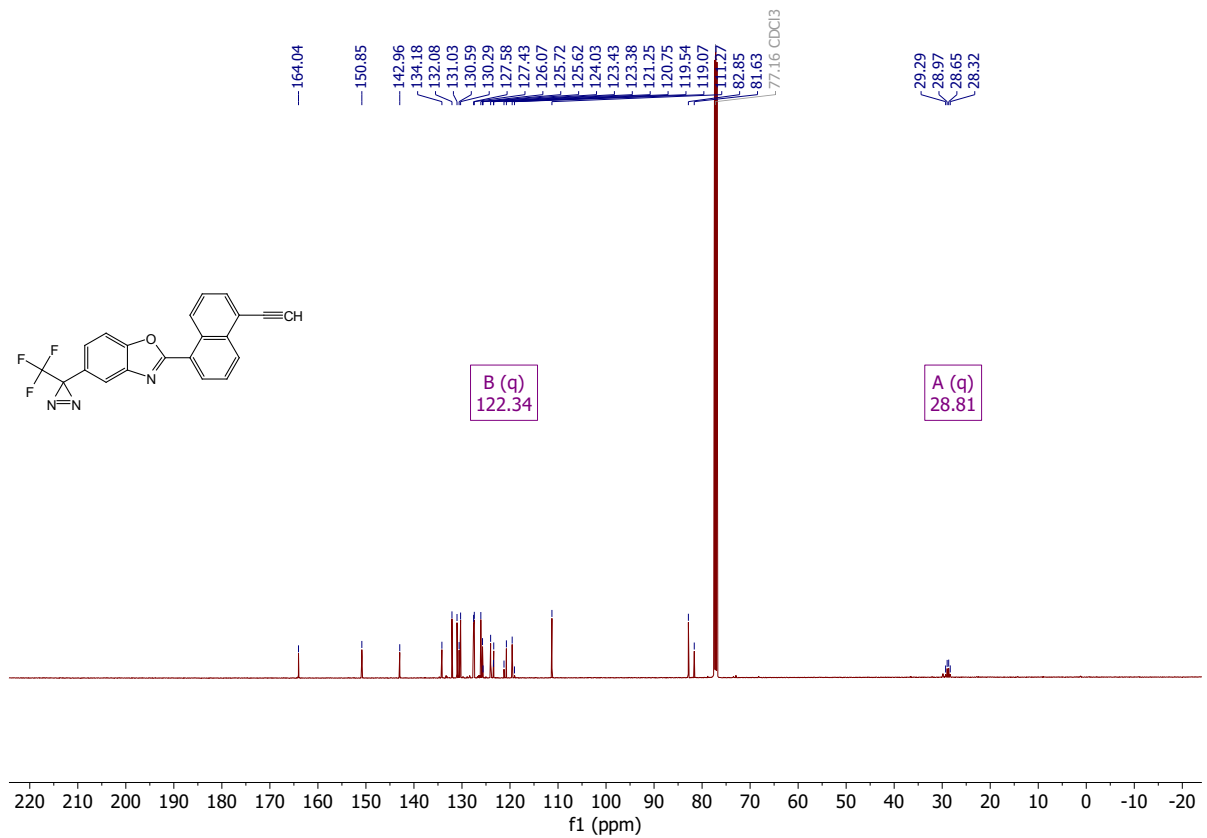

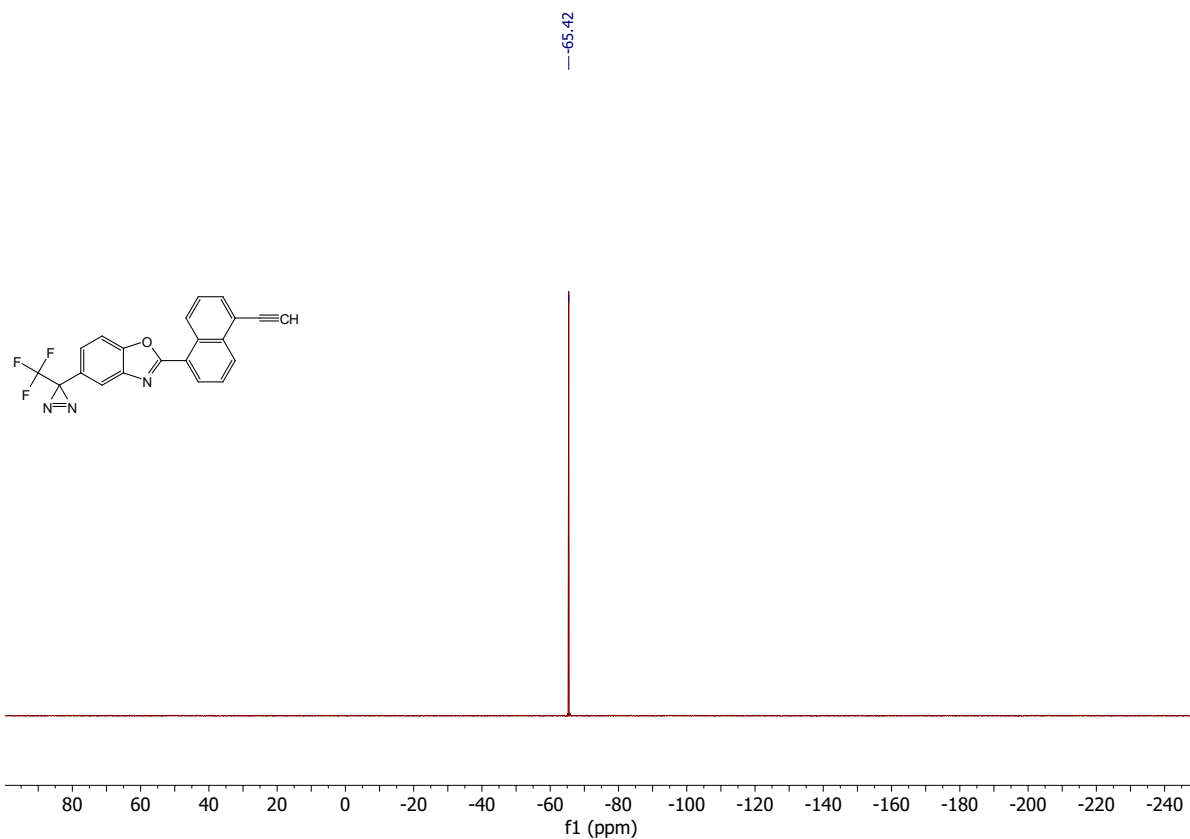

**methyl (+)-ethyl(2-(4-fluorophenyl)benzo[d]oxazol-5-yl)phosphinate 7**

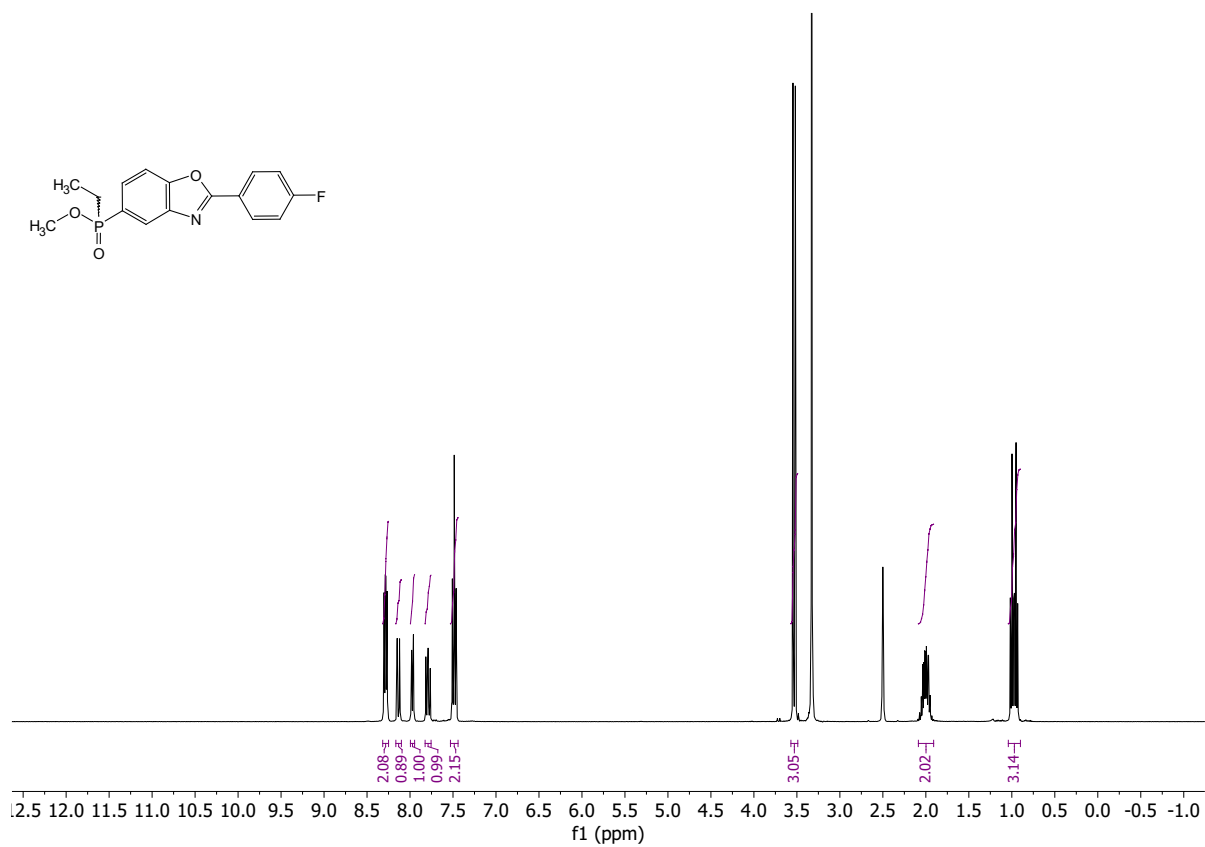

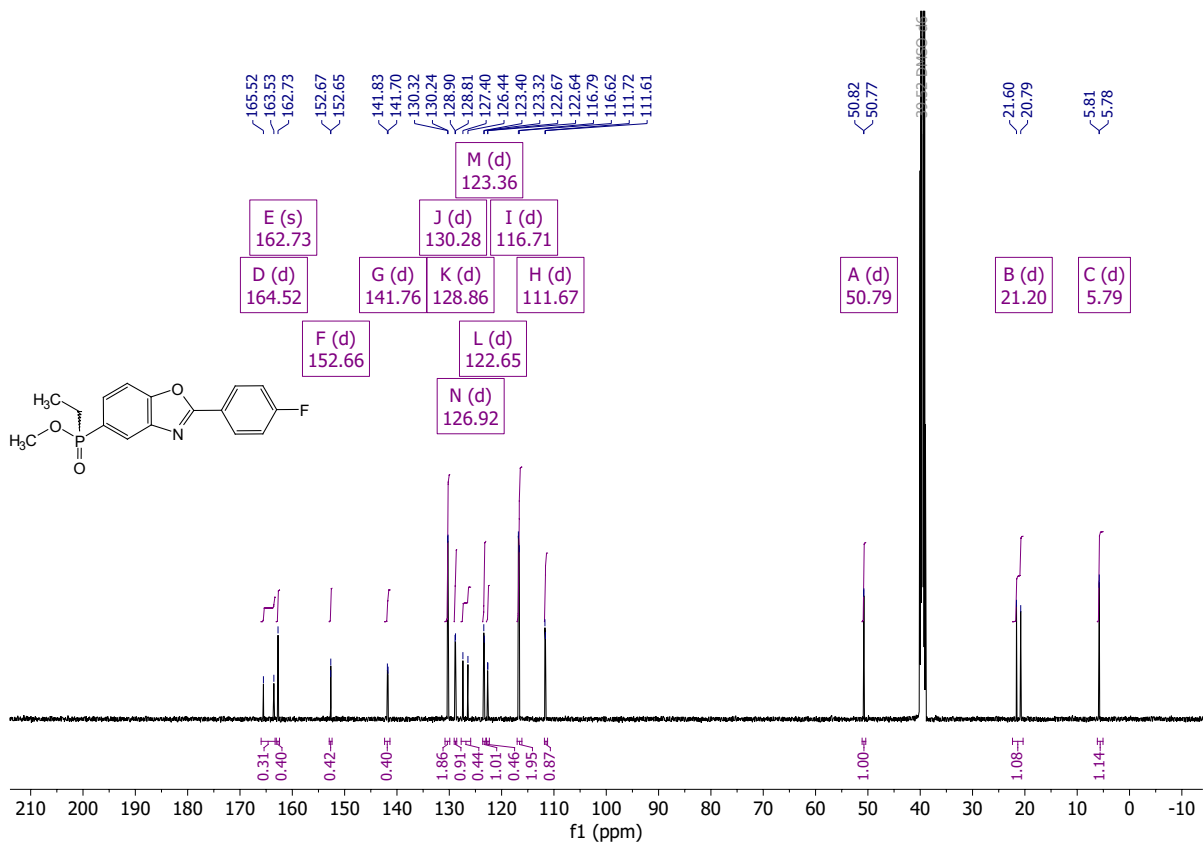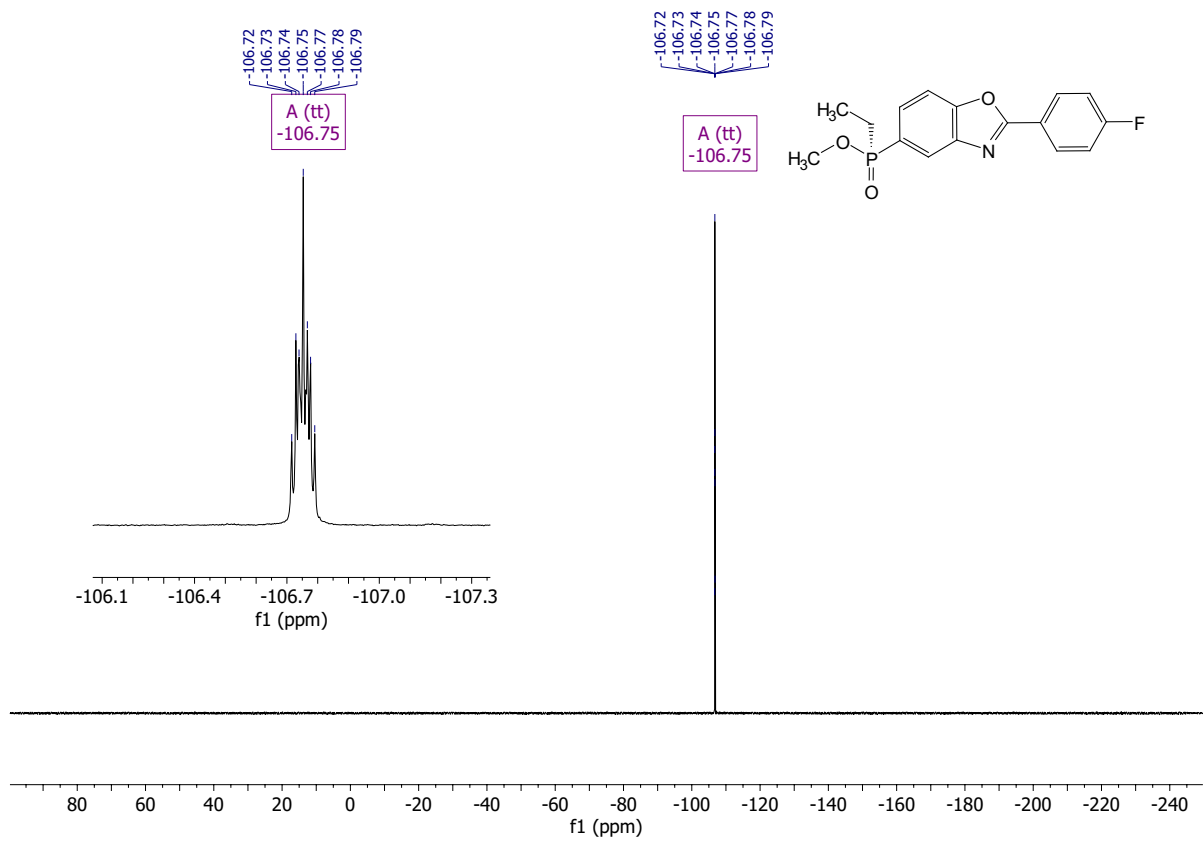

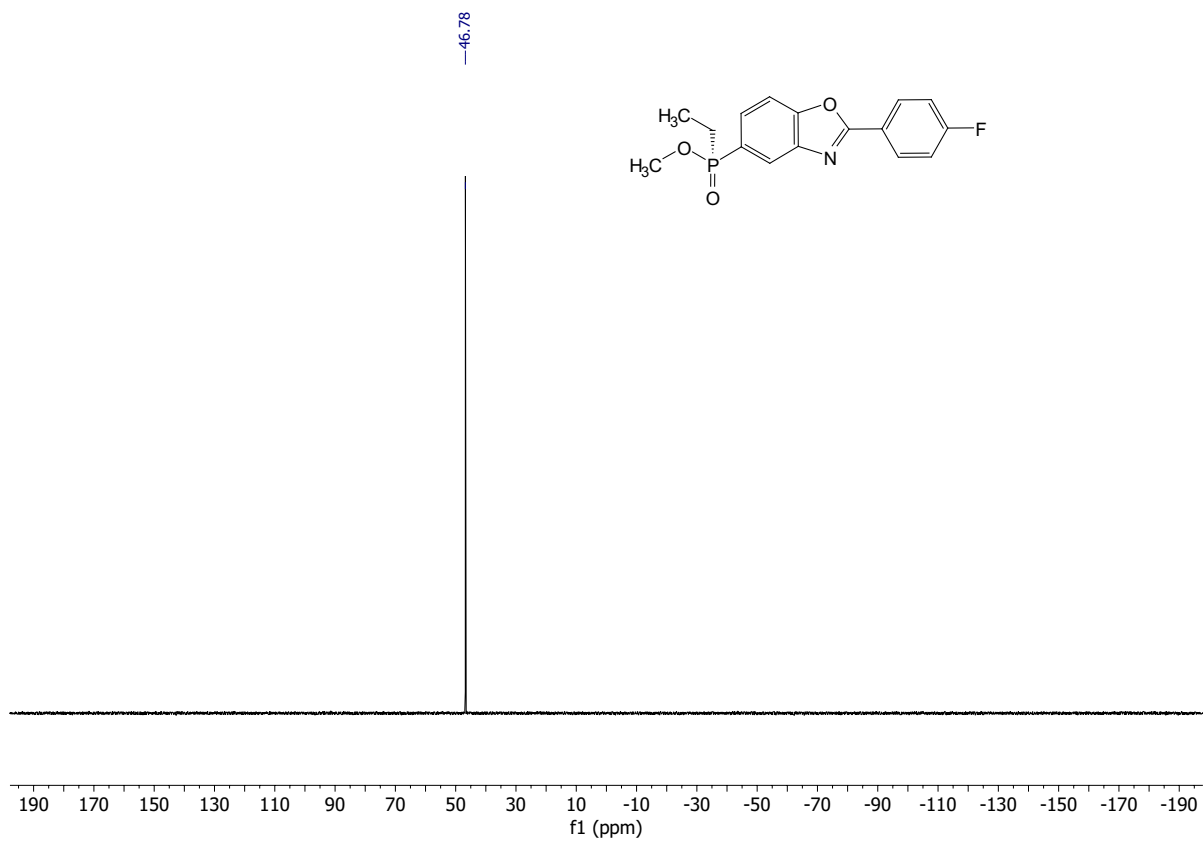

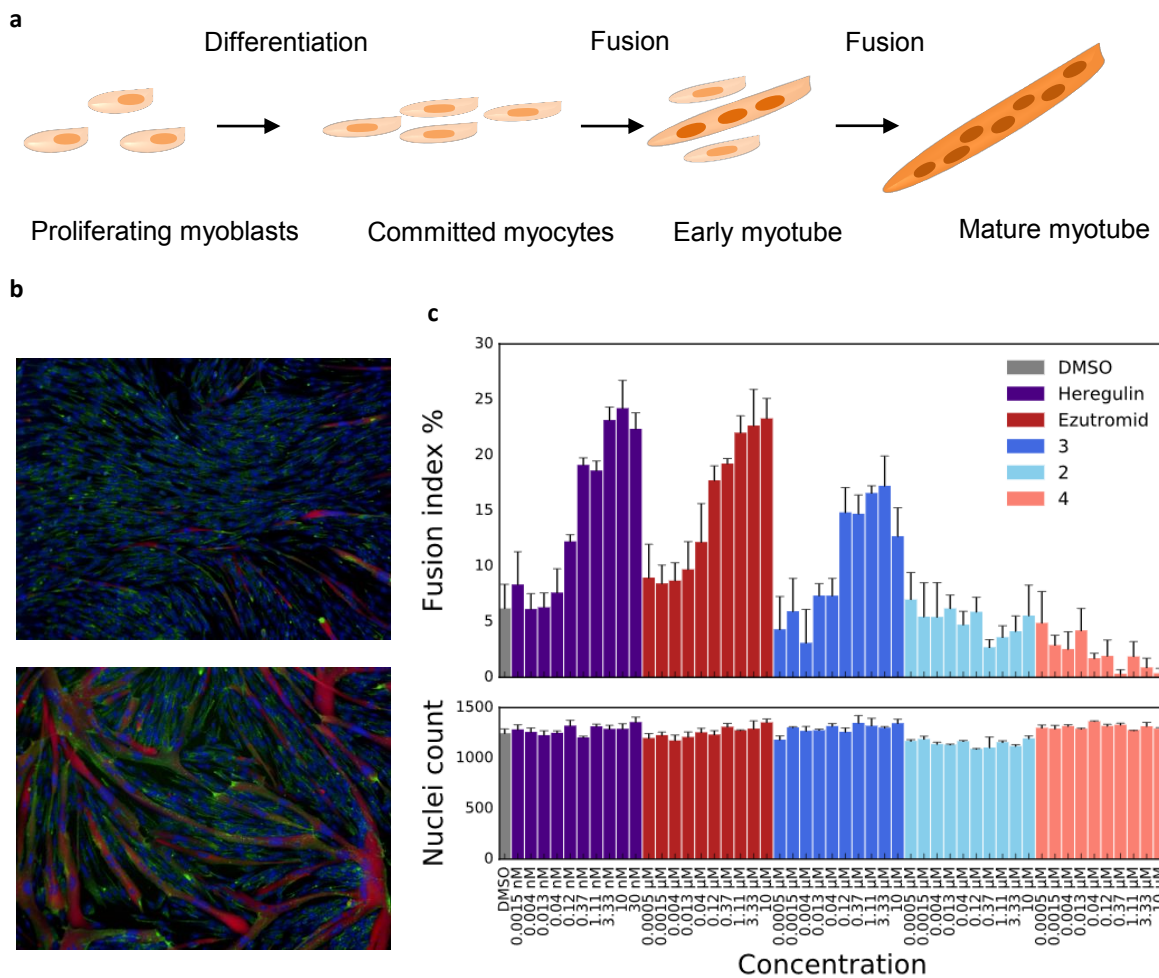

**Figure S1. Utrophin modulators such as heregulin, ezutromid and probe 3 increase fusion of DMD myoblasts into mature myotubes.** **a**) Schematic of the process of fusion of proliferating myoblasts into myotubes. **b**) Immortalised DMD myoblasts were treated with compound or vehicle (0.1% DMSO) during five days of differentiation, then fixed and stained for utrophin (green), myosin heavy chain (red) and DAPI (blue). Images taken with a Perkin Elmer Operetta high-content imaging system with a 10 × objective; top: vehicle control, bottom: 10 μM ezutromid. **c**) Dose-dependent increase in fusion of myoblasts to mature myotubes after 5 days observed after heregulin and ezutromid treatment is also observed after treatment with probe 3, but not 2 or 4. Fusion index is shown (top) as mean ± SD and nuclei count (bottom) mean ± SD, each n = 4.

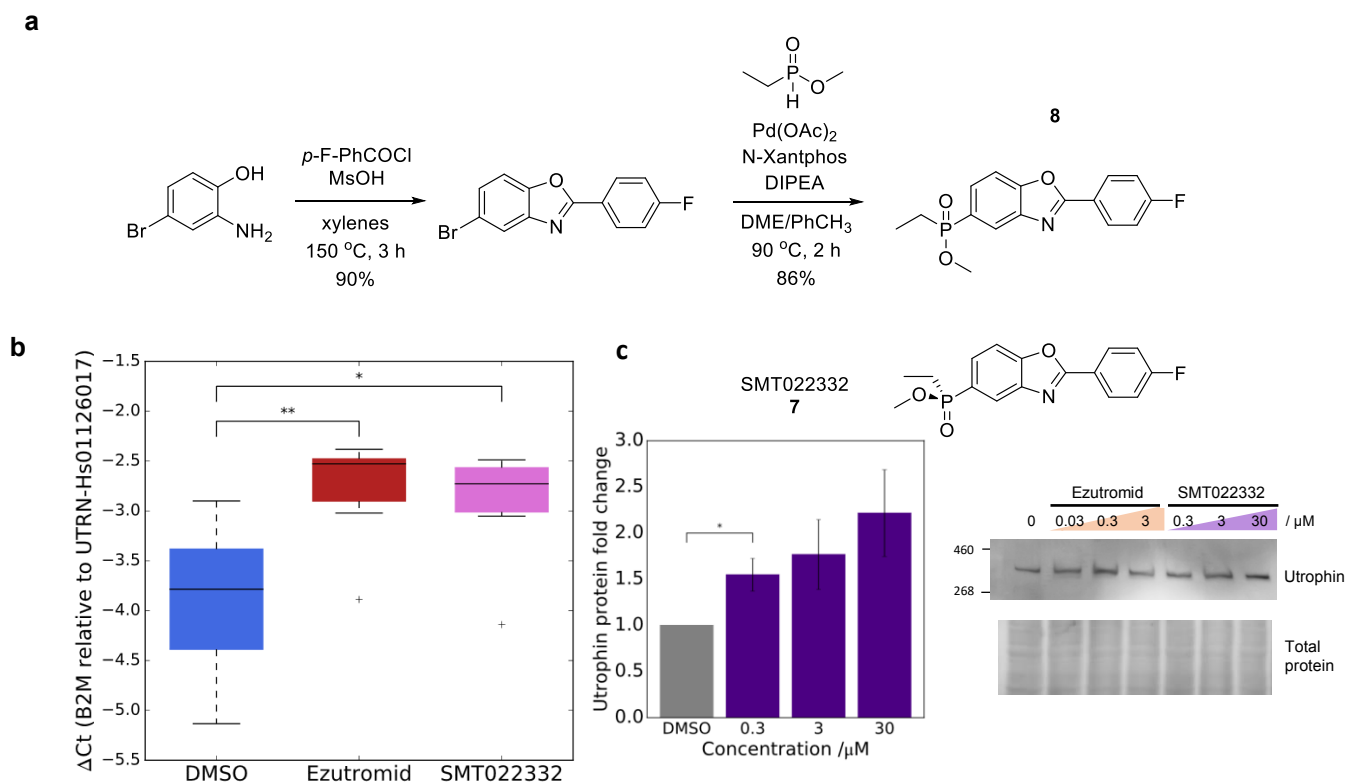

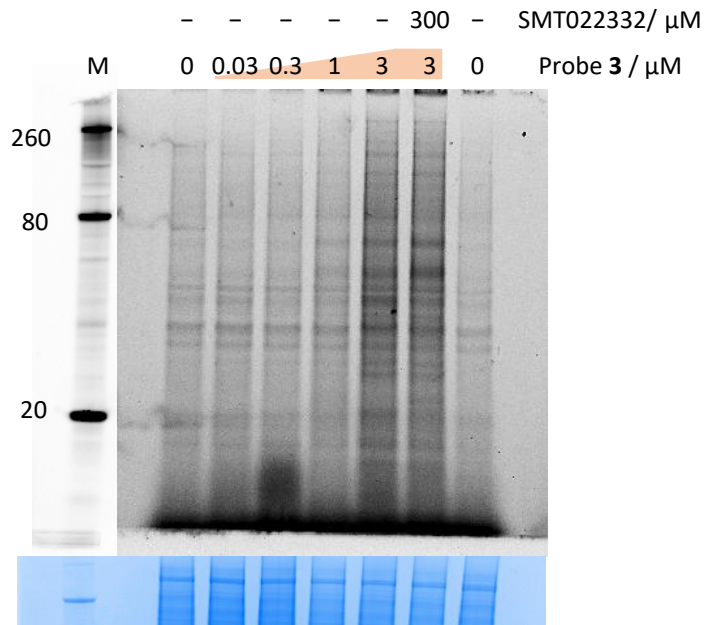

**Figure S3. Probe 3 shows concentration-dependent labelling of protein targets.** H2K *mdx* cells were treated with **3** (2 h) and irradiated (365 nm, 3 min, 0 °C) to trigger crosslinking. Probe labelled proteins were ligated to TAMRA, separated by SDS-PAGE and visualised by in gel fluorescence. M: protein standard, bottom: Coomassie staining as loading control.



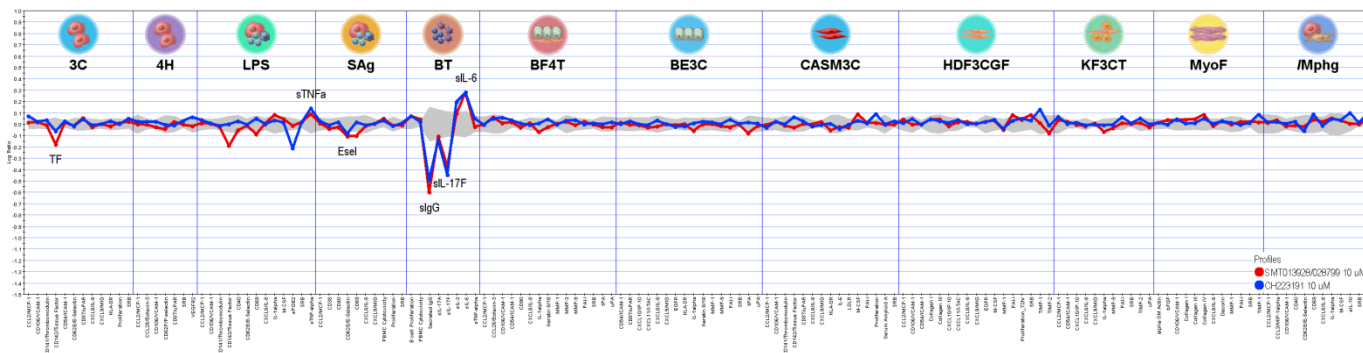

**Figure S4. Ezutromid was profiled in the DiscoverX BioMap Diversity PLUS panel, which monitors changes in activity of 148 biomarkers across 12 different human primary cell-based co-culture systems upon compound treatment, and compares the signature with a reference database of compounds with known mechanism. The profile of ezutromid (10  $\mu$ M, red) best matched the profile of AhR antagonist CH223191 (10  $\mu$ M, blue), Pearson correlation of 0.854. Grey profiles represent baseline variation, biomarkers with activity deviating from the baseline are annotated.**

Figure S5. Uncropped blots from Figure 2

H2K *mdx* cell line

Utrophin

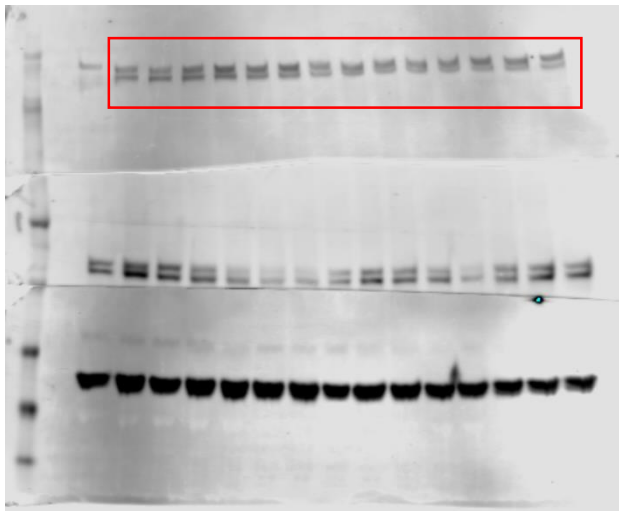

REVERT total protein stain.

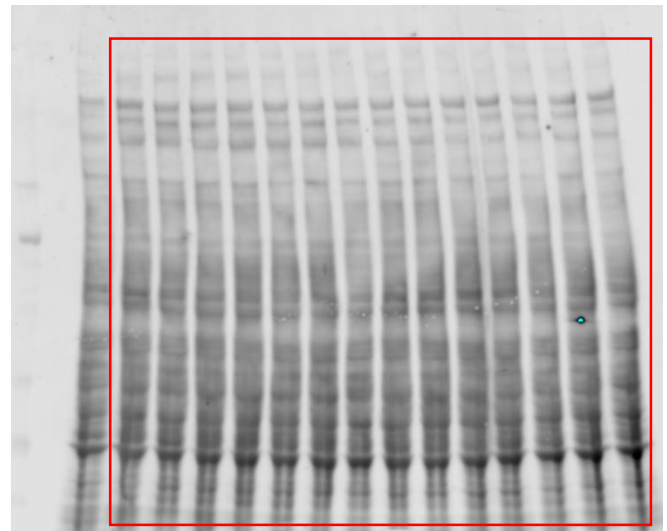

Human DMD cell line

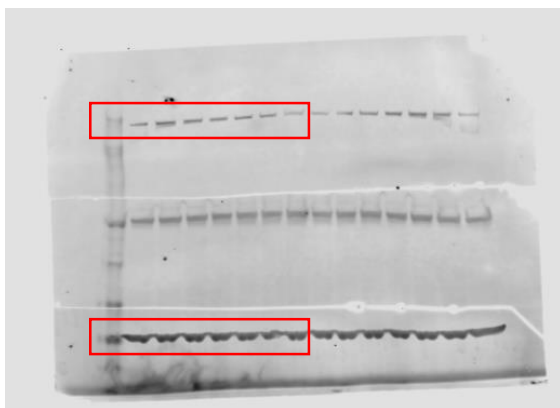

Utrophin

$\beta$ -actin

Figure S6. Uncropped blot from Figure 4

Human DMD cell line

Anti-AhR antibody staining

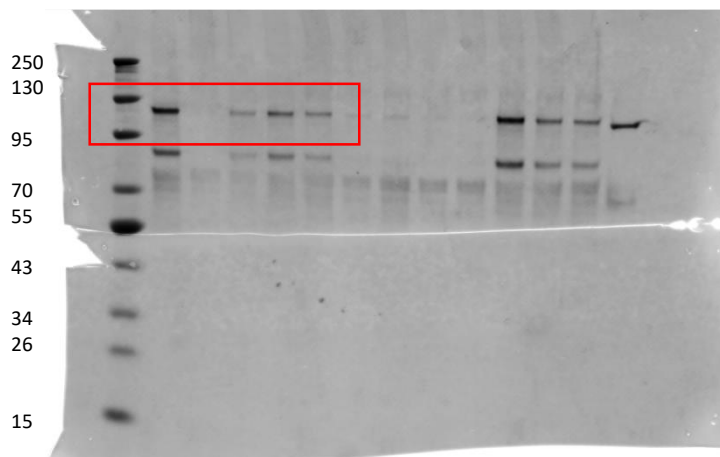

Figure S7. Uncropped blots from Figure 6

Human DMD cell line

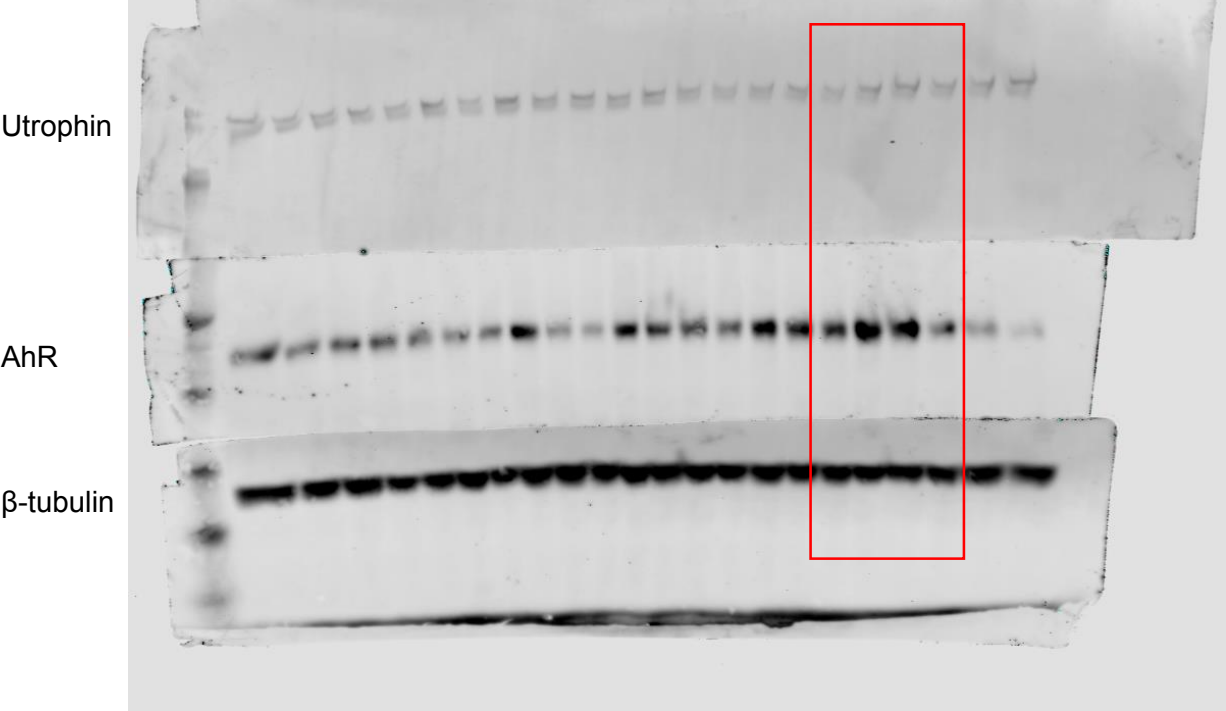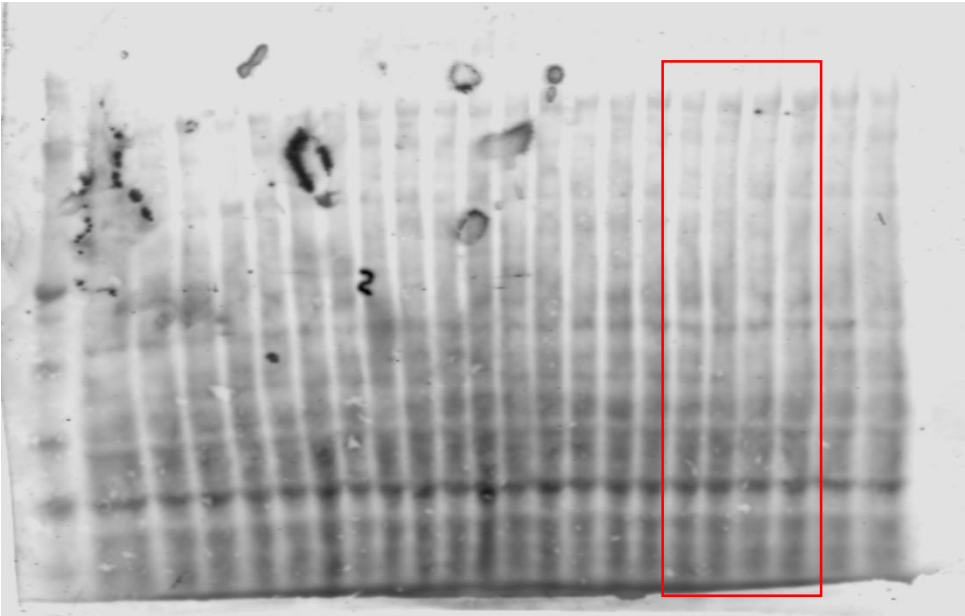

REVERT total protein stain.

Figure S8. Uncropped blots from Supplementary Figure 2

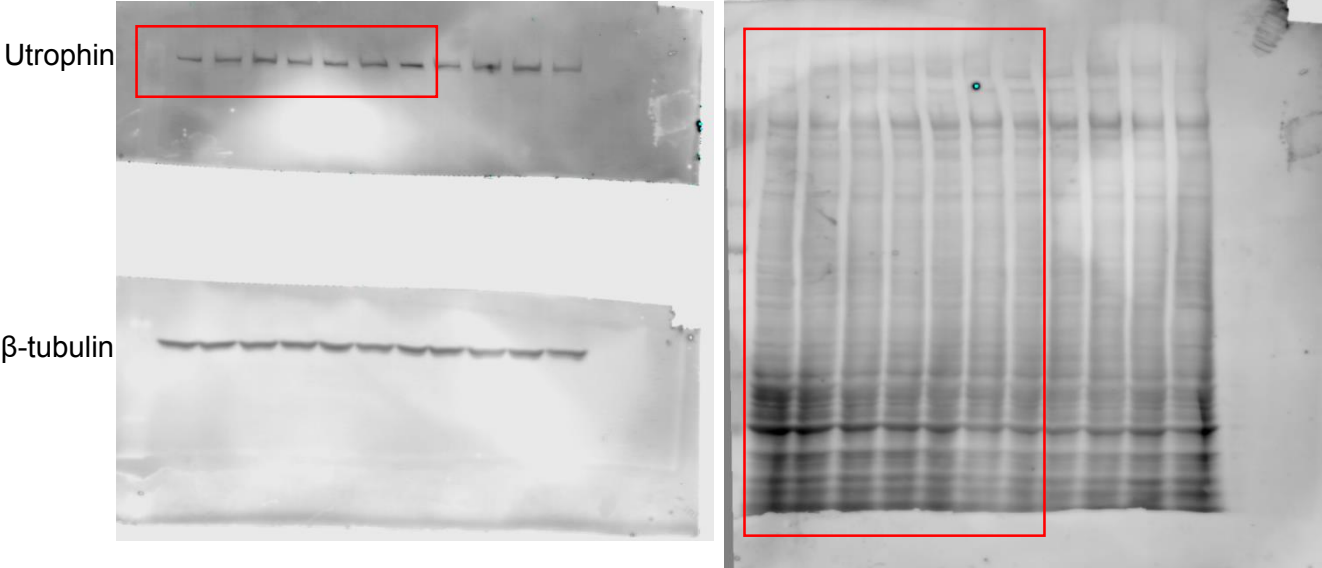

REVERT total protein stain.

## References

- [1] J. E. Morgan, J. R. Beauchamp, C. N. Pagel, M. Peckham, P. Ataliotis, P. S. Jat, M. D. Noble, K. Farmer, T. A. Partridge, *Dev. Biol.* **1994**, *162*, 486–498.
- [2] G. M. Wynne, O. De Moor, C. Lecci, R. Van Well, P. D. Johnson, R. Storer, S. Poignant, S. P. Wren, *Benzoxazole, Benzimidazole and Benzothiazole Derivatives and Their Use in the Treatment of Duchenne Muscular Dystrophy*, **2009**, WO/2009/021750.
- [3] J. M. Tinsley, R. J. Fairclough, R. Storer, F. J. Wilkes, A. C. Potter, S. E. Squire, D. S. Powell, A. Cozzoli, R. F. Capogrosso, A. Lambert, et al., *PLoS One* **2011**, *6*, e19189.
- [4] K. J. Livak, T. D. Schmittgen, *Methods* **2001**, *25*, 402–408.
- [5] W. P. Heal, M. H. Wright, E. Thinon, E. W. Tate, *Nat. Protoc.* **2012**, *7*, 105–117.
- [6] J. R. Wiśniewski, A. Zougman, N. Nagaraj, M. Mann, *Nat. Methods* **2009**, *6*, 359–362.
- [7] J. Cox, M. Mann, *Nat. Biotechnol.* **2008**, *26*, 1367–1372.
- [8] D. Wu, N. Potluri, J. Lu, Y. Kim, F. Rastinejad, *Nature* **2015**, *524*, 303–308.
- [9] D. Wu, X. Su, N. Potluri, Y. Kim, F. Rastinejad, *Elife* **2016**, *5*, DOI 10.7554/eLife.18790.
- [10] D. M. Rudzinski, C. B. Kelly, N. E. Leadbeater, *Chem. Commun.* **2012**, *48*, 9610–9612.



|                                |                                                                      |                          |                               |               |         |         |         |         |         |         |         |         |      |    |      |      |         |            |            |            |           |           |            |            |            |          |
|--------------------------------|----------------------------------------------------------------------|--------------------------|-------------------------------|---------------|---------|---------|---------|---------|---------|---------|---------|---------|------|----|------|------|---------|------------|------------|------------|-----------|-----------|------------|------------|------------|----------|
| Dync1h1                        | Cytoplasmic dynein 1 heavy chain 1                                   | Q9JHU4                   | Q9JHU4                        | 19.9095       | 20.6064 | 19.6306 | 22.5184 | 17.5    | 21.6579 | 17.5    | 17.5    | 17.5    | 4    | 4  | 1.6  | 1.6  | 532.04  | 0.19045000 | 5          | 0.117743   | -0.509938 | 0.30321   | 2.54882    |            |            |          |
| Dync1i2                        | Cytoplasmic dynein 1 intermediate                                    | Q88487;A28F8             | Q88487;A28F8;Q3PT8;AJ         | 17.5          | 20.6201 | 26.5702 | 17.5    | 17.5    | 17.5    | 17.5    | 17.5    | 17.5    | 2    | 2  | 4.9  | 4.9  | 68.393  | 0.101e+08  | 1          | 0.699592   | 4.06343   | 0.699592  | 4.06343    |            |            |          |
| Ebp                            | 3-beta-hydroxyysteroid-DeH8B)DeH1                                    | P70245;AJ2C9             | P70245;AJ2C9                  | 17.5          | 17.5    | 17.5    | 17.5    | 17.5    | 17.5    | 17.5    | 17.5    | 17.5    | 1    | 1  | 5.7  | 5.7  | 26.215  | 0.004008   | 6980200    | 2          | -3.44e-08 | 0.472743  | -1.12076   |            |            |          |
| Eef1a1                         | Elongation factor 1-alpha 1                                          | P02126;Q32H8             | P02126;Q32H8;Q3Y268           | 26.9032       | 28.3132 | 28.8026 | 30.4943 | 28.8704 | 27.8008 | 28.8429 | 28.9332 | 28.9332 | 19   | 19 | 19   | 19   | 50.1113 | 0.78e+09   | 1          | 1.56829    | -0.202695 | 0.147821  | 0.147821   |            |            |          |
| Eef1b;Eef1b2                   | Elongation factor 1-beta                                             | Q70251;MQDQ1             | Q70251;MQDQ5;MQDQW            | 17.5          | 18.1218 | 22.4995 | 21.6397 | 17.5    | 17.5    | 17.5    | 17.5    | 17.5    | 1    | 1  | 6.7  | 6.7  | 24.693  | 0.004115   | 2380000    | 0          | 0.0835356 | 0.49386   | 0.00380426 | 0.0281741  |            |          |
| Eef1d                          | Elongation factor 1-delta                                            | P57776;P57776            | P57776;P57776;P57776-3;D3YUQ9 | 17.5          | 21.3745 | 20.6711 | 17.5    | 17.5    | 17.5    | 17.5    | 23.1128 | 23.73   | 2    | 2  | 12.8 | 12.8 | 13.293  | 0.4359900  | 5          | 0.92058    | 2.34852   | -1.59909  | -1.59909   |            |            |          |
| Eef1g                          | Elongation factor 1-gamma                                            | Q8D8N0                   | Q8D8N0                        | 23.0111       | 24.5284 | 25.1005 | 26.0441 | 24.9351 | 24.6113 | 22.9432 | 24.468  | 25.8936 | 8    | 8  | 8    | 8    | 50.06   | 0.371e+08  | 5          | 0.574925   | -0.981995 | 0.0730712 | -0.220061  |            |            |          |
| Eef2                           | Elongation factor 2                                                  | P82852;O8881             | P82852                        | 24.3428       | 26.4848 | 26.6509 | 27.6161 | 26.9834 | 25.5138 | 25.3346 | 25.8784 | 27.5985 | 17   | 17 | 17   | 17   | 95.313  | 0.131e+09  | 113        | 0.380618   | -0.87263  | 0.167321  | -0.447318  |            |            |          |
| Eef2s1                         | Eukaryotic translation initiation factor G26Y66                      | Q6ZW66                   | Q6ZW66                        | 20.1758       | 21.6619 | 17.5    | 22.0519 | 22.7397 | 23.7977 | 17.5    | 24.872  | 23.3962 | 2    | 2  | 2    | 2    | 36.108  | 0.5583000  | 4          | 1.00311    | -2.90386  | 0.202703  | -2.90386   |            |            |          |
| Eef2s2                         | Eukaryotic translation initiation factor G26Y67                      | Q6ZWK3                   | Q6ZWK3;E0CKJ3                 | 17.5          | 17.5    | 17.5    | 17.5    | 17.5    | 17.5    | 17.5    | 17.5    | 17.5    | 2    | 2  | 2    | 2    | 38.092  | 0.004357   | 7851000    | 1          | 0.146033  | -0.751216 | 0.147821   |            |            |          |
| Eef2s3;Eif2s3x                 | Eukaryotic translation initiation factor G20N02;Q920N1;Q920N2;Q920N1 | Q920N1                   | Q920N1                        | 17.5          | 17.5    | 22.0674 | 22.694  | 17.5    | 20.8507 | 17.5    | 17.5    | 21.5138 | 3    | 3  | 3    | 3    | 11.7    | 0.111      | 10.842000  | 3          | 0.243287  | -1.32578  | 0.0036007  | 0.184526   |            |          |
| Eif3a                          | Eukaryotic translation initiation factor P23116                      | P23116                   | P23116                        | 21.3824       | 22.613  | 22.8739 | 22.9042 | 20.9611 | 22.8029 | 17.5    | 20.4162 | 24.3273 | 5    | 5  | 5    | 5    | 4.2     | 0.16193    | 0.70824000 | 13         | 0.0288211 | 0.0669823 | 0.309855   | 1.5419     |            |          |
| Eif3b                          | Eukaryotic translation initiation factor Q81Z09                      | Q81Z09                   | Q81Z09                        | 17.5          | 17.5    | 17.5    | 23.2217 | 24.2768 | 24.1109 | 21.3676 | 21.0752 | 25.0223 | 3    | 3  | 3    | 3    | 6.4     | 6.4        | 91.3669    | 0.179e+08  | 4         | 3.48479   | -6.36979   | 1.76638    | -4.98838   |          |
| Eif3c                          | Eukaryotic translation initiation factor Q8R184;MQCW                 | Q8R184                   | Q8R184                        | 23.6889       | 24.1716 | 23.7284 | 24.4733 | 20.4159 | 22.9018 | 17.5    | 22.4658 | 23.5536 | 7    | 7  | 7    | 7    | 9       | 9          | 105.53     | 0.182e+08  | 23        | 0.424652  | 1.19262    | 0.628464   | 2.61647    |          |
| Eif3d                          | Eukaryotic translation initiation factor Q70194                      | Q70194                   | Q70194                        | 17.5          | 17.5    | 17.5    | 17.5    | 17.5    | 17.5    | 17.5    | 17.5    | 17.5    | 1    | 1  | 1    | 1    | 4.6     | 4.6        | 63.988     | 0.0        | 0         | 1         | -3.43e-08  | 0          |            |          |
| Eif3i                          | Eukaryotic translation initiation factor Q8Q2Y1                      | Q8Q2Y1                   | Q8Q2Y1                        | 17.5          | 17.5    | 17.5    | 21.0982 | 17.5    | 21.9740 | 20.3968 | 17.5    | 17.5    | 1    | 1  | 1    | 1    | 2       | 2          | 66.612     | 0.004386   | 11212000  | 2         | 0.179878   | -0.655686  | 0.179878   |          |
| Eif4a1;Eif4a2                  | Eukaryotic initiation factor 4A;Eif40k843;P10630                     | P60843;P10630;Q8BTU6;P   | Q8BTU6;P                      | 24.0024       | 25.9397 | 25.4677 | 25.452  | 24.6141 | 24.8227 | 17.5    | 23.7194 | 26.8507 | 8    | 8  | 8    | 8    | 29.3    | 29.3       | 46.153     | 0.433e+08  | 29        | 0.0799327 | 0.173657   | 0.363568   | 2.44656    |          |
| Eif4b                          | Eukaryotic translation initiation factor Q8BGD9                      | Q8BGD9                   | Q8BGD9                        | 21.4504       | 22.2454 | 23.6393 | 22.1482 | 17.5    | 17.5    | 22.4879 | 22.3293 | 17.5    | 17.5 | 2  | 2    | 2.6  | 2.6     | 6.839      | 0.004193   | 51925000   | 6         | 0.947833  | -0.395624  | 0.403264   | 1.6726     |          |
| Eif4g1                         | Eukaryotic translation initiation factor Q6N216;A0A019               | Q6N216;A0A019;YU55;EPYV1 | YU55;EPYV1                    | 22.7295       | 23.4423 | 22.4435 | 25.5366 | 22.4874 | 25.2902 | 17.5    | 24.1822 | 24.5458 | 8    | 8  | 8    | 8    | 8.1     | 8.1        | 176.07     | 0.226e+08  | 16        | 0.698632  | -1.56634   | 0.0698217  | 0.495742   |          |
| Eif4h                          | Eukaryotic translation initiation factor Q6WUK2;Q6WUK2               | Q6WUK2                   | Q6WUK2                        | 17.5          | 20.3496 | 22.4598 | 22.6603 | 17.5    | 22.0283 | 17.5    | 23.5755 | 24.4109 | 2    | 2  | 2    | 2    | 13.3    | 13.3       | 27.341     | 0.6565000  | 4         | 0.139968  | -0.624438  | 0.264994   | -1.7301    |          |
| Eif5a1;Eif5a2                  | Eukaryotic translation initiation factor P63242;Q8BG72               | P63242;Q8BG72;A0A040M    | A0A040M                       | 20.6825       | 17.5    | 17.5    | 17.5    | 20.8304 | 17.5    | 17.5    | 17.5    | 24.1124 | 2    | 2  | 2    | 2    | 3.1     | 3.1        | 137.611    | 0.96131000 | 4         | 0.0105846 | -0.0493056 | 0.17742    | -1.14328   |          |
| Eif6                           | Eukaryotic translation initiation factor Q55135;A6WVZ                | Q55135;A6WVZ             | Q55135;A6WVZ                  | 17.5          | 17.5    | 17.5    | 17.5    | 17.5    | 17.5    | 17.5    | 17.5    | 22.1585 | 1    | 1  | 1    | 1    | 7.3     | 7.3        | 26.511     | 0.19079000 | 2         | -3.43e-08 | 0.427243   | -0.55283   |            |          |
| Elav1                          | ELAV-like protein 1                                                  | P70372                   | P70372                        | 19.3871       | 19.9126 | 20.9303 | 20.3393 | 17.5    | 22.123  | 17.5    | 20.6756 | 21.1576 | 1    | 1  | 1    | 1    | 3.4     | 3.4        | 36.169     | 0.003824   | 16438000  | 4         | 0.212117   | 0.0903619  | 0.0863072  | 0.300044 |
| Eno1                           | Alpha-enolase                                                        | P17182;Q6PHC1            | P17182;Q6PHC1;B0QZL1          | 25.9275       | 27.3236 | 26.8219 | 27.8397 | 26.8873 | 27.0115 | 25.6096 | 27.5835 | 28.5355 | 20   | 20 | 20   | 20   | 55.8    | 55.8       | 47.14      | 0.209e+09  | 103       | 0.47959   | -0.555318  | 0.240087   | -0.584727  |          |
| Epkh1                          | Eppiklike                                                            | Q8R8W0                   | Q8R8W0                        | 17.5          | 17.5    | 17.5    | 20.5283 | 17.5    | 17.5    | 17.5    | 17.5    | 17.5    | 1    | 1  | 1    | 1    | 2.6     | 2.6        | 12.3       | 0.5617000  | 1         | 0.472743  | -1.02094   | 0.4346     | 0          |          |
| Eprs                           | ER functional glutamyl-proline--                                     | Q8R8C7                   | Q8R8C7                        | 21.1198       | 22.8137 | 22.8137 | 22.8137 | 24.1039 | 22.8137 | 22.8137 | 22.8137 | 22.8137 | 12   | 12 | 12   | 12   | 2.5     | 2.5        | 0.5840000  | 0.0        | 0         | 7         | -0.9947022 | -0.483522  | -2.54183   |          |
| Enh                            | Enhancer of rudimentary homeolo-                                     | P84089                   | P84089                        | 17.5          | 21.3157 | 22.4671 | 21.853  | 17.5    | 19.9333 | 17.5    | 17.5    | 20.9869 | 1    | 1  | 1    | 1    | 10.6    | 10.6       | 12.259     | 0.003861   | 17340000  | 1         | 0.124374   | 0.666166   | 1.7653     |          |
| Esd                            | 5'-formylglutathione hydrolase                                       | Q8R0P3;H3BL9             | Q8R0P3;H3BL9;H3B1C6;H         | 21.3018       | 22.3129 | 23.1595 | 23.1494 | 21.3898 | 23.2624 | 17.5    | 20.6393 | 24.028  | 1    | 1  | 1    | 1    | 7.8     | 7.8        | 31.319     | 0.67565000 | 5         | 0.0136215 | -0.0304521 | 0.213384   | 1.53567    |          |
| Fas                            | Fatty acid synthase                                                  | Q8R096                   | Q8R096                        | 19.8905       | 24.2225 | 23.6084 | 24.3877 | 17.5    | 22.8152 | 20.4328 | 22.4234 | 25.1422 | 9    | 9  | 9    | 9    | 4.8     | 4.8        | 272.43     | 0.124e+08  | 16        | 0.135603  | -1.002329  | 0.159573   | -1.53729   |          |
| Flna                           | Filamin-A                                                            | Q8BTM6;B7FAU             | Q8BTM6;B7FAU;B7FAU1           | 26.6317       | 28.2287 | 28.1887 | 29.3637 | 28.4194 | 29.2673 | 25.658  | 27.6399 | 29.6054 | 62   | 62 | 62   | 62   | 36.7    | 36.7       | 281.22     | 0.468e+09  | 374       | 1.03564   | -1.34344   | 0.00786245 | 0.0300255  |          |
| Flnb                           | Filamin-B                                                            | Q8R092                   | Q8R092                        | 22.5119       | 24.932  | 24.6428 | 26.9042 | 24.9422 | 27.7568 | 16.5357 | 24.379  | 27.0584 | 21   | 20 | 20   | 20   | 14.5    | 14.5       | 27.82      | 0.8049000  | 68        | 1.040668  | -0.9961329 | 0.0961329  |            |          |
| Flncl                          | Filamin-C                                                            | Q8VHK6;Q8VHK6            | Q8VHK6;Q8VHK6                 | 23.6115       | 25.2705 | 24.3837 | 24.1303 | 24.9657 | 26.4391 | 22.5646 | 22.7336 | 26.7728 | 26   | 25 | 24   | 24   | 13.2    | 13.2       | 29.212     | 0.503e+08  | 61        | 0.963751  | -1.48643   | 0.00794276 | 0.334956   |          |
| Fscn1                          | Fascin                                                               | Q61553;A0Q155            | A0Q155;A0ADG2;DU7             | 22.2252       | 21.9395 | 22.5411 | 24.2527 | 22.9586 | 22.4539 | 21.8023 | 23.2845 | 24.474  | 4    | 4  | 4    | 4    | 12.6    | 12.6       | 54.507     | 0.106e+08  | 13        | 0.781142  | -1.04412   | 0.322559   | -0.651661  |          |
| Fxdy5                          | FXD domain-containing intran-                                        | P97808;F6TWM             | P97808;F6TWM;F78WJ1           | 17.5          | 24.5493 | 26.0718 | 17.5    | 23.8746 | 19.9363 | 17.5    | 23.6874 | 22.751  | 1    | 1  | 1    | 1    | 5.1     | 5.1        | 19.454     | 0.003876   | 1.41e+08  | 1         | 0.188994   | 1.60341    | 0.160146   | -1.39421 |
| Gadp2                          | Glyceraldehyde 3-phosphate de-                                       | P16858;A0A00             | P16858;A0A00;MQ2F6;S4R        | 25.7838       | 26.7976 | 27.9732 | 27.8606 | 28.2069 | 28.0599 | 25.9109 | 26.4636 | 28.4371 | 15   | 15 | 15   | 15   | 44.7    | 44.7       | 35.81      | 0.22e+09   | 90        | 0.86485   | -1.19092   | 0.028969   | -0.0865339 |          |
| Gab2                           | Interferon-induced gamma-este-                                       | Q920E6                   | Q920E6                        | 17.5          | 17.5    | 17.5    | 17.5    | 23.7884 | 23.7547 | 17.5    | 23.976  | 23.0162 | 2    | 2  | 2    | 2    | 3.7     | 3.7        | 66.739     | 0.77526000 | 7         | 0.935096  | -0.48102   | 0.366408   | -0.584727  |          |
| Rab GDP dissociation inhibitor | beta                                                                 | Q51598                   | Q51598;Q51598-2               | 17.5          | 21.1484 | 17.5    | 22.5017 | 17.5    | 22.0839 | 17.5    | 22.0599 | 17.5    | 2    | 2  | 2    | 2    | 5.8     | 5.8        | 50.537     | 0.2049000  | 8         | 0.075772  | -0.454568  | 0.258168   | -1.17163   |          |
| Gfp1                           | Glutamine-fructose-6-phosphat                                        | ap74856                  | ap74856;ap74856-2             | 17.5          | 17.5    | 17.5    | 21.8445 | 17.5    | 17.5    | 17.5    | 17.5    | 20.588  | 1    | 1  | 1    | 1    | 2.3     | 2.3        | 78.538     | 0.8190200  | 2         | 0.427243  | -1.44715   | 0.427243   | -1.02934   |          |
| Glu1d                          | Glutamate dehydrogenase 1,                                           | mitocP26443              | F7CFA5                        | P26443;F7CFA5 | 19.8764 | 17.5    | 17.5    | 22.9296 | 17.5    | 19.5879 | 17.5    | 17.5    | 1    | 1  | 1    | 1    | 3.8     | 3.8        | 61.336     | 0.15591000 | 2         | 0.397371  | -1.50137   | 0.117224   | -0.483901  |          |
| Gms41a                         | Guanine nucleotide-binding                                           | Q61F28                   | Q61F28                        | 23.1169       | 27.2321 | 30.319  | 25.3834 | 26.8819 | 24.9814 | 23.2842 | 26.8292 | 24.237  | 9    | 2  | 2    | 2    | 12.1    | 12.1       | 60.227     | 0.336e+09  | 50        | 0.203299  | 1.14046    | 0.377832   | 2.10591    |          |
| Gms2;Gnao1;Gnas;Gna3           | Guanine nucleotide-binding                                           | P08752;P18872            | P08752;P18872;P63094;Q        | 19.0141       | 22.2829 | 17.5    | 22.7849 | 17.5    | 21.3459 | 17.5    | 17.5    | 21.0531 | 3    | 2  | 2    | 2    | 7.3     | 7.3        | 40.489     | 0.002212   | 24266000  | 5         | 0.16845</  |            |            |          |



|              |                                             |                                                                                |         |         |         |         |         |          |         |         |          |         |    |    |      |      |      |         |          |           |            |           |            |             |            |           |
|--------------|---------------------------------------------|--------------------------------------------------------------------------------|---------|---------|---------|---------|---------|----------|---------|---------|----------|---------|----|----|------|------|------|---------|----------|-----------|------------|-----------|------------|-------------|------------|-----------|
| ligp1        | Interferon-inducible GTPase 1               | Q9Q285; Q3UED; Q9Q285                                                          | 21.5097 | 24.4122 | 24.5503 | 25.3955 | 24.3218 | 25.8122  | 21.4445 | 23.5403 | 25.4777  | 7       | 7  | 7  | 24   | 24   | 24   | 47.571  | 0        | 2.88e+08  | 40         | 0.70859   | -1.68572   | 0.000696886 | 0.00326856 |           |
| limpdh2      | inosine-5-monophosphate dehydrogenase 2     | P24547; A0A06 P24547; A0A06AY672                                               | 17.5    | 17.9902 | 17.5    | 17.4261 | 17.5    | 17.20942 | 17.5    | 17.5    | 17.20973 | 3       | 1  | 3  | 7.2  | 7.2  | 7.2  | 55.814  | 0        | 2.0515000 | 4          | 4.61288   | -2.4034    | 0.212142    | -1.10238   |           |
| lipo5        | Impartin-5                                  | QB8KCS; QB8KCS; QB8KCS; QB8KCS-2                                               | 17.5    | 17.5    | 17.5    | 17.5    | 17.5    | 17.5     | 17.5    | 17.5    | 17.5     | 1       | 1  | 1  | 1.5  | 1.5  | 1.5  | 123.59  | 0        | 0         | 1          | 4.34e-08  | 0          | -4.34e-08   | 0          |           |
| lipo9        | Impartin-9                                  | Q91V65; Q91V65; Q91V65; Q91V65; Q91V65; Q91V65; Q91V65; Q91V65; Q91V65; Q91V65 | 17.5    | 17.5    | 22.2533 | 17.5    | 17.5    | 21.9324  | 17.5    | 17.5    | 21.9324  | 1       | 1  | 1  | 2    | 2    | 2    | 116.075 | 0        | 9419100   | 1          | 0.0232228 | 0          | 0.132928    | 0          | 1.61776   |
| lqgap1       | Ras GTPase-activating-like protein 1        | Q9JFK1                                                                         | 20.5814 | 19.068  | 17.5    | 17.5    | 17.5    | 17.5     | 17.5    | 17.5    | 17.5     | 2       | 2  | 2  | 2.1  | 2.1  | 2.1  | 188.74  | 0        | 2.9923000 | 3          | 0.0883769 | -0.572108  | 0.183698    | 0.620031   |           |
| Irgm1        | Immunity-related GTPase family M p          | Q60766; G5NCB1; Q60766; G5NCB5; Q60766-1                                       | 17.5    | 23.2947 | 23.4162 | 21.3827 | 22.2536 | 23.6146  | 17.5    | 21.6918 | 19.8899  | 3       | 3  | 3  | 9    | 9    | 9    | 46.551  | 0        | 5.3510000 | 11         | 0.188321  | -1.0133    | 0.30247     | 1.70976    |           |
| Irtg1        | Integrin beta-1                             | P09055; P09055; P09055; P09055-2                                               | 21.4053 | 21.8273 | 22.0607 | 22.5349 | 21.5    | 22.9887  | 17.5    | 17.5    | 22.6231  | 2       | 2  | 2  | 4.6  | 4.6  | 4.6  | 88.231  | 0        | 3.8131000 | 1          | 1.06055   | 0.756535   | 0.675884    | 2.55671    |           |
| Jup          | Junctin glycoprotein                        | Q02257; Q02257; Q02257                                                         | 29.0322 | 30.0735 | 32.2    | 28.4417 | 28.9022 | 26.9546  | 26.5041 | 29.4443 | 27.8458  | 2       | 2  | 2  | 42.4 | 42.4 | 42.4 | 81.8    | 0        | 1.13e+10  | 344        | 0.993023  | 0.259782   | 0.527632    | 2.50387    |           |
| Kars         | Lysine-tRNA ligase                          | Q9D9M1                                                                         | 20.2145 | 21.6328 | 22.0436 | 21.7172 | 22.3414 | 21.9408  | 21.0366 | 21.4975 | 21.7043  | 1       | 1  | 1  | 2.5  | 2.5  | 2.5  | 8.839   | 0        | 3.9163000 | 7          | 0.530649  | -0.702847  | 0.0687957   | -0.11581   |           |
| Khsr9        | Far upstream element-binding protein        | Q9J4V1                                                                         | 22.3914 | 23.8471 | 24.107  | 22.606  | 22.0649 | 24.3949  | 20.7498 | 22.8519 | 24.4717  | 6       | 6  | 6  | 11   | 11   | 11   | 76.775  | 0        | 1.44e+08  | 11         | 0.0257168 | 0.0590988  | 0.274048    | 0.16176    |           |
| Kpn2         | Importin subunit alpha-1                    | P52293; A2A600; P52293; A2A600; A2A601; A                                      | 20.4673 | 20.6091 | 21.1643 | 20.292  | 22.0659 | 22.6744  | 17.5    | 17.5    | 21.9151  | 3       | 3  | 3  | 8.3  | 8.3  | 8.3  | 57.927  | 0        | 2.4881000 | 4          | 0.525683  | -0.930511  | 0.516186    | 1.76324    |           |
| Kpn1         | Importin subunit beta-1                     | P70168                                                                         | 21.149  | 22.8993 | 21.3526 | 24.2172 | 22.8318 | 23.6622  | 19.8216 | 22.951  | 24.0688  | 4       | 4  | 4  | 6.1  | 6.1  | 6.1  | 97.183  | 0        | 9.6696000 | 20         | 2.12641   | -1.77005   | 0.126978    | -0.480134  |           |
| Krt27        | Keratin, type I cytoskeletal 27             | Q92320                                                                         | 17.5    | 20.6878 | 17.5    | 22.1141 | 17.5    | 17.5     | 17.5    | 17.5    | 17.5     | 2       | 2  | 2  | 2    | 2    | 2    | 49.104  | 0        | 1.6228700 | 1          | 0.0905591 | -0.475437  | 0.427243    | 1.02621    |           |
| Krt76        | Keratin, type II cytoskeletal 2 oral        | Q3UV17                                                                         | 31.0281 | 31.5905 | 32.5898 | 30.7475 | 31.4087 | 29.5952  | 29.1806 | 31.1945 | 30.0894  | 17      | 2  | 2  | 14.6 | 14.6 | 14.6 | 29.944  | 0        | 2.66e+10  | 99         | 0.757399  | 1.15234    | 0.633224    | 3.58131    |           |
| Lap3         | Cytosol aminopeptidase                      | Q9C9Y7; Q9C9Y7; Q9C9Y7; Q9C9Y7-2                                               | 17.5    | 17.5    | 17.5    | 17.1162 | 17.5    | 21.5057  | 17.5    | 17.5    | 21.8994  | 1       | 1  | 1  | 2.3  | 2.3  | 2.3  | 56.141  | 0.00426  | 1.0942000 | 1          | 0.934844  | 0          | 0.427243    | -1.46645   |           |
| Lasp1        | LM and SH3 domain protein 1                 | Q51792; A2AG65; Q51792; A2AG65; A2AG65H                                        | 25.3847 | 22.8213 | 22.923  | 22.9467 | 17.5    | 17.5     | 17.5    | 21.5556 | 24.6293  | 6       | 6  | 6  | 27   | 27   | 27   | 27      | 27       | 29.894    | 0          | 1.59e+08  | 5          | 1.03191     | 0.484348   | 2.48138   |
| Ldha         | L-lactate dehydrogenase A chain; l          | P06151; A0A180 P06151; A0A180G9S; Q5G6                                         | 24.0309 | 25.397  | 25.2958 | 26.4855 | 25.7034 | 24.8878  | 25.9082 | 24.7444 | 26.4599  | 9       | 9  | 9  | 27.1 | 27.1 | 27.1 | 23.5    | 36.498   | 0.60e+08  | 9          | 5.44079   | -0.784376  | 0.522398    | -0.976291  |           |
| Lgal1        | Galectin-1                                  | P16045                                                                         | 20.0773 | 22.6776 | 22.5932 | 22.0898 | 17.5    | 17.3521  | 17.5    | 17.5    | 23.3823  | 1       | 1  | 1  | 13.3 | 13.3 | 13.3 | 14.866  | 0        | 5.5997000 | 5          | 0.151791  | 0.8021     | 0.470323    | 2.32195    |           |
| Lgal3        | Galectin-3                                  | P16110; Q8C253; P16110; Q8C253                                                 | 17.5    | 17.8967 | 23.4251 | 21.809  | 17.5    | 17.5     | 17.5    | 17.5    | 21.7013  | 21      | 21 | 21 | 4.2  | 4.2  | 4.2  | 27.55   | 0.004073 | 3.3712000 | 4          | 0.36677   | 0.200428   | 0.119733    | 0.733878   |           |
| Lmna         | Prefoldin-A/C; Lamin-A/C                    | P48678; P48678; P48678; P48678-2; P48678                                       | 25.9729 | 26.0056 | 26.5895 | 26.043  | 25.7161 | 24.4837  | 17.5    | 26.3877 | 26.37    | 19      | 19 | 19 | 34.7 | 34.7 | 34.7 | 24.737  | 0        | 7.36e+08  | 84         | 0.684003  | 0.77057    | 0.394423    | 2.77012    |           |
| Lnc59        | Leucine-rich repeat-containing protein      | Q92238                                                                         | 17.5    | 17.4683 | 25.8321 | 23.5401 | 20.1431 | 19.983   | 17.5    | 19.8986 | 20.9087  | 3       | 3  | 3  | 12.4 | 12.4 | 12.4 | 34.877  | 0.00232  | 8459000   | 5          | 0.0485234 | 0.370077   | 0.376606    | 2.32408    |           |
| Lrrfp1       | Leucine-rich repeat flightless-interer      | Q3U239; Q3U239; Q3U239; Q3U239-3                                               | 17.5    | 17.5    | 17.5    | 17.1971 | 17.5    | 17.5     | 17.5    | 17.0975 | 21.953   | 1       | 1  | 1  | 4.3  | 4.3  | 4.3  | 79.248  | 0.004167 | 8287500   | 3          | 0.427243  | -1.23238   | 0.923665    | -0.629305  |           |
| Luc7/2       | Putative RNA-binding protein Luc7           | Q7TNC4; EQ715; Q7TNC4; EQ715; Q7TNC4-2                                         | 21.1396 | 21.8737 | 22.6307 | 23.3597 | 21.051  | 21.7887  | 17.5    | 21.9077 | 24.6604  | 5       | 5  | 5  | 15.6 | 15.6 | 15.6 | 46.582  | 0        | 1.56e+08  | 11         | 0.091331  | -0.203171  | 0.087628    | -2.52304   |           |
| Luc7/3       | Luc7-like protein 3                         | Q5SU72; Q5SU72; Q5SU72; Q5SU72-3; Q5SU72                                       | 20.6796 | 17.5    | 23.5385 | 20.173  | 17.5    | 20.4683  | 17.5    | 17.5    | 22.1159  | 23.4488 | 5  | 5  | 5    | 2    | 2    | 2       | 13       | 51.45     | 0.93135000 | 15        | 0.00521978 | 0.0395857   | 0.0527778  | -0.379541 |
| Ly1/1, Ly2/2 | Lyzozyme C-1; Lyzozyme C-2                  | P17897; P08905; P17897; P08905                                                 | 22.1381 | 23.933  | 25.1281 | 24.0457 | 17.5    | 17.5     | 20.3862 | 24.2608 | 24.6291  | 2       | 2  | 2  | 14.2 | 14.2 | 14.2 | 16.794  | 0        | 1.79e+08  | 23         | 0.796912  | 0.405117   | 0.148071    | 0.641027   |           |
| Makp4        | Microtubule-associated protein 4            | NV P27546; P27546; P27546; P27546; P27546                                      | 17.5    | 17.5    | 17.5    | 17.4869 | 17.5    | 17.5     | 17.5    | 17.5    | 17.5     | 2       | 2  | 2  | 2.3  | 2.3  | 2.3  | 117.43  | 0.004133 | 1715000   | 2          | 0.427243  | -1.32898   | 0.917556    | -0.570716  |           |
| Mark3        | Microtubule-associated protein C-kinase     | P28645                                                                         | 28.5    | 29.661  | 17.5    | 17.5    | 17.5    | 17.5     | 17.5    | 23.196  | 28.65    | 10      | 10 | 10 | 28.5 | 28.5 | 28.5 | 29.661  | 0        | 1.31e+08  | 10         | 0.427243  | 0.0590988  | 0.274048    | 0.16176    |           |
| Mark3L1      | MARCKS-related protein                      | P28667                                                                         | 21.8622 | 20.6345 | 17.5    | 22.1318 | 17.5    | 21.8092  | 20.2397 | 22.784  | 20.141   | 2       | 2  | 2  | 27.5 | 27.5 | 27.5 | 27.5    | 0        | 6.5424000 | 9          | 0.0887011 | -0.492443  | 0.507568    | -0.20469   |           |
| Mars         | Methionine-tRNA ligase, cytoplasm           | Q68FL6; EQ80B2; Q68FL6; EQ80B2                                                 | 17.5    | 17.5    | 17.5    | 17.7121 | 17.5    | 17.7606  | 17.5    | 17.5    | 20.6558  | 3       | 3  | 3  | 5.1  | 5.1  | 5.1  | 101.43  | 0        | 9.603800  | 3          | 0.935074  | -2.82722   | 0.427243    | -1.05193   |           |
| Mat2a        | S-adenosylmethionine synthase isoform       | Q3TH56; A0A0U1 Q3TH56; A0A0U1RNT6; A0A1                                        | 17.5    | 17.5    | 17.5    | 17.1927 | 17.5    | 17.5     | 17.5    | 17.5    | 21.3707  | 2.455   | 2  | 2  | 7.6  | 7.6  | 7.6  | 43.688  | 0        | 1.3216000 | 4          | 0.427243  | 1.23089    | 0.68201     | -1.711     |           |
| Matr3        | Matrin-3                                    | Q8K130; A0A087 Q8K130; A0A087SPT7; A0A                                         | 17.5    | 17.5    | 17.5    | 17.1722 | 21.2393 | 20.675   | 17.5    | 20.9298 | 22.5349  | 2       | 2  | 2  | 3.9  | 3.9  | 3.9  | 94.629  | 0.00566  | 14587000  | 3          | 4.41828   | -3.52888   | 0.885332    | -2.82158   |           |
| Mcc1         | Nucleosyltransferase CoA carboxylase        | Q92238                                                                         | 18.833  | 28.3745 | 28.9881 | 27.6604 | 28.3045 | 28.0596  | 23.3378 | 18.7549 | 23.0882  | 27      | 27 | 27 | 45.3 | 45.3 | 45.3 | 79.343  | 0        | 1.74e+09  | 108        | 0.627574  | -2.69665   | 0.429445    | 3.61513    |           |
| Mcm3         | DNA replication licensing factor            | P25206                                                                         | 17.5    | 17.5    | 20.7799 | 17.5    | 17.5    | 21.2638  | 17.5    | 17.5    | 21.7682  | 2       | 2  | 2  | 3.9  | 3.9  | 3.9  | 91.545  | 0        | 7.8902000 | 3          | 0.0327153 | -0.16182   | 0.063816    | -0.329444  |           |
| Mcm4         | DNA replication licensing factor            | MCP P49717                                                                     | 17.5    | 17.5    | 17.5    | 17.5    | 17.5    | 17.5     | 17.5    | 17.5    | 22.5388  | 1       | 1  | 1  | 3.1  | 3.1  | 3.1  | 96.735  | 0.003884 | 6093300   | 1          | -4.34e-08 | 0          | 0.427243    | -1.6796    |           |
| Mdh2         | Malate dehydrogenase, mitochondrion         | P08249; A0A002 Q08249                                                          | 22.0254 | 23.2411 | 24.7587 | 25.5899 | 21.6423 | 25.2982  | 23.7261 | 22.6858 | 26.0941  | 5       | 5  | 5  | 20.4 | 20.4 | 20.4 | 35.611  | 0        | 2.68e+08  | 17         | 0.217181  | -0.835065  | 0.265689    | -0.826939  |           |
| Mif          | Macrophage migration inhibitory factor      | P34884                                                                         | 21.1735 | 18.7858 | 23.3108 | 23.6469 | 17.5    | 17.8997  | 20.2435 | 24.1166 | 22.1731  | 2       | 2  | 2  | 15.7 | 15.7 | 15.7 | 12.504  | 0        | 7.7553000 | 9          | 0.0109314 | 0.0745099  | 0.334719    | -1.42106   |           |
| Moin         | Moesin                                      | P26041; P26043; P26041                                                         | 23.8322 | 24.4018 | 24.436  | 25.8035 | 23.3901 | 25.6917  | 18.2949 | 21.7089 | 27.3593  | 19      | 19 | 19 | 31.7 | 31.7 | 31.7 | 67.766  | 0        | 4.61e+08  | 40         | 0.632987  | -0.737747  | 0.269546    | 1.80259    |           |
| Mpp          | 5-methyl-5-thioadenosine phosphotransferase | Q9C065                                                                         | 17.5    | 17.5    | 20.2169 | 17.5    | 20.6958 | 17.5     | 17.5    | 21.2062 | 17.5     | 2       | 2  | 2  | 12.4 | 12.4 | 12.4 | 31.062  | 0        | 1.2802000 | 2          | 0.0477066 | 0.183929   | 0.062804    | 0.31742    |           |
| Mthf1        | C-1-methylhydrofolate synthase, cytosol     | Q922D8                                                                         | 17.5    | 20.6006 | 17.5    | 21.4243 | 17.5    | 17.8768  | 17.5    | 17.5    | 19.9685  | 3       | 3  | 3  | 3.6  | 3.6  | 3.6  | 101.2   | 0        | 13226000  | 6          | 1.29178   | -2.92107   | 0.055023    | 0.210712   |           |
| Mtpn         | Mp2774                                      | P62774                                                                         | 21.7067 | 22.232  | 22.83   | 22.9199 | 17.5    | 17.5     | 17.5    | 20.9865 | 23.8841  | 2       | 2  | 2  | 30.5 | 30.5 | 30.5 | 12.861  | 0        | 1.8287000 | 6          | 0.736274  | 2.94957    | 1.46601     | 1.64601    |           |
| Myadm        | Myoid-associated differentiation n          | Q35682; A0A00N Q35682; A0A00N5W94                                              | 20.9968 | 23.0301 | 23.312  |         |         |          |         |         |          |         |    |    |      |      |      |         |          |           |            |           |            |             |            |           |

|         |                                      |               |               |         |         |         |         |         |         |         |         |         |   |   |   |      |      |       |         |            |          |            |            |           |           |           |
|---------|--------------------------------------|---------------|---------------|---------|---------|---------|---------|---------|---------|---------|---------|---------|---|---|---|------|------|-------|---------|------------|----------|------------|------------|-----------|-----------|-----------|
| Prdx6   | Peroxisredoxin-6                     | O08709;A0AAE  | O08709;A0AAE  | 17.5    | 22.0556 | 17.5    | 22.5659 | 17.5    | 22.0982 | 17.5    | 17.5    | 22.8952 | 1 | 1 | 1 | 9.4  | 9.4  | 9.4   | 24.87   | 0.36154000 | 4        | 0.313886   | -1.70283   | 0.0404389 | -0.279853 |           |
| Prp2    | Prolyl endopeptidase                 | OQUR6         | OQUR6         | 17.5    | 17.5    | 17.5    | 22.6799 | 17.5    | 17.5    | 17.5    | 17.5    | 22.8954 | 2 | 2 | 2 | 4.5  | 4.5  | 4.5   | 80.751  | 0.21946000 | 3        | 0.427243   | -1.72663   | -1.79846  |           |           |
| Prp21   | DNA primase large subunit            | P33610        | P33610        | 25.6557 | 26.1555 | 28.0001 | 24.9167 | 24.7042 | 25.5249 | 28.2007 | 24.9322 | 17.5    | 2 | 2 | 2 | 4.8  | 4.8  | 4.8   | 58.408  | 0.0039314  | 8.026408 | 4          | 1.35139    | 2.34182   | 0.100781  |           |
| Prp38a  | Pre-mRNA splicing factor 38A         | O04F66;O4F66  | O4F66;O4F66   | 20.3008 | 17.5    | 17.5    | 22.7865 | 17.5    | 20.9515 | 17.5    | 17.5    | 22.2455 | 1 | 1 | 1 | 5.3  | 5.3  | 5.3   | 28.532  | 0.19671000 | 6        | 0.438989   | -0.132328  | 0.128012  | -0.637871 |           |
| Prpf40a | Pre-mRNA processing factor 40b       | OQ1C7;OQ1C1   | OQ1C7;OQ1C1   | 17.5    | 17.5    | 17.5    | 20.5751 | 17.5    | 17.5    | 17.5    | 17.5    | 17.5    | 1 | 1 | 1 | 1.7  | 1.7  | 1.7   | 108.48  | 0.20232000 | 2        | 0.427243   | -1.02502   | -4.34E-08 | 0         |           |
| Psm1a   | Proteasome subunit alpha type-1      | OQR1P4        | OQR1P4        | 20.5372 | 21.0204 | 17.5    | 20.85   | 17.5    | 17.5    | 17.5    | 17.5    | 17.5    | 1 | 1 | 1 | 5.7  | 5.7  | 5.7   | 29.546  | 0.5538600  | 2        | 0.273334   | -1.0692    | 1.28585   | 0         |           |
| Psm3a   | Proteasome subunit alpha type-3      | O70435;EDC23  | O70435;EDC23  | 21.5416 | 21.7751 | 17.5    | 21.4407 | 17.5    | 21.8466 | 17.5    | 17.5    | 21.6966 | 1 | 1 | 1 | 7.5  | 7.5  | 7.5   | 28.405  | 0.24768000 | 3        | 0.00163637 | 0.00983556 | 0.280501  | 1.37336   |           |
| Psm3b   | Proteasome subunit alpha type-3      | OQUM9;EDC18   | OQUM9;EDC18   | 17.5    | 17.5    | 17.5    | 17.5    | 17.5    | 17.5    | 17.5    | 17.5    | 23.7713 | 1 | 1 | 1 | 7.3  | 7.3  | 7.3   | 27.372  | 0.21704000 | 3        | -4.34E-08  | 0          | -0.427243 | -2.09044  |           |
| Psm3c   | Proteasome subunit alpha type-3      | OQUM9;EDC18   | OQUM9;EDC18   | 17.5    | 17.5    | 17.5    | 17.5    | 17.5    | 17.5    | 17.5    | 17.5    | 23.7713 | 1 | 1 | 1 | 7.3  | 7.3  | 7.3   | 27.372  | 0.21704000 | 3        | -4.34E-08  | 0          | -0.427243 | -2.09044  |           |
| Psm3d   | Proteasome subunit alpha type-3      | OQUM9;EDC18   | OQUM9;EDC18   | 17.5    | 17.5    | 17.5    | 17.5    | 17.5    | 17.5    | 17.5    | 17.5    | 23.7713 | 1 | 1 | 1 | 7.3  | 7.3  | 7.3   | 27.372  | 0.21704000 | 3        | -4.34E-08  | 0          | -0.427243 | -2.09044  |           |
| Psm3e   | Proteasome subunit alpha type-3      | OQUM9;EDC18   | OQUM9;EDC18   | 17.5    | 17.5    | 17.5    | 17.5    | 17.5    | 17.5    | 17.5    | 17.5    | 23.7713 | 1 | 1 | 1 | 7.3  | 7.3  | 7.3   | 27.372  | 0.21704000 | 3        | -4.34E-08  | 0          | -0.427243 | -2.09044  |           |
| Psm3f   | Proteasome subunit alpha type-3      | OQUM9;EDC18   | OQUM9;EDC18   | 17.5    | 17.5    | 17.5    | 17.5    | 17.5    | 17.5    | 17.5    | 17.5    | 23.7713 | 1 | 1 | 1 | 7.3  | 7.3  | 7.3   | 27.372  | 0.21704000 | 3        | -4.34E-08  | 0          | -0.427243 | -2.09044  |           |
| Psm3g   | Proteasome subunit alpha type-3      | OQUM9;EDC18   | OQUM9;EDC18   | 17.5    | 17.5    | 17.5    | 17.5    | 17.5    | 17.5    | 17.5    | 17.5    | 23.7713 | 1 | 1 | 1 | 7.3  | 7.3  | 7.3   | 27.372  | 0.21704000 | 3        | -4.34E-08  | 0          | -0.427243 | -2.09044  |           |
| Psm3h   | Proteasome subunit alpha type-3      | OQUM9;EDC18   | OQUM9;EDC18   | 17.5    | 17.5    | 17.5    | 17.5    | 17.5    | 17.5    | 17.5    | 17.5    | 23.7713 | 1 | 1 | 1 | 7.3  | 7.3  | 7.3   | 27.372  | 0.21704000 | 3        | -4.34E-08  | 0          | -0.427243 | -2.09044  |           |
| Psm3i   | Proteasome subunit alpha type-3      | OQUM9;EDC18   | OQUM9;EDC18   | 17.5    | 17.5    | 17.5    | 17.5    | 17.5    | 17.5    | 17.5    | 17.5    | 23.7713 | 1 | 1 | 1 | 7.3  | 7.3  | 7.3   | 27.372  | 0.21704000 | 3        | -4.34E-08  | 0          | -0.427243 | -2.09044  |           |
| Psm3j   | Proteasome subunit alpha type-3      | OQUM9;EDC18   | OQUM9;EDC18   | 17.5    | 17.5    | 17.5    | 17.5    | 17.5    | 17.5    | 17.5    | 17.5    | 23.7713 | 1 | 1 | 1 | 7.3  | 7.3  | 7.3   | 27.372  | 0.21704000 | 3        | -4.34E-08  | 0          | -0.427243 | -2.09044  |           |
| Psm3k   | Proteasome subunit alpha type-3      | OQUM9;EDC18   | OQUM9;EDC18   | 17.5    | 17.5    | 17.5    | 17.5    | 17.5    | 17.5    | 17.5    | 17.5    | 23.7713 | 1 | 1 | 1 | 7.3  | 7.3  | 7.3   | 27.372  | 0.21704000 | 3        | -4.34E-08  | 0          | -0.427243 | -2.09044  |           |
| Psm3l   | Proteasome subunit alpha type-3      | OQUM9;EDC18   | OQUM9;EDC18   | 17.5    | 17.5    | 17.5    | 17.5    | 17.5    | 17.5    | 17.5    | 17.5    | 23.7713 | 1 | 1 | 1 | 7.3  | 7.3  | 7.3   | 27.372  | 0.21704000 | 3        | -4.34E-08  | 0          | -0.427243 | -2.09044  |           |
| Psm3m   | Proteasome subunit alpha type-3      | OQUM9;EDC18   | OQUM9;EDC18   | 17.5    | 17.5    | 17.5    | 17.5    | 17.5    | 17.5    | 17.5    | 17.5    | 23.7713 | 1 | 1 | 1 | 7.3  | 7.3  | 7.3   | 27.372  | 0.21704000 | 3        | -4.34E-08  | 0          | -0.427243 | -2.09044  |           |
| Psm3n   | Proteasome subunit alpha type-3      | OQUM9;EDC18   | OQUM9;EDC18   | 17.5    | 17.5    | 17.5    | 17.5    | 17.5    | 17.5    | 17.5    | 17.5    | 23.7713 | 1 | 1 | 1 | 7.3  | 7.3  | 7.3   | 27.372  | 0.21704000 | 3        | -4.34E-08  | 0          | -0.427243 | -2.09044  |           |
| Psm3o   | Proteasome subunit alpha type-3      | OQUM9;EDC18   | OQUM9;EDC18   | 17.5    | 17.5    | 17.5    | 17.5    | 17.5    | 17.5    | 17.5    | 17.5    | 23.7713 | 1 | 1 | 1 | 7.3  | 7.3  | 7.3   | 27.372  | 0.21704000 | 3        | -4.34E-08  | 0          | -0.427243 | -2.09044  |           |
| Psm3p   | Proteasome subunit alpha type-3      | OQUM9;EDC18   | OQUM9;EDC18   | 17.5    | 17.5    | 17.5    | 17.5    | 17.5    | 17.5    | 17.5    | 17.5    | 23.7713 | 1 | 1 | 1 | 7.3  | 7.3  | 7.3   | 27.372  | 0.21704000 | 3        | -4.34E-08  | 0          | -0.427243 | -2.09044  |           |
| Psm3q   | Proteasome subunit alpha type-3      | OQUM9;EDC18   | OQUM9;EDC18   | 17.5    | 17.5    | 17.5    | 17.5    | 17.5    | 17.5    | 17.5    | 17.5    | 23.7713 | 1 | 1 | 1 | 7.3  | 7.3  | 7.3   | 27.372  | 0.21704000 | 3        | -4.34E-08  | 0          | -0.427243 | -2.09044  |           |
| Psm3r   | Proteasome subunit alpha type-3      | OQUM9;EDC18   | OQUM9;EDC18   | 17.5    | 17.5    | 17.5    | 17.5    | 17.5    | 17.5    | 17.5    | 17.5    | 23.7713 | 1 | 1 | 1 | 7.3  | 7.3  | 7.3   | 27.372  | 0.21704000 | 3        | -4.34E-08  | 0          | -0.427243 | -2.09044  |           |
| Psm3s   | Proteasome subunit alpha type-3      | OQUM9;EDC18   | OQUM9;EDC18   | 17.5    | 17.5    | 17.5    | 17.5    | 17.5    | 17.5    | 17.5    | 17.5    | 23.7713 | 1 | 1 | 1 | 7.3  | 7.3  | 7.3   | 27.372  | 0.21704000 | 3        | -4.34E-08  | 0          | -0.427243 | -2.09044  |           |
| Psm3t   | Proteasome subunit alpha type-3      | OQUM9;EDC18   | OQUM9;EDC18   | 17.5    | 17.5    | 17.5    | 17.5    | 17.5    | 17.5    | 17.5    | 17.5    | 23.7713 | 1 | 1 | 1 | 7.3  | 7.3  | 7.3   | 27.372  | 0.21704000 | 3        | -4.34E-08  | 0          | -0.427243 | -2.09044  |           |
| Psm3u   | Proteasome subunit alpha type-3      | OQUM9;EDC18   | OQUM9;EDC18   | 17.5    | 17.5    | 17.5    | 17.5    | 17.5    | 17.5    | 17.5    | 17.5    | 23.7713 | 1 | 1 | 1 | 7.3  | 7.3  | 7.3   | 27.372  | 0.21704000 | 3        | -4.34E-08  | 0          | -0.427243 | -2.09044  |           |
| Psm3v   | Proteasome subunit alpha type-3      | OQUM9;EDC18   | OQUM9;EDC18   | 17.5    | 17.5    | 17.5    | 17.5    | 17.5    | 17.5    | 17.5    | 17.5    | 23.7713 | 1 | 1 | 1 | 7.3  | 7.3  | 7.3   | 27.372  | 0.21704000 | 3        | -4.34E-08  | 0          | -0.427243 | -2.09044  |           |
| Psm3w   | Proteasome subunit alpha type-3      | OQUM9;EDC18   | OQUM9;EDC18   | 17.5    | 17.5    | 17.5    | 17.5    | 17.5    | 17.5    | 17.5    | 17.5    | 23.7713 | 1 | 1 | 1 | 7.3  | 7.3  | 7.3   | 27.372  | 0.21704000 | 3        | -4.34E-08  | 0          | -0.427243 | -2.09044  |           |
| Psm3x   | Proteasome subunit alpha type-3      | OQUM9;EDC18   | OQUM9;EDC18   | 17.5    | 17.5    | 17.5    | 17.5    | 17.5    | 17.5    | 17.5    | 17.5    | 23.7713 | 1 | 1 | 1 | 7.3  | 7.3  | 7.3   | 27.372  | 0.21704000 | 3        | -4.34E-08  | 0          | -0.427243 | -2.09044  |           |
| Psm3y   | Proteasome subunit alpha type-3      | OQUM9;EDC18   | OQUM9;EDC18   | 17.5    | 17.5    | 17.5    | 17.5    | 17.5    | 17.5    | 17.5    | 17.5    | 23.7713 | 1 | 1 | 1 | 7.3  | 7.3  | 7.3   | 27.372  | 0.21704000 | 3        | -4.34E-08  | 0          | -0.427243 | -2.09044  |           |
| Psm3z   | Proteasome subunit alpha type-3      | OQUM9;EDC18   | OQUM9;EDC18   | 17.5    | 17.5    | 17.5    | 17.5    | 17.5    | 17.5    | 17.5    | 17.5    | 23.7713 | 1 | 1 | 1 | 7.3  | 7.3  | 7.3   | 27.372  | 0.21704000 | 3        | -4.34E-08  | 0          | -0.427243 | -2.09044  |           |
| Psm4    | Proteasome non-ATPase regulat        | QD8W5;Q317H   | QD8W5;Q317H   | 19.2911 | 20.5845 | 17.5    | 21.3734 | 17.5    | 17.5    | 17.5    | 17.5    | 22.0991 | 1 | 1 | 1 | 4.6  | 4.6  | 4.6   | 52.895  | 0.002331   | 9423000  | 1          | 0.0747117  | 0.334082  | 0.0172508 | 0.0922057 |
| Psm5    | Proteasome non-ATPase regulat        | QD8W5;Q317H   | QD8W5;Q317H   | 17.5    | 17.5    | 17.5    | 22.2864 | 17.5    | 21.8914 | 19.8828 | 17.5    | 24.312  | 4 | 4 | 4 | 6.1  | 6.1  | 6.1   | 100.2   | 0.38367000 | 8        | 0.398139   | -1.84851   | 0.324898  | -1.84851  |           |
| Psm6    | Proteasome non-ATPase regulat        | P14685        | P14685        | 17.5    | 17.5    | 17.5    | 22.2838 | 17.5    | 22.0587 | 17.5    | 17.5    | 23.3091 | 1 | 1 | 1 | 4.6  | 4.6  | 4.6   | 28.718  | 0.003953   | 33684000 | 2          | 0.312828   | -1.64545  | 0.0645096 | -0.467374 |
| Psm7    | Proteasome non-ATPase regulat        | OQ914         | OQ914         | 17.5    | 17.5    | 17.5    | 21.8596 | 17.5    | 17.5    | 17.5    | 17.5    | 22.7264 | 1 | 1 | 1 | 4.4  | 4.4  | 4.4   | 45.536  | 0.004338   | 14170000 | 3          | 0.427243   | -1.45321  | 0.427243  | -1.74213  |
| Psm8    | Proteasome non-ATPase regulat        | P26516        | P26516        | 17.5    | 17.5    | 17.5    | 17.5    | 17.5    | 17.5    | 17.5    | 17.5    | 17.5    | 2 | 2 | 2 | 15   | 15   | 15    | 36.539  | 0.10522000 | 2        | -4.34E-08  | 0          | -4.34E-08 | 0         |           |
| Psm9    | Proteasome activator complex sub     | P97372;G3X9V  | P97372;G3X9V  | 17.5    | 21.0407 | 24.6751 | 22.0788 | 17.5    | 17.5    | 17.5    | 17.5    | 21.6948 | 1 | 1 | 1 | 9.6  | 9.6  | 9.6   | 5.27057 | 0.42660000 | 5        | 0.252698   | -2.01633   | 0.363007  | 1.27366   |           |
| Ptp1    | Polypyrimidine tract-binding protein | Q8C858;Q8C58  | Q8C58;Q8C58   | 17.5    | 21.1386 | 23.0559 | 24.0157 | 17.5    | 21.1129 | 17.5    | 21.2908 | 24.4916 | 4 | 4 | 4 | 11   | 11   | 11    | 52.63   | 0.56412000 | 6        | 0.0425994  | -3.15469   | 0.0714076 | -0.529277 |           |
| Ptgs2   | Prostaglandin synthase 2             | OQ90Q7;D3Z7C  | OQ90Q7;D3Z7C  | 17.5    | 17.5    | 17.5    | 22.0465 | 17.5    | 20.4465 | 17.5    | 17.5    | 21.0616 | 1 | 1 | 1 | 6.2  | 6.2  | 6.2   | 18.721  | 0.004184   | 6348200  | 1          | -4.34E-08  | 0         | -0.427243 |           |
| Ptgs2   | Prostaglandin synthase 2             | OQ5769        | OQ5769        | 17.5    | 17.5    | 22.4135 | 17.5    | 17.5    | 17.5    | 17.5    | 17.5    | 21.0939 | 3 | 3 | 3 | 7.3  | 7.3  | 7.3   | 69.012  | 0.14867000 | 3        | 0.427243   | -1.63784   | 0.075888  | 0.438174  |           |
| Ptma    | Prothymosin alpha/Prothymosin al     | P26350;A0A087 | P26350;A0A087 | 23.2352 | 21.2731 | 17.5    | 20.0613 | 17.5    | 23.4507 | 17.5    | 17.5    | 23.2666 | 2 | 2 | 2 | 15.3 | 15.3 | 15.3  | 12.254  | 0.55253000 | 6        | 0.0470216  | 0.32071    | 0.186442  | 1.24723   |           |
| Ptth2   | Peptidyl-tRNA hydrolase 2, mitocho   | Q8R2Y8        | Q8R2Y8        | 17.5    | 17.5    | 17.5    | 23.0983 | 17.5    | 17.5    | 17.5    | 17.5    | 22.7879 | 1 | 1 | 1 | 7.7  | 7.7  | 7.7</ |         |            |          |            |            |           |           |           |

|                 |                                                                            |                                           |         |         |         |         |         |         |         |         |         |         |         |    |      |      |      |        |          |           |           |           |           |            |             |           |           |
|-----------------|----------------------------------------------------------------------------|-------------------------------------------|---------|---------|---------|---------|---------|---------|---------|---------|---------|---------|---------|----|------|------|------|--------|----------|-----------|-----------|-----------|-----------|------------|-------------|-----------|-----------|
| S100a14         | Protein S100-A14                                                           | Q8D2Q8                                    | Q9D208  | 22.3832 | 23.672  | 26.5714 | 22.5768 | 22.5101 | 21.1555 | 21.3558 | 23.1284 | 22.7287 | 3       | 3  | 3    | 40.4 | 40.4 | 40.4   | 11.599   | 0         | 1.84e+08  | 13        | 0.738011  | 2.12803    | 0.59821     | 1.80455   |           |
| S100a4          | Protein S100-A4                                                            | P07091;A0A0G2 P07091;A0A0G2JGD2           |         | 17.5    | 17.5    | 22.0067 | 17.5    | 17.5    | 17.5    | 17.5    | 17.5    | 23.0378 | 2       | 2  | 2    | 15.8 | 15.8 | 11.721 | 0.004107 | 2406300   | 2         | 0.427243  | 1.50222   | 0.0495603  | -0.343709   |           |           |
| S100a6          | Protein S100-A6                                                            | P14069                                    | P14066  | 24.8318 | 25.3756 | 25.8433 | 26.0618 | 25.4993 | 25.0233 | 22.4841 | 25.126  | 26.2506 | 3       | 3  | 3    | 25.8 | 25.8 | 10.051 | 0        | 2.44e+08  | 18        | 0.159293  | -0.177896 | 0.250758   | -0.279978   |           |           |
| Sec1            | Syntaxin-1                                                                 | P18828;P18828;P18828;P18828-2             |         | 17.5    | 17.5    | 17.5    | 17.5    | 21.0314 | 17.5    | 17.5    | 21.409  | 17.739  | 1       | 1  | 1    | 6.4  | 6.4  | 32.904 | 0.00565  | 10977000  | 2         | 0.427243  | -1.17789  | 0.272759   | -1.68447    |           |           |
| Sec22b          | Vesicle-trafficking protein Sec22b                                         | O08547;E9G6R3;O08547;E9G6R3               |         | 17.5    | 17.5    | 17.5    | 17.5    | 17.5    | 17.5    | 17.5    | 17.5    | 23.3687 | 1       | 1  | 1    | 6.5  | 6.5  | 6.5    | 24.74    | 0.00431   | 5415800   | 1         | -4.34e-08 | 0.427243   | -1.62291    |           |           |
| Sec61a1         | Protein transport protein Sec61 sub P61620;O91R1.1;P61620                  |                                           |         | 17.5    | 22.1997 | 24.327  | 22.6536 | 17.5    | 17.5    | 17.5    | 17.5    | 21.7386 | 3       | 3  | 3    | 6.7  | 6.7  | 6.7    | 52.264   | 0.0238000 | 9         | 0.0984997 | 0.705683  | 0.420541   | 1.34879     |           |           |
| Sec61b          | Protein transport protein Sec61 sub O9CQ58                                 |                                           | Q9CQ58  | 17.5    | 17.5    | 17.5    | 23.8147 | 24.0446 | 24.1332 | 22.6797 | 17.5    | 24.0814 | 1       | 1  | 1    | 15.6 | 15.6 | 15.6   | 9.9583   | 0.0360000 | 5         | 6.56418   | -6.4975   | 0.145583   | -3.92037    |           |           |
| Serb1p          | Plasminogen activator inhibitor 1 R                                        | O9CYS58;O9CYS58;O9CYS58;O9CYS58-2;O9CYS58 |         | 23.3648 | 24.2961 | 24.1251 | 24.3176 | 17.5    | 17.5    | 17.5    | 24.2345 | 26.0052 | 7       | 7  | 7    | 24.6 | 24.6 | 44.714 | 0        | 2.35e+08  | 21        | 0.589261  | 2.66541   | 0.191884   | 1.34879     |           |           |
| Serp1h1         | Serpin H1                                                                  | P19324;A0A104 P19324;A0A104;A0LH94        |         | 23.1398 | 23.1219 | 23.618  | 23.8929 | 23.237  | 26.1195 | 17.5    | 24.5931 | 25.2621 | 3       | 3  | 3    | 9.4  | 9.4  | 46.533 | 0        | 2.83e+08  | 15        | 0.578317  | -1.55661  | 0.112951   | 0.820411    |           |           |
| Ser1            | Serpin H1                                                                  | P18828;P18828;P18828;P18828-2             |         | 17.5    | 17.5    | 17.5    | 17.5    | 21.0314 | 17.5    | 17.5    | 21.409  | 17.739  | 1       | 1  | 1    | 6.4  | 6.4  | 32.904 | 0.00565  | 10977000  | 2         | 0.427243  | -1.17789  | 0.272759   | -1.68447    |           |           |
| Sfl1            | Splicing factor 1                                                          | Q64213;Q64213;Q64213;Q64213-2;Q3VYH4      |         | 20.1958 | 17.5    | 17.5    | 23      | 17.5    | 17.5    | 17.5    | 17.5    | 22.3978 | 1       | 1  | 1    | 2    | 2    | 70.402 | 0.004367 | 18944000  | 1         | 0.188709  | -0.994761 | 0.162665   | -0.794012   |           |           |
| SfB3a           | Splicing factor 3B subunit 3                                               | Q921M3-2;Q921M3-2;Q921M3-2                |         | 17.5    | 20.8428 | 21.0762 | 22.6139 | 17.5    | 22.6861 | 17.5    | 17.5    | 24.4231 | 3       | 3  | 3    | 3.7  | 3.7  | 125.31 | 0        | 436500000 | 9         | 0.211172  | -1.12701  | 0.00553073 | -0.00438372 |           |           |
| SfB3b           | Splicing factor 3B subunit 4                                               | Q8Q2Y9                                    | Q8Q2Y9  | 17.5    | 17.5    | 17.5    | 20.3055 | 17.5    | 20.3766 | 17.5    | 17.5    | 20.2715 | 1       | 1  | 1    | 3.3  | 3.3  | 3.3    | 44.355   | 0.004301  | 3922800   | 2         | 0.934874  | -1.89403   | 0.427243    | -0.923834 |           |
| Sfqa            | Splicing factor, proline and arginine                                      | O8V106                                    | O8V106  | 17.5    | 17.5    | 22.9156 | 22.8742 | 17.5    | 23.7767 | 17.5    | 17.5    | 23.0273 | 1       | 1  | 1    | 2.4  | 2.4  | 75.441 | 0.002268 | 497590000 | 4         | 0.31978   | -2.07844  | 0.00473083 | -0.037262   |           |           |
| Shm22           | Serine hydroxymethyltransferase                                            | Q8C2N7                                    | Q8C2N7  | 17.5    | 17.5    | 17.5    | 21.7804 | 22.1813 | 17.5    | 17.5    | 21.4867 | 21.7965 | 1       | 1  | 1    | 2.2  | 2.2  | 55.758 | 0.002262 | 149400000 | 6         | 0.932241  | 0         | 0.932302   | -2.76108    |           |           |
| Slc25a24        | Calcium-binding mitochondrial carrier                                      | O8BM08                                    | O8BM08  | 17.5    | 20.8594 | 21.7315 | 21.0615 | 19.9074 | 17.5    | 17.5    | 17.5    | 20.0294 | 1       | 1  | 1    | 2.7  | 2.7  | 27     | 52.901   | 0.009191  | 10907000  | 4         | 0.118414  | 0.540658   | 0.174816    | 1.168124  |           |
| Slc25a3         | Phosphate carrier protein, mitochondrion                                   | O8VEM8;O5E902;O8VEM8;O5E902               |         | 23.2333 | 25.7729 | 26.5332 | 26.4896 | 26.1274 | 24.3102 | 24.3683 | 23.7907 | 25.4253 | 6       | 6  | 6    | 15.7 | 15.7 | 15.9   | 39.632   | 0         | 5.12e+08  | 33        | 0.142411  | -0.462566  | 0.230943    | 0.615668  |           |
| Slc25a5;Slc25a4 | ADP/ATP translocase 2;ADP/ATP translocase 2                                | P51881;P48962;P51881;P48962               |         | 21.4488 | 25.0432 | 27.3265 | 25.3832 | 26.2366 | 26.1901 | 24.4862 | 23.8905 | 26.5299 | 10      | 10 | 10   | 30.9 | 30.9 | 30.9   | 32.931   | 0         | 6.34e+08  | 33        | 0.318333  | -1.32046   | 0.1604402   | -0.335691 |           |
| Slc39a7         | Zinc transporter SLC39A7                                                   | Q31125                                    | Q31125  | 17.5    | 17.5    | 17.5    | 21.5106 | 17.5    | 17.5    | 17.5    | 17.5    | 17.5    | 2       | 2  | 2    | 7.1  | 7.1  | 7.1    | 50.656   | 0.004098  | 4989300   | 2         | 0.427243  | -1.33685   | -1.34e-08   | 0         |           |
| Slc3a2          | 4F2 cell-surface antigen heavy chain P10852;A0A0U1 P10852;A0A0U1;R0K4;P101 |                                           |         | 21.2414 | 23.0014 | 17.5    | 17.5    | 17.5    | 21.8418 | 17.5    | 17.5    | 17.5    | 1       | 1  | 1    | 3.2  | 3.2  | 58.336 | 0.003906 | 22821000  | 3         | 0.306138  | 1.63366   | 0.884943   | 3.08094     |           |           |
| Smarc5          | SWI/SNF-related matrix-associated 1                                        | Q912N3                                    | Q912N3  | 17.5    | 17.5    | 17.5    | 17.5    | 23.1096 | 17.5    | 17.5    | 17.5    | 17.5    | 1       | 1  | 1    | 1.4  | 1.4  | 121.63 | 0        | 90505000  | 1         | 0.472243  | 1.85986   | 0          | -4.34e-08   |           |           |
| Snd1            | Staphylococcal nuclease domain                                             | Q78P77;Q3TJ56;Q78P77;Q3TJ56               |         | 19.8867 | 21.36   | 24.0102 | 23.1683 | 22.0479 | 21.8732 | 17.5    | 19.6766 | 23.533  | 6       | 6  | 6    | 8.9  | 8.9  | 8.9    | 102.09   | 0         | 60132000  | 6         | 0.182669  | -0.610853  | 0.126842    | 0.752075  |           |
| Snrnp27         | U4/U6/U5 small nuclear ribonucleoprotein                                   | Q8K194;O8K194;O8K194;O8K194-2             |         | 19.9923 | 20.7534 | 23.151  | 22.2076 | 17.5    | 20.9262 | 17.5    | 20.5577 | 22.7009 | 3       | 3  | 3    | 17.4 | 17.4 | 17.4   | 18.885   | 0         | 40542000  | 8         | 0.254533  | 0.22976    | 1.04603     | 0         |           |
| Snrnp70         | U1 small nuclear ribonucleoprotein                                         | Q62376;A0A10C Q62376;A0A10C;R0GR44;Q62    |         | 17.5    | 17.5    | 17.5    | 21.7209 | 17.5    | 17.5    | 17.5    | 17.5    | 17.5    | 1       | 1  | 1    | 2.2  | 2.2  | 51.991 | 0.005639 | 3456500   | 1         | 0.427243  | -1.40696  | 0          | -4.34e-08   |           |           |
| Srk1            | Splicing regulatory glutamine/lysine                                       | Q8B2K4;A0A10C Q8B2K4;A0A10C;B0G584;A0A1   |         | 17.5    | 17.5    | 17.5    | 17.5    | 17.5    | 17.5    | 17.5    | 17.5    | 22.1921 | 1       | 1  | 1    | 2.8  | 2.8  | 56.763 | 0        | 7.560100  | 1         | -4.34e-08 | 0.427243  | -1.56403   | -1.56403    |           |           |
| Srk1            | Serine/arginine repetitive matrix protein                                  | Q524H8;A2A9V9;Q524H8;A2A9V9;Q524H8;A2A9V9 |         | 17.5    | 20.901  | 23.909  | 17.5    | 17.5    | 22.0847 | 17.5    | 22.5568 | 22.9841 | 5       | 5  | 5    | 8.2  | 8.2  | 106.86 | 0        | 1.34e+08  | 19        | 0.293896  | 1.74178   | 0.3204682  | -0.245955   |           |           |
| Srk1            | Serine/arginine repetitive matrix protein                                  | Q47639;O8B178;O8B178;O8B178-2;Q8B178      |         | 24.7639 | 24.7215 | 25.2262 | 24.7318 | 24.0135 | 23.2547 | 24.598  | 24.9748 | 24.77   | 14      | 14 | 14   | 7.1  | 7.1  | 294.84 | 0        | 2.84e+08  | 10        | -0.817525 | 0.427243  | 0.427243   | 0.427243    |           |           |
| Srf1            | Serine/arginine-rich splicing factor                                       | Q1G6PM2;H7BX9;Q1G6PM2;H7BX9;Q1G6PM2       |         | 20.8976 | 25.5236 | 25.2165 | 25.5603 | 20.8744 | 19.8612 | 25.3977 | 26.2301 | 10      | 10      | 10 | 42.3 | 42.3 | 42.3 | 27.744 | 0        | 5.82e+08  | 53        | 0.310664  | 2.21212   | 0.335544   | 1.71574     |           |           |
| Srf10           | Serine/arginine-rich splicing factor                                       | Q1G6PM2;H7BX9;Q1G6PM2;H7BX9;Q1G6PM2       |         | 17.5    | 23.6571 | 17.5    | 24.3261 | 17.5    | 21.5294 | 17.5    | 17.5    | 23.6337 | 3       | 3  | 3    | 17.9 | 17.9 | 31.3   | 0        | 1.02e+08  | 3         | 0.213104  | -1.56612  | 0.00087872 | 0.00786014  |           |           |
| Srf11           | Serine/arginine-rich splicing factor                                       | Q1G6PM2;H7BX9;Q1G6PM2;H7BX9;Q1G6PM2       |         | 17.5    | 19.6865 | 20.2643 | 19.5814 | 17.5    | 17.5    | 17.5    | 17.5    | 22.0179 | 4       | 4  | 4    | 13.9 | 13.9 | 13.9   | 53.102   | 0         | 3.8726000 | 9         | 0.356433  | 0.956484   | 0.0280938   | 0.144307  |           |
| Srf2            | Serine/arginine-rich splicing factor                                       | Q262093                                   | Q262093 | 25.2969 | 24.1565 | 25.3819 | 25.3009 | 22.8313 | 24.7067 | 23.5441 | 25.6588 | 26.1373 | 4       | 4  | 4    | 21.7 | 21.7 | 21.7   | 25.476   | 0         | 6.69e+08  | 33        | 0.324378  | 0.665464   | 0.124292    | -0.271677 |           |
| Srf3;Gm12355    | FACT complex subunit SSRP1                                                 | P84104;P84104;P84104;P84104-2;A2A4W6      |         | 26.7015 | 17.5    | 17.5    | 26.4498 | 27.4138 | 23.9852 | 27.4889 | 23.6125 | 27.8876 | 28.2125 | 8  | 7    | 7    | 2.8  | 2.8    | 80.855   | 0         | 10704000  | 77        | 0.327262  | 0.123449   | 0.0847626   | -0.455384 |           |
| Srf4            | Serine/arginine-rich splicing factor                                       | Q8V897;Q52V3 Q8V897;Q52V3                 |         | 17.5    | 17.5    | 17.5    | 17.5    | 17.5    | 17.5    | 17.5    | 17.5    | 22.7158 | 2       | 2  | 2    | 4.5  | 4.5  | 2.7    | 2.7      | 55.979    | 0         | 42365000  | 2         | -4.34e-08  | 0.917869    | -1.33554  |           |
| Srf5            | Serine/arginine-rich splicing factor                                       | Q35326;Q08D85;Q35326;Q08D85               |         | 21.6073 | 22.5718 | 17.5    | 24.1349 | 17.5    | 24.1017 | 17.5    | 23.2227 | 26.4748 | 2       | 2  | 2    | 10.8 | 10.8 | 7.4    | 7.4      | 30.891    | 0         | 2.55e+08  | 13        | 0.196304   | -1.38585    | 0.235871  | -1.83947  |
| Srf6            | Q3TWW8;A0A01T;Q3TWW8                                                       |                                           |         | 24.1733 | 22.2738 | 23.825  | 24.5989 | 23.3479 | 21.9195 | 22.8099 | 24.2511 | 24.5535 | 5       | 5  | 5    | 2    | 2    | 14.5   | 11.8     | 39.025    | 0         | 2.08e+08  | 25        | 0.0478048  | 0.135291    | 0.129389  | -0.447427 |
| Srf7            | Serine/arginine-rich splicing factor                                       | Q8BL97;Q8BL97;Q8BL97;Q8BL97-3;Q8BL97      |         | 24.5967 | 26.8513 | 22.9902 | 26.5516 | 19.741  | 24.083  | 22.0616 | 23.252  | 26.1262 | 6       | 6  | 6    | 24.7 | 24.7 | 30.17  | 0        | 5.18e+08  | 22        | 0.060568  | 0.35419   | 0.0390938  | -0.165792   |           |           |
| Srpf            | Translocase-associated protein subunit                                     | Q9DC99;Q9DC99;Q9DC99;Q9DC99-2             |         | 17.5    | 17.5    | 17.5    | 21.4366 | 17.5    | 17.5    | 17.5    | 17.5    | 21.1165 | 1       | 1  | 1    | 7.6  | 7.6  | 21.6   | 21.064   | 0.003795  | 5112600   | 1         | 0.427243  | -1.3222    | 0.427243    | -1.20552  |           |
| Stat1           | FACT complex subunit SSRP1                                                 | Q8V897;Q52V3 Q8V897;Q52V3                 |         | 17.5    | 17.5    | 17.5    | 17.5    | 17.5    | 17.5    | 17.5    | 17.5    | 22.7158 | 2       | 2  | 2    | 4.5  | 4.5  | 2.7    | 2.7      | 55.979    | 0         | 42365000  | 2         | -4.34e-08  | 0.917869    | -1.33554  |           |
| Stat1           | Signal transducer and activator of transcription 4                         | P44225;Q8C3V4;P44225;Q8C3V4;A0A08R7W      |         | 17.5    | 22.1229 | 22.0769 | 23.6786 | 17.5    | 21.4147 | 19.9913 | 20.1899 | 21.9712 | 4       | 4  | 4    | 6.1  | 6.1  | 6.1    | 87.196   | 0         | 33378000  | 5         | 0.0428824 | -0.297858  | 0.00946441  | 0.0491371 |           |
| Stip1           | Stress-induced-phosphoprotein 1                                            | Q08064                                    | Q08064  | 21.3147 | 22.453  | 22.6916 | 22.4733 | 21.9115 | 23.2055 | 19.9801 | 23.1369 | 23.5343 | 2       | 2  | 2    | 4.2  | 4.2  | 4.2    | 62.581   | 0         | 170196000 | 11        | 0.256921  | -0.376979  | 0.017674    | -0.063996 |           |
| Stmn1           | Stathmin                                                                   | P54227;D3Z128;P54227;D3Z128;D3Z5N2        |         | 22.3172 | 17.5    | 22.24   | 21.8737 | 17.5    | 23.7985 | 17.5    | 17.5    | 25.0083 | 2       | 2  | 2    | 18.1 | 18.1 | 17.274 | 0        | 1.36e+08  | 7         | 0.025978  | -0.376974 | 0.0806876  | 0.677649    |           |           |
| Stmn2           | Stathmin-2                                                                 | P55821                                    | P55821  | 17.5    | 20.4403 | 17.5    | 21.2255 | 17.5    | 20.7097 | 17.5    | 17.5    | 17.5    | 1       | 1  | 1    | 5.6  | 5.6  | 5.6    | 20.828   | 0.004237  | 16669000  | 3         | 0.365305  | -1.33164   | 0.427243    | 0.990101  |           |
| Str3a           | Dolichyl-diphosphooligosaccharin transferase                               | P46978                                    | P46978  | 17.5    | 20.8441 | 21.6713 | 20.4666 | 17.5    | 17.5    | 17.5    | 17.5    | 21.5762 | 1       | 1  | 1    | 1.6  | 1.6  | 10.897 | 0.004384 | 11662000  | 1         | 0.13104   | 1.74178   | 0.3204682  | 1.8005      |           |           |
| Sumo2;Sumo3     | Small ubiquitin-related modifier 2;SUMO2;SUMO3                             | P61957;Q92172;P61957;Q92172;G3UJZ6;H      |         | 22.1115 | 22.1229 | 22.3459 | 22.4638 | 17.5    | 17.5    | 17.5    |         |         |         |    |      |      |      |        |          |           |           |           |           |            |             |           |           |

|     |                                 |                                      |        |         |         |         |      |         |         |         |         |   |   |   |      |      |        |          |          |          |          |          |           |          |          |
|-----|---------------------------------|--------------------------------------|--------|---------|---------|---------|------|---------|---------|---------|---------|---|---|---|------|------|--------|----------|----------|----------|----------|----------|-----------|----------|----------|
| Zyx | Zyxin                           | Q7TQE2;Q62523;Q7TQE2;Q62523;A0A0N451 | 24.123 | 24.6724 | 23.0673 | 25.0872 | 17.5 | 24.1897 | 20.9685 | 24.8638 | 25.4445 | 4 | 4 | 4 | 10.7 | 10.7 | 10.7   | 57.026   | 0        | 2.89E+08 | 14       | 0.279552 | 1.69526   | 0.045019 | 0.195285 |
|     | UPF0444 transmembrane protein C | Q9DAM7                               | 17.5   | 17.5    | 24.4654 | 24.3808 | 17.5 | 21.7552 | 17.5    | 17.5    | 23.2242 | 1 | 1 | 1 | 22.6 | 22.6 | 11.549 | 0.002222 | 90384000 | 4        | 0.1714   | -1.3902  | 0.047135  | 0.413747 |          |
|     |                                 | ADA140LI4                            | 17.5   | 22.6036 | 23.4242 | 17.5    | 17.5 | 21.3576 | 21.7948 | 22.418  | 17.5    | 2 | 2 | 2 | 0.6  | 0.6  | 516.94 | 0.004049 | 43918000 | 1        | 0.457096 | 2.39006  | 0.0891578 | 0.604989 |          |
